# Supplementary material for: Anti-masculinization induced by aromatase inhibitors in adult female zebrafish
Source: BMC Genomics. 2020 Jan 7;21:22. doi: 10.1186/s12864-019-6437-z (PMC6947999; doi:10.1186/s12864-019-6437-z)
Supplement: Supplementary file 7 — Additional file 7. The list of differentially expressed genes (DEGs) between solvent control females and solvent control males [file 12864_2019_6437_MOESM7_ESM.xlsx]

## Sheet: Sheet1
DEGcm2cf upregulated in solvent control female
gene id	baseMean	log2FoldChange	lfcSE	stat	pvalue	padj	gene name
ENSDARG00000000001	148.204	-2.63113	0.695286	-3.78424	0.000154176	0.000636304	slc35a5
ENSDARG00000000142	53.902	-2.10096	0.878661	-2.39109	0.0167982	0.0367289	tmem267
ENSDARG00000000151	340.152	-2.46555	0.586343	-4.20496	2.61125e-05	0.000133779	thraa
ENSDARG00000000161	80.1846	-2.03687	0.844707	-2.41134	0.0158942	0.0350385	itsn2a
ENSDARG00000000423	200.503	-1.54927	0.592273	-2.61581	0.00890164	0.0213716	si:ch73-314g15.3
ENSDARG00000000442	420.768	-2.68814	0.54012	-4.97693	6.46019e-07	4.88984e-06	slc39a13
ENSDARG00000000476	388.147	-1.79575	0.527259	-3.40582	0.000659666	0.00227942	pms1
ENSDARG00000000540	599.949	-1.77582	0.493877	-3.59568	0.000323546	0.00122387	asnsd1
ENSDARG00000000542	706.667	-1.73105	0.585031	-2.95891	0.00308734	0.00864174	gtf2e1
ENSDARG00000000568	866.769	-2.27757	0.535008	-4.25708	2.07116e-05	0.000108716	ell
ENSDARG00000000588	212.18	-1.85872	0.612699	-3.03366	0.00241608	0.00699106	grasp
ENSDARG00000000631	430.828	-1.97779	0.648473	-3.04992	0.00228902	0.00666596	ptpn4a
ENSDARG00000000656	9.9624	-6.50913	2.19662	-2.96324	0.00304414	0.0085359	psmb9a
ENSDARG00000000747	422.647	-3.37908	0.553684	-6.10291	1.04156e-09	1.46864e-08	lcmt2
ENSDARG00000000760	222.635	-2.02059	0.567696	-3.55927	0.000371881	0.00138546	znf511
ENSDARG00000000830	385.41	-2.0309	0.534144	-3.80215	0.000143446	0.000597122	telo2
ENSDARG00000000857	615.951	-1.65368	0.483271	-3.42185	0.00062197	0.00216312	mapk14a
ENSDARG00000000935	42.5568	-2.35055	0.845797	-2.7791	0.00545104	0.0140584	unk
ENSDARG00000001169	400.982	-1.80814	0.544835	-3.31869	0.000904404	0.00300269	hsd17b8
ENSDARG00000001210	755.184	-1.64409	0.536017	-3.06724	0.00216048	0.00634654	arl14ep
ENSDARG00000001249	453.685	-1.73883	0.496749	-3.50042	0.000464526	0.00168236	pcgf1
ENSDARG00000001470	187.987	-1.47585	0.613561	-2.40538	0.0161555	0.0355159	mhc1zea
ENSDARG00000001549	164.038	-3.5057	0.627889	-5.58331	2.3598e-08	2.45924e-07	sp3a
ENSDARG00000001676	61.9784	-1.91369	0.754818	-2.5353	0.011235	0.0259931	gpm6bb
ENSDARG00000001754	878.738	-1.54736	0.509289	-3.03828	0.00237932	0.00689545	noc2l
ENSDARG00000001769	41.5162	-2.7367	0.933709	-2.931	0.00337871	0.0093489	ptpra
ENSDARG00000001776	134.308	-2.61457	0.645486	-4.05054	5.11001e-05	0.000241968	stim2b
ENSDARG00000001777	1125.08	-2.4514	0.571436	-4.28989	1.78763e-05	9.54089e-05	nup155
ENSDARG00000001873	834.703	-2.26799	0.506167	-4.48072	7.43923e-06	4.3776e-05	phgdh
ENSDARG00000001890	1166.51	-1.58749	0.467452	-3.39604	0.000683678	0.00235507	stt3b
ENSDARG00000001897	859.99	-1.48114	0.476369	-3.10922	0.00187583	0.00561467	man2b1
ENSDARG00000001930	300.883	-2.2017	0.534107	-4.1222	3.75276e-05	0.000184261	klhl15
ENSDARG00000001939	388.314	-2.28788	0.518	-4.41676	1.0019e-05	5.7184e-05	b3gat3
ENSDARG00000001940	2246.99	-1.65352	0.462017	-3.5789	0.000345038	0.00129853	dnajc1
ENSDARG00000001968	43.0202	-2.83574	0.893915	-3.17227	0.00151253	0.00467247	dock5
ENSDARG00000002002	264.008	-3.53088	0.583129	-6.05505	1.4037e-09	1.91955e-08	lmcd1
ENSDARG00000002016	1101.16	-2.09509	0.533483	-3.92718	8.59463e-05	0.000381358	ppil2
ENSDARG00000002021	704.728	-3.2629	0.502666	-6.49118	8.51651e-11	1.4605e-09	pygb
ENSDARG00000002031	618.874	-2.94155	0.545576	-5.39164	6.9819e-08	6.58963e-07	tox4a
ENSDARG00000002077	359.12	-1.34556	0.563879	-2.38626	0.0170205	0.0371527	mnat1
ENSDARG00000002127	808.502	-1.77932	0.477423	-3.72693	0.000193823	0.000779787	stam
ENSDARG00000002174	446.745	-1.38775	0.578498	-2.39888	0.0164454	0.0360532	itfg2
ENSDARG00000002184	779.993	-1.62403	0.520595	-3.11956	0.00181123	0.0054511	igbp1
ENSDARG00000002197	1074.67	-3.86456	0.778356	-4.96504	6.86884e-07	5.17096e-06	pygl
ENSDARG00000002220	713.247	-1.33777	0.494119	-2.70738	0.00678172	0.016947	zgc:103692
ENSDARG00000002267	1424.23	-1.55818	0.515559	-3.02232	0.00250846	0.00722446	dcaf13
ENSDARG00000002271	2388.02	-2.38284	0.459234	-5.18872	2.11742e-07	1.80098e-06	zfand5b
ENSDARG00000002285	80.4233	-1.97209	0.701354	-2.81184	0.00492596	0.0128974	mcoln1a
ENSDARG00000002298	523.306	-3.62337	0.530059	-6.83578	8.15596e-12	1.66938e-10	ankrd22
ENSDARG00000002304	866.647	-1.44834	0.583457	-2.48235	0.013052	0.0295594	gins2
ENSDARG00000002330	825.034	-3.1682	0.599991	-5.28042	1.28891e-07	1.1491e-06	lhx8a
ENSDARG00000002332	471.877	-2.06466	0.513381	-4.0217	5.77796e-05	0.000269857	frmd6
ENSDARG00000002339	384.568	-2.03151	0.5293	-3.83811	0.000123984	0.000526167	sgf29
ENSDARG00000002344	8217.97	-1.36793	0.499249	-2.73998	0.00614423	0.0155659	tubb4b
ENSDARG00000002347	1382.05	-3.98241	0.558374	-7.13215	9.88139e-13	2.32218e-11	cyp11a1
ENSDARG00000002355	15.3234	-3.90954	1.52288	-2.5672	0.0102523	0.0240451	shpk
ENSDARG00000002396	610.372	-1.86793	0.577171	-3.23635	0.00121068	0.00385528	cry-dash
ENSDARG00000002401	743.247	-2.40344	0.479518	-5.0122	5.38112e-07	4.14656e-06	gale
ENSDARG00000002463	49.7722	-3.18023	0.844322	-3.76661	0.00016548	0.000677167	arhgef37
ENSDARG00000002479	903.424	-1.39444	0.512615	-2.72024	0.0065234	0.0163981	ercc6l
ENSDARG00000002536	622.333	-2.38216	0.491301	-4.84868	1.24285e-06	8.76505e-06	tm9sf4
ENSDARG00000002546	341.888	-1.92255	0.555803	-3.45904	0.000542105	0.00192011	rundc3ab
ENSDARG00000002597	1900.99	-7.6299	0.569519	-13.3971	6.28759e-41	3.24732e-38	pabpc1l
ENSDARG00000002685	992.543	-1.89611	0.492281	-3.85169	0.000117306	0.000501146	fam113
ENSDARG00000002710	5323.84	-1.13385	0.461427	-2.45727	0.0139997	0.0314045	ncl
ENSDARG00000002720	806.69	-2.34937	0.495494	-4.74148	2.12159e-06	1.42087e-05	utp15
ENSDARG00000002731	494.424	-1.82873	0.560793	-3.26097	0.00111032	0.00357466	sdc2
ENSDARG00000002760	12.779	-6.86843	2.08196	-3.29902	0.000970226	0.00319353	gdf5
ENSDARG00000002787	907.159	-1.38808	0.475042	-2.922	0.00347788	0.00957678	tle3a
ENSDARG00000002792	983.857	-1.50604	0.54438	-2.76652	0.00566576	0.0145362	arcn1a
ENSDARG00000002798	406.423	-2.32109	0.503183	-4.61282	3.97234e-06	2.50734e-05	cog8
ENSDARG00000002826	908.197	-1.76826	0.528171	-3.3479	0.000814272	0.00273452	cep57l1
ENSDARG00000002830	488.355	-2.96791	0.562635	-5.27501	1.3275e-07	1.1817e-06	trmt2a
ENSDARG00000002877	559.662	-1.97827	0.488134	-4.05271	5.06272e-05	0.000240087	reps1
ENSDARG00000002894	470.146	-1.26502	0.491813	-2.57216	0.0101065	0.0237684	aven
ENSDARG00000002909	1344.05	-1.60645	0.528937	-3.03713	0.00238843	0.00692064	tjp3
ENSDARG00000002912	993.538	-2.70405	0.472261	-5.72575	1.02976e-08	1.15792e-07	adipor1a
ENSDARG00000002916	487.753	-2.42235	0.517945	-4.67685	2.91313e-06	1.89e-05	sec31b
ENSDARG00000002994	601.644	-1.40187	0.571106	-2.45465	0.0141022	0.0316122	itpkca
ENSDARG00000003017	1043.62	-1.39051	0.479403	-2.9005	0.00372572	0.0101597	ube2al
ENSDARG00000003027	564.718	-2.59274	0.510103	-5.08277	3.71969e-07	2.97361e-06	scnm1
ENSDARG00000003035	2594.58	-2.12454	0.474878	-4.47387	7.68179e-06	4.50006e-05	hspa9
ENSDARG00000003069	98.9994	-3.25839	0.747477	-4.35918	1.3055e-05	7.24816e-05	btbd7
ENSDARG00000003084	92.9786	-4.6053	1.10416	-4.17087	3.03437e-05	0.000152632	spire2
ENSDARG00000003091	286.331	-4.56852	0.85792	-5.32512	1.00887e-07	9.18991e-07	oclnb
ENSDARG00000003144	119.291	-2.25858	0.636722	-3.5472	0.000389349	0.00144159	pxmp2
ENSDARG00000003169	354.83	-1.56916	0.589363	-2.66247	0.00775694	0.0189992	magi1b
ENSDARG00000003197	153.734	-2.9405	0.845398	-3.47825	0.000504707	0.00180666	wdr21
ENSDARG00000003208	295.342	-1.91626	0.528276	-3.62739	0.000286302	0.00109889	pomk
ENSDARG00000003217	571.575	-1.90118	0.500994	-3.79482	0.000147751	0.000612515	urb2
ENSDARG00000003229	273.238	-4.79912	0.808565	-5.93535	2.93218e-09	3.72315e-08	gdf9
ENSDARG00000003250	157.03	-2.66668	0.67456	-3.95322	7.71079e-05	0.000346782	pik3cd
ENSDARG00000003251	255.186	-2.25441	0.795029	-2.83564	0.00457347	0.0121043	zbtb22b
ENSDARG00000003281	1085.57	-3.8187	0.536018	-7.12421	1.04681e-12	2.44968e-11	pik3ip1
ENSDARG00000003287	699.633	-1.76606	0.509878	-3.46368	0.000532836	0.00189241	wdr12
ENSDARG00000003383	454.689	-1.26747	0.54422	-2.32896	0.0198611	0.0423337	asb8
ENSDARG00000003446	199.318	-3.26218	0.594715	-5.48528	4.12807e-08	4.08539e-07	ippk
ENSDARG00000003462	244.996	-4.35252	0.684035	-6.36301	1.97843e-10	3.20007e-09	fech
ENSDARG00000003519	537.998	-2.98992	0.553326	-5.40354	6.53386e-08	6.20633e-07	aprt
ENSDARG00000003531	792.401	-1.28227	0.477023	-2.68808	0.00718652	0.0178004	tcea1
ENSDARG00000003544	77.1069	-2.88666	0.714481	-4.04022	5.34014e-05	0.000251418	adarb1b
ENSDARG00000003570	8203.15	-2.34654	0.476476	-4.92479	8.44522e-07	6.20826e-06	hsp90b1
ENSDARG00000003655	665.085	-4.94172	0.719356	-6.86963	6.4367e-12	1.3397e-10	tmem59l
ENSDARG00000003701	5082.28	-8.34903	0.517493	-16.1336	1.48118e-58	4.69914e-55	cldng
ENSDARG00000003706	242.454	-2.67002	0.615469	-4.33819	1.43659e-05	7.88917e-05	ryr2b
ENSDARG00000003750	354.977	-2.0159	0.587855	-3.42925	0.000605254	0.00211108	pfas
ENSDARG00000003822	76.0284	-2.20607	0.737367	-2.99183	0.00277314	0.00786539	ankrd16
ENSDARG00000003872	213.45	-2.20306	0.662272	-3.32653	0.000879361	0.00293006	ccdc102a
ENSDARG00000003899	113.173	-1.88432	0.702029	-2.6841	0.00727248	0.0179832	zdhhc23b
ENSDARG00000003910	911.433	-1.47291	0.4774	-3.08527	0.00203366	0.006017	med13b
ENSDARG00000003941	1087.65	-1.94696	0.486259	-4.00395	6.22932e-05	0.000287559	rrs1
ENSDARG00000003968	2055.3	-9.0982	0.67461	-13.4866	1.87522e-41	1.01573e-38	larp6b
ENSDARG00000003973	120.24	-3.50469	0.666483	-5.25849	1.45242e-07	1.28049e-06	chordc1a
ENSDARG00000003984	584.723	-2.21593	0.495582	-4.47138	7.77178e-06	4.54214e-05	LTN1
ENSDARG00000004018	44.5526	-2.10882	0.899925	-2.34334	0.0191122	0.0409537	CHST13
ENSDARG00000004037	698.537	-1.51968	0.493422	-3.07988	0.00207087	0.00611324	cog2
ENSDARG00000004046	670.48	-2.45604	0.497584	-4.93594	7.97663e-07	5.90877e-06	phf6
ENSDARG00000004114	97.6096	-2.35344	0.653157	-3.60317	0.000314356	0.00119337	tti1
ENSDARG00000004115	353.765	-3.68493	0.687519	-5.35975	8.33391e-08	7.76075e-07	mgat4b
ENSDARG00000004130	404.479	-2.98606	0.566341	-5.27255	1.34543e-07	1.19613e-06	mvk
ENSDARG00000004154	72.9594	-2.05496	0.784322	-2.62005	0.00879175	0.0211581	orai1b
ENSDARG00000004169	2239.09	-1.73657	0.61199	-2.83757	0.00454583	0.0120398	stmn1a
ENSDARG00000004173	1948.51	-1.47933	0.468267	-3.15915	0.00158228	0.00485283	copa
ENSDARG00000004177	50.5536	-3.2058	1.02486	-3.12803	0.00175983	0.00531586	fam169ab
ENSDARG00000004189	824.114	-1.38158	0.482533	-2.86319	0.00419399	0.011242	cbx1a
ENSDARG00000004280	1004.23	-1.90953	0.470126	-4.06175	4.87056e-05	0.000232065	seh1l
ENSDARG00000004305	22.0276	-4.42251	1.39811	-3.1632	0.00156045	0.00479714	vangl1
ENSDARG00000004306	130.332	-3.73839	0.669488	-5.58396	2.35108e-08	2.45131e-07	klhl18
ENSDARG00000004311	811.806	-2.35879	0.547244	-4.3103	1.63031e-05	8.80066e-05	ldlrap1a
ENSDARG00000004325	188.21	-1.44043	0.580745	-2.48032	0.0131264	0.0296946	casp9
ENSDARG00000004343	549.781	-1.18813	0.520306	-2.28353	0.0223992	0.0469418	nelfe
ENSDARG00000004392	487.132	-2.44316	0.512942	-4.76304	1.907e-06	1.29e-05	hdr
ENSDARG00000004405	630.131	-4.76834	0.523813	-9.10313	8.77691e-20	5.80112e-18	snx10a
ENSDARG00000004447	81.7126	-5.50289	0.975912	-5.63872	1.71323e-08	1.83715e-07	aplnr2
ENSDARG00000004460	850.91	-2.04819	0.485224	-4.22113	2.43083e-05	0.000125515	desi2
ENSDARG00000004470	973.922	-1.3114	0.497603	-2.63543	0.00840296	0.0203548	prkcsh
ENSDARG00000004527	579.742	-1.61985	0.539123	-3.00461	0.0026592	0.00758386	pin4
ENSDARG00000004529	1211.79	-2.26119	0.499583	-4.52616	6.00659e-06	3.62386e-05	zgc:173742
ENSDARG00000004574	235.989	-2.14792	0.748757	-2.86865	0.00412233	0.0110713	gtf3c2
ENSDARG00000004581	1091.64	-2.26412	0.493521	-4.58769	4.48184e-06	2.78959e-05	sel1l
ENSDARG00000004636	238.36	-2.22283	0.543812	-4.0875	4.36039e-05	0.000210741	ccdc9
ENSDARG00000004647	632.906	-1.81848	0.677768	-2.68305	0.00729548	0.0180321	spice1
ENSDARG00000004713	2395.93	-1.57364	0.630177	-2.49714	0.0125198	0.0285052	mad2l1
ENSDARG00000004726	460.609	-1.53993	0.493692	-3.11921	0.00181336	0.00545456	trappc11
ENSDARG00000004745	51.239	-3.07878	0.969548	-3.17548	0.00149587	0.00462808	lmbr1l
ENSDARG00000004774	827.143	-1.73262	0.557305	-3.10892	0.0018777	0.00561767	wdr36
ENSDARG00000004806	635.952	-2.88731	0.489795	-5.89495	3.74799e-09	4.66044e-08	grwd1
ENSDARG00000004823	1187.17	-1.30776	0.57717	-2.26582	0.0234624	0.0488563	asz1
ENSDARG00000004851	389.129	-1.21126	0.529088	-2.28933	0.02206	0.0463447	hinfp
ENSDARG00000004864	280.115	-8.55528	1.03631	-8.25555	1.51207e-16	6.53307e-15	zgc:171734
ENSDARG00000004866	551.723	-1.36735	0.502554	-2.72081	0.00651217	0.0163748	rfx5
ENSDARG00000004898	218.575	-3.79586	0.859289	-4.41745	9.98737e-06	5.70472e-05	zp2l2
ENSDARG00000004904	263.978	-3.42275	0.610978	-5.60208	2.11795e-08	2.23023e-07	gys2
ENSDARG00000004937	621.123	-2.65903	0.567608	-4.68463	2.80461e-06	1.82546e-05	skp2
ENSDARG00000004939	62.3542	-2.21939	0.828635	-2.67838	0.00739802	0.0182368	mtdhb
ENSDARG00000005015	554.604	-1.77297	0.49029	-3.61617	0.000298989	0.00114245	tspy
ENSDARG00000005026	514.56	-2.46483	0.552961	-4.45751	8.29154e-06	4.82164e-05	tshz1
ENSDARG00000005058	2917.8	-1.82	0.61571	-2.95594	0.00311717	0.00870987	ncapd2
ENSDARG00000005078	543.902	-1.32319	0.483546	-2.73642	0.00621116	0.0157033	eif4e3
ENSDARG00000005108	842.368	-2.1407	0.493563	-4.33724	1.44281e-05	7.91781e-05	oclna
ENSDARG00000005115	525.203	-3.20383	0.518362	-6.18069	6.38228e-10	9.3866e-09	calub
ENSDARG00000005122	1246.03	-1.75529	0.555873	-3.15771	0.00159012	0.00487284	atp2a2b
ENSDARG00000005128	1062.64	-1.10639	0.469788	-2.35508	0.0185187	0.039906	rnaseh2b
ENSDARG00000005230	2350.31	-1.50011	0.562154	-2.66851	0.00761883	0.0187126	ssr2
ENSDARG00000005246	816.644	-2.60456	0.632345	-4.11888	3.80716e-05	0.000186643	asb3
ENSDARG00000005355	1952.52	-5.00372	0.483984	-10.3386	4.71388e-25	5.72054e-23	larp6a
ENSDARG00000005364	94.0671	-3.12019	0.681903	-4.5757	4.74621e-06	2.93522e-05	grin3ba
ENSDARG00000005382	490.33	-1.66124	0.520892	-3.18922	0.00142658	0.00444278	prdm9
ENSDARG00000005392	91.3376	-3.32598	0.752995	-4.417	1.00078e-05	5.71346e-05	slc5a5
ENSDARG00000005448	461.936	-1.62676	0.515702	-3.15445	0.00160799	0.00492285	mtfmt
ENSDARG00000005458	891.93	-1.09772	0.47024	-2.33438	0.0195761	0.0417944	csnk1g2a
ENSDARG00000005540	805.258	-1.22879	0.484371	-2.53689	0.0111843	0.0258891	xpo7
ENSDARG00000005544	233.252	-3.81501	0.677307	-5.63262	1.77497e-08	1.89603e-07	btbd3a
ENSDARG00000005547	313.813	-1.65079	0.522115	-3.16172	0.00156838	0.00481751	rint1
ENSDARG00000005561	405.745	-1.57977	0.529571	-2.98311	0.00285334	0.008064	gfm2
ENSDARG00000005606	974.52	-1.64897	0.515846	-3.19664	0.00139038	0.00434286	paxip1
ENSDARG00000005612	871.474	-1.20261	0.494814	-2.43044	0.0150806	0.0334944	aph1b
ENSDARG00000005625	720.758	-2.48526	0.755523	-3.28945	0.00100382	0.00328366	maco1a
ENSDARG00000005640	212.109	-1.70833	0.551069	-3.10002	0.00193505	0.00576904	adat3
ENSDARG00000005643	628.159	-2.66361	0.497922	-5.34945	8.82234e-08	8.16701e-07	gcat
ENSDARG00000005651	317.824	-2.69516	0.534296	-5.04432	4.55138e-07	3.57162e-06	hrasb
ENSDARG00000005673	417.592	-2.93846	0.538573	-5.45601	4.86945e-08	4.7451e-07	f3b
ENSDARG00000005675	1754.27	-2.75373	0.546688	-5.03711	4.72612e-07	3.6892e-06	sec61a1l
ENSDARG00000005679	456.034	-1.57269	0.688497	-2.28423	0.0223578	0.0468598	trip10a
ENSDARG00000005699	2819.64	-3.83246	0.527406	-7.26663	3.68563e-13	9.35433e-12	ddx19
ENSDARG00000005772	892.617	-2.07603	0.499801	-4.15371	3.27132e-05	0.000163147	tsr2
ENSDARG00000005774	4936.32	-1.51514	0.456873	-3.31632	0.000912107	0.00302691	ddx3xb
ENSDARG00000005786	11.1204	-6.66721	2.12833	-3.1326	0.00173268	0.00524743	ppm1f
ENSDARG00000005799	983.374	-2.76838	0.532072	-5.20301	1.96082e-07	1.68066e-06	smim14
ENSDARG00000005827	1469.18	-1.56532	0.465118	-3.36543	0.000764251	0.00258569	eif2s1a
ENSDARG00000005840	1638.94	-1.76982	0.507961	-3.48416	0.00049368	0.00177176	got2b
ENSDARG00000005846	18.6958	-5.79007	1.8249	-3.17282	0.00150965	0.00466552	SP5 (1 of many)
ENSDARG00000005897	93.0177	-1.79754	0.648369	-2.7724	0.00556441	0.014301	dera
ENSDARG00000005927	564.719	-1.8925	0.500397	-3.78199	0.000155581	0.000641265	tbc1d17
ENSDARG00000006003	2138.17	-4.04609	0.462314	-8.75182	2.0993e-18	1.17434e-16	mycla
ENSDARG00000006019	3173.41	-1.85201	0.457986	-4.04381	5.2589e-05	0.000247961	tktb
ENSDARG00000006025	339.907	-2.08542	0.64588	-3.2288	0.00124313	0.00393604	tp53i11b
ENSDARG00000006029	456.028	-1.25204	0.492496	-2.54223	0.0110149	0.0255522	lta4h
ENSDARG00000006044	138.977	-1.86749	0.684516	-2.72819	0.00636832	0.0160677	ust
ENSDARG00000006062	1608.27	-3.18519	0.475725	-6.69543	2.15031e-11	4.08504e-10	akap1b
ENSDARG00000006065	16.0188	-3.9757	1.51665	-2.62137	0.00875774	0.0211003	znf385b
ENSDARG00000006074	748.516	-3.03345	0.642942	-4.71807	2.3809e-06	1.57133e-05	uck2a
ENSDARG00000006112	763.385	-2.02791	0.557685	-3.6363	0.000276583	0.00106527	myof
ENSDARG00000006151	73.3086	-2.80724	0.776535	-3.61508	0.000300253	0.00114689	pde11al
ENSDARG00000006225	2126.79	-1.91483	0.498755	-3.83922	0.000123427	0.000524405	ddx39aa
ENSDARG00000006251	733.76	-1.54454	0.57263	-2.69727	0.00699105	0.0174036	ell2
ENSDARG00000006257	2846.67	-4.58209	0.73101	-6.26817	3.65312e-10	5.61054e-09	vldlr
ENSDARG00000006260	7223.05	-1.59171	0.457533	-3.47889	0.000503495	0.00180349	tuba8l4
ENSDARG00000006301	155.869	-2.34107	0.734533	-3.18715	0.00143683	0.00446972	raph1a
ENSDARG00000006345	316.562	-2.36044	0.558316	-4.22778	2.36011e-05	0.000122176	med17
ENSDARG00000006368	34.0488	-2.09996	0.924248	-2.27208	0.0230817	0.0481584	crlf1b
ENSDARG00000006385	738.876	-1.15785	0.502305	-2.30508	0.0211621	0.0446568	triobpb
ENSDARG00000006389	1497.24	-2.94351	0.464727	-6.33384	2.39126e-10	3.82878e-09	smad2
ENSDARG00000006392	775.843	-1.66431	0.533566	-3.11922	0.00181332	0.00545456	exosc9
ENSDARG00000006408	1603.29	-3.46109	0.520538	-6.64906	2.94966e-11	5.46339e-10	hmgb3b
ENSDARG00000006422	88.1898	-2.02852	0.770828	-2.63161	0.00849818	0.0205698	esyt3
ENSDARG00000006434	889.871	-2.39554	0.486037	-4.92871	8.27724e-07	6.10295e-06	polr1e
ENSDARG00000006527	1266.88	-2.64746	0.496189	-5.33559	9.52321e-08	8.73931e-07	brd3a
ENSDARG00000006553	831.176	-1.67939	0.538608	-3.11801	0.00182075	0.00547525	rras
ENSDARG00000006580	6921.03	-10.1927	0.712743	-14.3006	2.16816e-46	1.85194e-43	cldnd
ENSDARG00000006585	45.4949	-2.73078	0.835344	-3.26905	0.00107908	0.00349029	DMWD
ENSDARG00000006600	824.549	-2.7448	0.47949	-5.72441	1.03792e-08	1.16591e-07	lsm14aa
ENSDARG00000006604	468.01	-2.98727	0.56847	-5.25492	1.48087e-07	1.30143e-06	nectin3b
ENSDARG00000006609	906.482	-1.11398	0.49085	-2.26948	0.0232391	0.0484504	map2k2a
ENSDARG00000006624	852.923	-1.42959	0.549161	-2.60322	0.00923515	0.022046	ppp2r2ab
ENSDARG00000006640	346.5	-5.99508	0.64961	-9.22874	2.73827e-20	1.96801e-18	eomesa
ENSDARG00000006754	381.307	-3.11009	0.533058	-5.83443	5.39745e-09	6.47825e-08	mllt3
ENSDARG00000006766	1173.4	-1.35406	0.581575	-2.32826	0.0198983	0.0423962	snd1
ENSDARG00000006791	837.324	-1.57373	0.487023	-3.23133	0.00123214	0.00390795	arntl1a
ENSDARG00000006797	85.6929	-2.47963	0.775698	-3.19664	0.00139037	0.00434286	nt5dc1
ENSDARG00000006816	90.8398	-4.09157	0.745968	-5.48492	4.13666e-08	4.09207e-07	gtf2f2b
ENSDARG00000006818	209.953	-2.61091	0.58588	-4.45638	8.33539e-06	4.84207e-05	urod
ENSDARG00000006899	170.156	-2.21963	0.589183	-3.76731	0.000165018	0.000675649	far1
ENSDARG00000006900	1508.72	-2.45488	0.622173	-3.94565	7.95827e-05	0.000356325	impdh2
ENSDARG00000007081	823.838	-1.33589	0.475777	-2.80782	0.00498784	0.0130394	pias4a
ENSDARG00000007092	637.522	-1.87934	0.528126	-3.55851	0.000372968	0.00138904	xab2
ENSDARG00000007099	1064.24	-2.4297	0.55004	-4.41732	9.99327e-06	5.70662e-05	cx43.4
ENSDARG00000007108	267.083	-2.6521	0.595365	-4.45457	8.406e-06	4.87416e-05	lipia
ENSDARG00000007172	40.3906	-3.57214	1.18651	-3.01062	0.00260718	0.00745753	plxna3
ENSDARG00000007179	733.115	-1.711	0.47489	-3.60294	0.000314643	0.00119401	sash1a
ENSDARG00000007181	703.613	-2.8756	0.514056	-5.59394	2.21969e-08	2.32632e-07	nadk2
ENSDARG00000007186	49.583	-2.61737	0.887751	-2.94832	0.00319507	0.00890402	ppp1r8a
ENSDARG00000007207	272.194	-4.69143	0.644787	-7.27594	3.44011e-13	8.77129e-12	cnpy2
ENSDARG00000007244	160.671	-1.69435	0.572014	-2.96209	0.00305562	0.00856268	acp2
ENSDARG00000007250	517.542	-2.07762	0.501822	-4.14016	3.47065e-05	0.000171738	use1
ENSDARG00000007271	942.985	-2.71568	0.483385	-5.61805	1.93127e-08	2.04528e-07	mynn
ENSDARG00000007278	1012.44	-2.60664	0.624098	-4.17666	2.95825e-05	0.000149379	ect2
ENSDARG00000007279	530.507	-2.10859	0.488275	-4.31845	1.57127e-05	8.52128e-05	yipf5
ENSDARG00000007315	440.881	-1.81443	0.51569	-3.51845	0.000434073	0.00158603	tmpoa
ENSDARG00000007383	125.917	-4.47768	0.75586	-5.92395	3.14297e-09	3.97263e-08	kcnk6
ENSDARG00000007387	306.62	-2.00409	0.609343	-3.28893	0.00100568	0.00328783	irf2a
ENSDARG00000007418	511.109	-2.22062	0.532061	-4.17362	2.99799e-05	0.000151077	chmp4c
ENSDARG00000007443	363.09	-2.47985	0.529603	-4.68247	2.83439e-06	1.84107e-05	fbxl18
ENSDARG00000007449	1111.83	-2.15477	0.528938	-4.07377	4.62583e-05	0.000221976	slc25a39
ENSDARG00000007461	36.6247	-3.43328	1.23814	-2.77294	0.00555526	0.0142824	srgap1a
ENSDARG00000007494	1080.02	-6.21155	0.538909	-11.5262	9.73998e-31	2.02155e-28	st3gal8
ENSDARG00000007496	682.715	-1.93407	0.513149	-3.76902	0.000163891	0.000671654	ufl1
ENSDARG00000007531	470.291	-2.05511	0.542339	-3.78935	0.000151041	0.000624757	zcchc9
ENSDARG00000007566	333.631	-1.2246	0.514973	-2.37799	0.0174075	0.0378931	appbp2
ENSDARG00000007614	152.588	-2.97932	0.665565	-4.47638	7.59198e-06	4.45568e-05	wwox
ENSDARG00000007630	320.232	-3.06288	0.552472	-5.54396	2.95705e-08	3.02071e-07	mkrn2
ENSDARG00000007639	900.573	-1.9401	0.502844	-3.85826	0.000114196	0.000489244	cnot4b
ENSDARG00000007657	755.963	-2.43658	0.483925	-5.03503	4.77771e-07	3.72554e-06	ccnh
ENSDARG00000007691	790.847	-1.28814	0.526206	-2.44798	0.0143659	0.032119	cul1b
ENSDARG00000007722	246.961	-2.16775	0.549039	-3.94826	7.87212e-05	0.000353178	nudt8
ENSDARG00000007737	693.88	-1.55282	0.521826	-2.97575	0.00292274	0.00823292	zyg11
ENSDARG00000007744	911.103	-1.72067	0.47873	-3.59423	0.000325347	0.00123005	tsr1
ENSDARG00000007751	2265.27	-1.35762	0.581418	-2.33501	0.0195431	0.0417441	lmnl3
ENSDARG00000007755	339.291	-1.60067	0.536476	-2.98368	0.00284805	0.00805624	wdr61
ENSDARG00000007764	487.811	-2.40698	0.532821	-4.51744	6.25924e-06	3.75082e-05	klhdc10
ENSDARG00000007786	455.565	-1.50114	0.624311	-2.40448	0.0161955	0.0355862	tmx2b
ENSDARG00000007812	610.221	-1.68543	0.601192	-2.80348	0.00505551	0.0131915	sp3b
ENSDARG00000007813	382.071	-1.66435	0.551236	-3.01931	0.00253351	0.00728151	rnpepl1
ENSDARG00000007823	241.51	-1.31351	0.555353	-2.36519	0.0180211	0.0389956	atf3
ENSDARG00000007836	5304.81	-2.7138	0.462939	-5.86211	4.57012e-09	5.57655e-08	ctsla
ENSDARG00000007918	865.109	-3.49635	0.484678	-7.21376	5.44286e-13	1.33563e-11	ttc27
ENSDARG00000007923	730.711	-2.06415	0.493491	-4.18275	2.88e-05	0.000145856	ptpn1
ENSDARG00000007943	426.027	-1.91855	0.55037	-3.48593	0.000490436	0.0017624	gabpb2a
ENSDARG00000008032	1910.22	-2.22355	0.457449	-4.86076	1.16937e-06	8.30487e-06	sart3
ENSDARG00000008068	473.724	-1.70782	0.508765	-3.35679	0.00078854	0.00265981	tma16
ENSDARG00000008105	779.356	-2.34184	0.483235	-4.84617	1.25866e-06	8.86809e-06	mettl2a
ENSDARG00000008107	185.176	-1.98309	0.637815	-3.10919	0.00187601	0.00561467	src
ENSDARG00000008153	426.268	-2.23976	0.513083	-4.3653	1.26949e-05	7.08005e-05	serinc5
ENSDARG00000008184	1056.56	-2.0387	0.493017	-4.13515	3.5472e-05	0.000175097	mia3
ENSDARG00000008192	49.4531	-3.19386	0.921993	-3.46408	0.000532051	0.00189022	pank1a
ENSDARG00000008200	930.072	-1.69868	0.631057	-2.6918	0.00710679	0.0176226	ugp2b
ENSDARG00000008224	969.439	-1.17313	0.482756	-2.43006	0.0150962	0.0335256	vps35
ENSDARG00000008235	129.409	-2.64004	0.614766	-4.29438	1.7518e-05	9.37445e-05	cog5
ENSDARG00000008238	480.547	-2.36389	0.690135	-3.42526	0.00061421	0.00213799	manba
ENSDARG00000008255	1144.91	-2.85371	0.558567	-5.10899	3.23891e-07	2.62613e-06	cnot6a
ENSDARG00000008287	221.115	-1.27767	0.536671	-2.38073	0.0172785	0.0376529	fam114a1
ENSDARG00000008322	116.183	-2.38358	0.790219	-3.01635	0.00255838	0.00734347	ambra1a
ENSDARG00000008380	924.594	-1.09919	0.467808	-2.34967	0.0187903	0.040369	brd7
ENSDARG00000008395	998.31	-2.32606	0.499047	-4.661	3.14675e-06	2.02736e-05	snupn
ENSDARG00000008396	224.83	-1.58875	0.669853	-2.37179	0.017702	0.0383962	ftr24
ENSDARG00000008407	187.073	-2.39928	0.637436	-3.76396	0.000167241	0.000683023	tspan7b
ENSDARG00000008454	3147.02	-5.38657	0.502036	-10.7295	7.40249e-27	1.0471e-24	cpeb1b
ENSDARG00000008461	472.381	-2.84931	0.534027	-5.33552	9.52731e-08	8.73947e-07	anapc5
ENSDARG00000008490	609.907	-1.59862	0.557018	-2.86996	0.00410529	0.0110336	ltv1
ENSDARG00000008541	2517.99	-7.85451	0.679995	-11.5508	7.31058e-31	1.54622e-28	chia.4
ENSDARG00000008592	364.361	-1.48123	0.554049	-2.67345	0.00750744	0.0184676	mtmr8
ENSDARG00000008593	147.052	-2.92634	0.907663	-3.22404	0.00126396	0.00399078	nbas
ENSDARG00000008662	55.997	-4.03201	0.936935	-4.30341	1.6819e-05	9.05494e-05	fign
ENSDARG00000008732	842.09	-4.82793	0.596303	-8.09643	5.65945e-16	2.21667e-14	zgc:66479
ENSDARG00000008805	1024.54	-2.17513	0.479016	-4.54083	5.60321e-06	3.40082e-05	orc3
ENSDARG00000008807	480.073	-3.58396	0.513679	-6.97705	3.01452e-12	6.58273e-11	bokb
ENSDARG00000008808	784.791	-2.10937	0.489413	-4.31001	1.63251e-05	8.81039e-05	eml2
ENSDARG00000008835	231.284	-3.85124	1.31194	-2.93553	0.0033298	0.00923314	si:dkey-46g23.5
ENSDARG00000008840	351.456	-1.51203	0.519506	-2.91052	0.0036083	0.00987835	hmbsa
ENSDARG00000008852	262.4	-1.92664	0.550334	-3.50086	0.000463761	0.00168013	elp4
ENSDARG00000008859	674.479	-3.11289	0.666941	-4.66742	3.05003e-06	1.96983e-05	mylipa
ENSDARG00000008861	104.571	-5.86735	0.877235	-6.68845	2.25541e-11	4.27374e-10	tfap2e
ENSDARG00000008920	466.334	-1.46529	0.569385	-2.57347	0.0100684	0.0237015	mrpl53
ENSDARG00000008946	261.92	-2.06346	0.715892	-2.88237	0.00394701	0.0106766	ccdc127b
ENSDARG00000008953	313.639	-3.19836	0.563083	-5.68009	1.34624e-08	1.47277e-07	pofut1
ENSDARG00000008979	596.863	-1.68309	0.490756	-3.42959	0.000604495	0.00210929	golga1
ENSDARG00000009001	1648.55	-2.57931	0.501995	-5.13812	2.77494e-07	2.2969e-06	pdia6
ENSDARG00000009023	1191.07	-1.78623	0.516711	-3.45692	0.000546395	0.00193345	ankrd28b
ENSDARG00000009031	552.34	-1.89096	0.638297	-2.9625	0.00305152	0.00855225	tnikb
ENSDARG00000009094	41.1874	-4.32302	1.07009	-4.03988	5.34783e-05	0.000251727	gata2b
ENSDARG00000009142	767.751	-2.323	0.515045	-4.51028	6.47421e-06	3.86399e-05	ppp1r13bb
ENSDARG00000009208	997.019	-2.27528	0.557111	-4.08408	4.42524e-05	0.000213596	prkcda
ENSDARG00000009266	330.435	-2.94084	0.594537	-4.94644	7.55814e-07	5.6331e-06	uevld
ENSDARG00000009273	431.367	-1.64905	0.558449	-2.95291	0.00314794	0.0087859	ppm1da
ENSDARG00000009351	5.9705	-5.76992	2.52701	-2.2833	0.0224128	0.0469614	fgf6a
ENSDARG00000009436	585.11	-1.5264	0.504315	-3.02668	0.00247256	0.00713495	ubxn7
ENSDARG00000009534	758.261	-1.90361	0.534582	-3.56092	0.000369554	0.00137887	wls
ENSDARG00000009629	600.035	-1.48656	0.549949	-2.7031	0.00686969	0.017138	unc119.1
ENSDARG00000009677	497.566	-1.93504	0.598735	-3.23188	0.0012298	0.00390274	dlg1
ENSDARG00000009693	385.384	-2.74098	0.511496	-5.35875	8.37977e-08	7.79631e-07	llgl1
ENSDARG00000009735	1268.77	-1.08775	0.463395	-2.34736	0.0189071	0.0405767	gigyf2
ENSDARG00000009740	1169.6	-1.33303	0.506931	-2.62961	0.00854835	0.0206709	ppp1r7
ENSDARG00000009745	497.247	-1.34117	0.526282	-2.54839	0.010822	0.0251634	fbxw2
ENSDARG00000009779	5421.21	-2.05784	0.667715	-3.08191	0.00205674	0.00607636	mcl1a
ENSDARG00000009783	489.069	-1.61409	0.52105	-3.09776	0.00194986	0.00580463	dirc2
ENSDARG00000009837	307.966	-1.46696	0.531738	-2.75879	0.0058015	0.0148364	agk
ENSDARG00000009862	348.217	-2.65672	0.567552	-4.68102	2.85445e-06	1.85302e-05	dcps
ENSDARG00000009871	956.718	-1.54898	0.471238	-3.28704	0.00101245	0.00330655	snrpc
ENSDARG00000009885	15.6997	-3.8817	1.40549	-2.76181	0.00574816	0.014717	sult3st1
ENSDARG00000009886	95.793	-1.83021	0.716381	-2.5548	0.0106249	0.0247986	rnf114
ENSDARG00000009942	1983.97	-1.85374	0.535305	-3.46297	0.000534251	0.00189629	cdc6
ENSDARG00000009953	695.377	-2.05279	0.504582	-4.06829	4.73593e-05	0.000226574	med14
ENSDARG00000009958	71.0937	-1.96285	0.722734	-2.71586	0.00661036	0.0165842	cbl
ENSDARG00000009961	56.3517	-2.45815	0.906564	-2.71151	0.00669783	0.0167808	rundc3b
ENSDARG00000010010	202.214	-1.4404	0.55977	-2.5732	0.0100764	0.0237152	trim13
ENSDARG00000010031	253.582	-2.4524	0.598613	-4.0968	4.18892e-05	0.000203294	ssh1b
ENSDARG00000010047	434.576	-2.96948	0.587274	-5.05638	4.27282e-07	3.3709e-06	neu3.2
ENSDARG00000010098	107.518	-1.56092	0.623141	-2.50492	0.012248	0.027981	pank1b
ENSDARG00000010108	63.2554	-2.10403	0.729883	-2.8827	0.00394288	0.0106674	bri3bp
ENSDARG00000010181	126.488	-3.01045	0.710732	-4.2357	2.27842e-05	0.00011825	asap2a
ENSDARG00000010255	720.096	-2.0067	0.481473	-4.16783	3.07508e-05	0.000154505	bin2b
ENSDARG00000010266	810.278	-2.88599	0.662623	-4.35539	1.32827e-05	7.35869e-05	igf2bp3
ENSDARG00000010281	1032.25	-1.895	0.559981	-3.38404	0.000714281	0.00244569	xpo4
ENSDARG00000010332	4724.11	-7.35725	0.620367	-11.8595	1.92075e-32	4.63652e-30	zgc:56231
ENSDARG00000010400	641.041	-1.32697	0.488029	-2.71905	0.00654707	0.0164458	lrrfip2
ENSDARG00000010420	148.602	-3.47145	1.1056	-3.13987	0.00169023	0.00514059	ndrg1b
ENSDARG00000010432	438.085	-1.78067	0.500024	-3.56117	0.000369205	0.00137827	eaf2
ENSDARG00000010487	934.459	-1.30772	0.485541	-2.69333	0.00707416	0.0175593	sae1
ENSDARG00000010524	244.828	-3.71444	0.586002	-6.3386	2.31859e-10	3.71778e-09	si:ch211-282j22.3
ENSDARG00000010553	938.849	-1.26698	0.489932	-2.58603	0.00970889	0.0230296	mmgt1
ENSDARG00000010563	843.434	-1.19779	0.471857	-2.53845	0.0111345	0.0257928	spopla
ENSDARG00000010572	1921.84	-1.77197	0.526104	-3.36809	0.000756898	0.00256511	slc25a25a
ENSDARG00000010583	366.032	-3.33286	0.574646	-5.79984	6.63773e-09	7.79262e-08	pard3ab
ENSDARG00000010596	1309.56	-2.1393	0.500619	-4.27331	1.92591e-05	0.000101956	slc7a6os
ENSDARG00000010658	463.536	-1.94398	0.520285	-3.73639	0.000186683	0.000754342	insig1
ENSDARG00000010673	328.079	-2.70642	0.726006	-3.72782	0.000193146	0.000777485	trim16
ENSDARG00000010717	795.325	-1.32455	0.492053	-2.69189	0.00710494	0.0176199	chchd10
ENSDARG00000010727	254.779	-4.39503	0.584849	-7.51481	5.69922e-14	1.68983e-12	ttyh2l
ENSDARG00000010752	376.299	-1.92001	0.559744	-3.43017	0.000603214	0.00210599	acsl4b
ENSDARG00000010758	17.7734	-5.30561	1.60252	-3.31079	0.000930331	0.00307727	capn12
ENSDARG00000010792	2008.35	-1.4095	0.545065	-2.58592	0.00971185	0.023033	cdc25b
ENSDARG00000010862	434.555	-2.11763	0.499358	-4.2407	2.22825e-05	0.000115944	amt
ENSDARG00000010905	304.972	-2.51273	0.574347	-4.37493	1.21472e-05	6.79683e-05	mettl13
ENSDARG00000010941	130.227	-2.64372	0.62892	-4.2036	2.62708e-05	0.000134491	pomgnt2
ENSDARG00000010981	166.169	-2.834	0.650094	-4.35938	1.30432e-05	7.24512e-05	zdhhc3a
ENSDARG00000011026	183.081	-1.84319	0.565661	-3.25848	0.00112012	0.00360257	zgc:92907
ENSDARG00000011049	399.37	-5.00113	0.574053	-8.71196	2.98655e-18	1.62961e-16	slc17a9b
ENSDARG00000011094	2896.68	-1.49046	0.649408	-2.29511	0.0217271	0.0457057	ccna2
ENSDARG00000011125	4898.99	-1.07419	0.474759	-2.26259	0.0236611	0.0491939	snrpb
ENSDARG00000011190	39.9911	-4.2702	1.01744	-4.19702	2.7045e-05	0.000138007	fgfr1b
ENSDARG00000011196	817.614	-1.40793	0.501561	-2.8071	0.00499898	0.0130639	dnajc11a
ENSDARG00000011233	285.696	-3.08094	0.550826	-5.5933	2.22793e-08	2.33387e-07	pcyt1aa
ENSDARG00000011239	497.517	-3.54736	0.551215	-6.43553	1.23044e-10	2.06543e-09	ppp1r14aa
ENSDARG00000011246	499.12	-1.72702	0.502461	-3.43713	0.000587921	0.00206004	krr1
ENSDARG00000011262	496.946	-2.34821	0.602083	-3.90015	9.6135e-05	0.000420434	traip
ENSDARG00000011299	546.008	-2.20381	0.524367	-4.20279	2.63642e-05	0.000134907	blzf1
ENSDARG00000011333	34.4271	-2.64941	0.981234	-2.70008	0.00693219	0.0172745	arhgap33
ENSDARG00000011373	964.581	-1.99798	0.810511	-2.46509	0.0136978	0.0308083	mknk2a
ENSDARG00000011404	1846.35	-1.70335	0.48714	-3.49664	0.000471159	0.00170304	fen1
ENSDARG00000011418	774.8	-1.61458	0.492743	-3.27671	0.00105023	0.00340838	sigmar1
ENSDARG00000011445	171.353	-1.51621	0.608667	-2.49103	0.0127374	0.028956	elmsan1a
ENSDARG00000011498	349.633	-2.30875	0.531582	-4.34317	1.40443e-05	7.73167e-05	si:ch211-212o1.2
ENSDARG00000011506	603.283	-3.12409	0.550107	-5.67906	1.35435e-08	1.47945e-07	lpcat1
ENSDARG00000011571	47.3555	-2.74531	0.85538	-3.20946	0.00132983	0.00417485	calcrlb
ENSDARG00000011597	1876.95	-1.91532	0.499708	-3.83287	0.000126656	0.000535871	atxn2l
ENSDARG00000011683	422.662	-4.18638	0.546728	-7.65716	1.90094e-14	5.98809e-13	prtfdc1
ENSDARG00000011743	600.031	-2.11486	0.510337	-4.14405	3.4123e-05	0.000169266	pigo
ENSDARG00000011764	805.586	-1.53193	0.487456	-3.1427	0.00167397	0.00509882	ints13
ENSDARG00000011769	662.239	-2.69064	0.694073	-3.8766	0.000105928	0.00045751	cpm
ENSDARG00000011801	267.718	-2.42368	0.541099	-4.47919	7.49274e-06	4.40558e-05	wars2
ENSDARG00000011837	95.8078	-2.51062	0.898959	-2.79281	0.00522532	0.0135946	zgc:100846
ENSDARG00000011855	125.958	-4.72845	0.718327	-6.58258	4.62352e-11	8.2739e-10	aak1a
ENSDARG00000011863	174.184	-3.14174	0.732292	-4.29029	1.78444e-05	9.53073e-05	ptk7a
ENSDARG00000011885	724.342	-1.39071	0.477464	-2.9127	0.00358324	0.00982549	mrpl19
ENSDARG00000011909	193.109	-3.78185	0.643472	-5.87726	4.17112e-09	5.13935e-08	itpr2
ENSDARG00000011925	301.119	-1.32504	0.537542	-2.46501	0.0137011	0.0308125	spns1
ENSDARG00000011934	6696.26	-3.88624	0.516833	-7.51934	5.50552e-14	1.63458e-12	gyg1a
ENSDARG00000011945	427.581	-1.36257	0.517865	-2.63112	0.00851043	0.0205927	slc35e1
ENSDARG00000011958	654.809	-1.48774	0.550378	-2.70313	0.00686905	0.017138	ctnnbl1
ENSDARG00000012002	451.104	-2.25646	0.496498	-4.54475	5.49995e-06	3.34546e-05	slc38a7
ENSDARG00000012051	607.775	-3.47075	0.499452	-6.94911	3.67586e-12	7.94099e-11	mettl21a
ENSDARG00000012113	321.161	-2.04352	0.514527	-3.97166	7.13738e-05	0.000324212	c19h1orf109
ENSDARG00000012135	367.474	-2.44031	0.514434	-4.74368	2.0987e-06	1.40724e-05	fbxl2
ENSDARG00000012192	286.392	-2.06792	0.543565	-3.80436	0.000142173	0.000592379	cant1a
ENSDARG00000012199	757.354	-1.5157	0.478172	-3.16978	0.00152554	0.00470676	gpt2
ENSDARG00000012215	1248.28	-3.01163	0.542141	-5.55508	2.77489e-08	2.84773e-07	umps
ENSDARG00000012219	428.806	-2.86143	0.520946	-5.49276	3.95691e-08	3.93529e-07	dpf2
ENSDARG00000012222	637.177	-3.1851	0.554756	-5.74144	9.38738e-09	1.06365e-07	nup35
ENSDARG00000012234	1089.15	-1.4535	0.46511	-3.12507	0.00177761	0.00536301	psme3
ENSDARG00000012295	372.88	-2.00816	0.523734	-3.83432	0.000125914	0.000533134	bcs1l
ENSDARG00000012306	470.382	-4.04636	0.597294	-6.77448	1.24853e-11	2.47566e-10	syt13
ENSDARG00000012369	3645.73	-5.53871	0.554327	-9.99178	1.65579e-23	1.74274e-21	rdh10b
ENSDARG00000012390	377.734	-2.62624	0.54824	-4.79031	1.66522e-06	1.1428e-05	kcnk5b
ENSDARG00000012399	1366.79	-1.40372	0.468477	-2.99635	0.00273234	0.00776951	adssl
ENSDARG00000012407	856.177	-2.62196	0.477092	-5.49571	3.8915e-08	3.87719e-07	mgat1a
ENSDARG00000012432	915.605	-2.69967	0.476753	-5.66262	1.49076e-08	1.61575e-07	fam76b
ENSDARG00000012458	908.526	-1.0736	0.474818	-2.26108	0.0237542	0.0493483	zgc:77849
ENSDARG00000012460	121.931	-1.80167	0.713876	-2.52378	0.01161	0.0267268	rassf4
ENSDARG00000012467	218.951	-2.93303	0.618392	-4.74299	2.10588e-06	1.41163e-05	spint1b
ENSDARG00000012468	234.192	-2.12251	0.777528	-2.72981	0.00633701	0.0159996	aacs
ENSDARG00000012485	2202.73	-2.50128	0.708889	-3.52846	0.000417992	0.00153612	aurka
ENSDARG00000012495	1568.98	-1.47421	0.462468	-3.18769	0.00143415	0.00446384	mphosph10
ENSDARG00000012563	421.809	-2.58845	0.5049	-5.12666	2.94931e-07	2.4187e-06	pdss2
ENSDARG00000012572	625.859	-1.49781	0.553353	-2.70679	0.00679382	0.0169697	polr3f
ENSDARG00000012588	562.635	-2.9346	0.524368	-5.59645	2.18789e-08	2.29517e-07	ptdss1a
ENSDARG00000012674	242.748	-1.84167	0.546039	-3.37278	0.000744123	0.00252606	rpusd4
ENSDARG00000012718	2069.69	-3.04351	0.500173	-6.08492	1.16549e-09	1.62474e-08	wee2
ENSDARG00000012726	85.5572	-2.88367	0.718813	-4.01172	6.02784e-05	0.000279879	calhm5.2
ENSDARG00000012796	369.033	-4.60161	0.642395	-7.16321	7.8812e-13	1.88402e-11	hnmt
ENSDARG00000012816	464.053	-4.00366	0.542232	-7.38366	1.53991e-13	4.17563e-12	dia1a
ENSDARG00000012860	1108.19	-7.85299	0.626868	-12.5273	5.29046e-36	1.75359e-33	tmprss4b
ENSDARG00000012887	548.264	-1.32169	0.519683	-2.54326	0.0109823	0.0254827	znf143a
ENSDARG00000012892	435.895	-2.97416	0.57976	-5.12999	2.89754e-07	2.38328e-06	ammecr1
ENSDARG00000012899	530.953	-2.06822	0.509638	-4.05821	4.94509e-05	0.000235212	ddx49
ENSDARG00000012932	832.894	-1.20652	0.472389	-2.55407	0.0106472	0.0248333	mat2b
ENSDARG00000012942	627.144	-2.48026	0.492633	-5.0347	4.78595e-07	3.73065e-06	itgb5
ENSDARG00000012972	880.523	-2.56751	0.531147	-4.83389	1.33891e-06	9.37409e-06	cfl1l
ENSDARG00000012981	1108.51	-1.99098	0.60698	-3.28015	0.00103752	0.00337353	osbpl7
ENSDARG00000012987	1738.07	-1.11436	0.484328	-2.30083	0.0214014	0.0451017	gpia
ENSDARG00000013022	80.5898	-1.88035	0.738121	-2.54748	0.0108503	0.0252211	si:ch211-59h6.1
ENSDARG00000013063	356.905	-1.95771	0.584378	-3.35007	0.000807906	0.0027156	oxct1a
ENSDARG00000013076	619.359	-1.67504	0.483053	-3.46762	0.000525093	0.00186819	bmi1b
ENSDARG00000013082	455.716	-1.44371	0.560368	-2.57636	0.00998479	0.0235445	uap1l1
ENSDARG00000013117	552.649	-2.58806	0.520696	-4.97039	6.68197e-07	5.04739e-06	hiat1a
ENSDARG00000013224	228.596	-2.34841	0.612833	-3.83206	0.000127075	0.000537334	phc2b
ENSDARG00000013236	144.478	-3.20576	0.625122	-5.12821	2.92505e-07	2.40305e-06	dhcr24
ENSDARG00000013245	91.1269	-4.27971	0.768109	-5.57175	2.52188e-08	2.61222e-07	wbp1la
ENSDARG00000013302	986.25	-1.53551	0.547687	-2.80362	0.00505318	0.013187	gpx8
ENSDARG00000013457	1028.96	-1.78746	0.543922	-3.28625	0.00101531	0.00331346	mtrex
ENSDARG00000013561	846.048	-1.74784	0.498953	-3.503	0.000460041	0.00166829	pgm1
ENSDARG00000013670	2734.79	-3.2508	0.49195	-6.608	3.89556e-11	7.07381e-10	hyou1
ENSDARG00000013681	613.47	-1.32494	0.536217	-2.4709	0.0134774	0.0303904	si:dkey-42i9.6
ENSDARG00000013694	505.725	-2.40388	0.885109	-2.71591	0.00660939	0.0165836	stimate
ENSDARG00000013704	195.148	-4.4666	0.625784	-7.1376	9.49775e-13	2.24151e-11	cers2a
ENSDARG00000013719	954.265	-1.99609	0.538564	-3.70632	0.000210296	0.000837714	gtse1
ENSDARG00000013763	1686.97	-1.28627	0.46172	-2.78582	0.00533933	0.0138297	rrbp1a
ENSDARG00000013776	3939.68	-2.88284	0.495323	-5.82013	5.88007e-09	6.97195e-08	thop1
ENSDARG00000013784	157.052	-1.76058	0.654217	-2.69113	0.00712104	0.0176539	zgc:77158
ENSDARG00000013795	339.858	-2.17495	0.545309	-3.98846	6.65034e-05	0.000304349	hps4
ENSDARG00000013802	546.971	-1.28167	0.501742	-2.55444	0.010636	0.0248132	pcid2
ENSDARG00000013828	34.9238	-2.24265	0.951132	-2.35787	0.0183799	0.0396563	snx13
ENSDARG00000013830	239.605	-1.81637	0.568789	-3.19341	0.00140605	0.00438551	osbpl2b
ENSDARG00000013839	419.088	-2.88717	0.526184	-5.48699	4.0884e-08	4.05154e-07	aldh3b1
ENSDARG00000013841	180.597	-1.46061	0.572707	-2.55037	0.0107609	0.0250593	abl2
ENSDARG00000013843	128.561	-2.28952	0.677353	-3.38009	0.000724621	0.00247157	sept5a
ENSDARG00000013860	167.895	-2.2665	0.573688	-3.95075	7.79067e-05	0.000350105	ptpmt1
ENSDARG00000013861	187.102	-2.00721	0.626273	-3.20501	0.00135057	0.00423218	armc1
ENSDARG00000013881	992.04	-2.02401	0.569864	-3.55174	0.00038269	0.0014212	pi4k2b
ENSDARG00000013933	327.254	-2.36669	0.536934	-4.40779	1.04431e-05	5.93451e-05	XRCC2
ENSDARG00000013946	1519.82	-1.9994	0.494135	-4.04626	5.20422e-05	0.000245696	ivns1abpb
ENSDARG00000013973	279.808	-1.22005	0.535921	-2.27655	0.0228134	0.0476837	pex3
ENSDARG00000014008	1587.92	-1.84584	0.458835	-4.02288	5.74899e-05	0.00026873	cwc22
ENSDARG00000014017	3939.29	-2.83919	0.46981	-6.04328	1.51015e-09	2.05122e-08	rrm1
ENSDARG00000014041	1602.08	-1.78994	0.517542	-3.45854	0.000543121	0.00192309	smarcad1a
ENSDARG00000014047	455.203	-2.98214	0.55917	-5.33316	9.65202e-08	8.84656e-07	cldn7b
ENSDARG00000014068	593.325	-1.37432	0.604135	-2.27485	0.0229148	0.0478641	pgam1b
ENSDARG00000014148	163.387	-1.88804	0.580665	-3.25152	0.0011479	0.00368444	med22
ENSDARG00000014161	474.299	-2.08348	0.508793	-4.09495	4.22266e-05	0.000204708	ercc4
ENSDARG00000014208	720.853	-3.97419	0.587467	-6.76495	1.33356e-11	2.62551e-10	zgc:77118
ENSDARG00000014324	103.941	-1.7605	0.77063	-2.28449	0.0223426	0.0468427	sh2d5
ENSDARG00000014340	87.9285	-3.19159	0.904351	-3.52915	0.000416899	0.00153286	rab11al
ENSDARG00000014348	274	-2.50221	0.560757	-4.4622	8.11227e-06	4.72606e-05	stk17b
ENSDARG00000014386	1261.97	-3.91417	0.605087	-6.46876	9.88089e-11	1.6802e-09	galnt6
ENSDARG00000014474	392.46	-2.00393	0.561257	-3.57043	0.000356393	0.00133605	yipf1
ENSDARG00000014577	333.4	-1.82017	0.703666	-2.5867	0.00968995	0.0229933	rhpn2
ENSDARG00000014599	273.679	-2.46188	0.586037	-4.20089	2.65863e-05	0.000135949	slc5a6b
ENSDARG00000014634	744.415	-1.86456	0.475525	-3.92106	8.81603e-05	0.000390013	mbtps1
ENSDARG00000014676	471.423	-2.00727	0.558236	-3.59574	0.000323474	0.0012238	bckdhb
ENSDARG00000014680	154.821	-5.13424	0.753295	-6.8157	9.38038e-12	1.90594e-10	znf710a
ENSDARG00000014692	557.511	-1.70366	0.526165	-3.23787	0.00120425	0.0038381	znf622
ENSDARG00000014717	212.033	-2.95795	0.683231	-4.32935	1.49548e-05	8.17016e-05	dync1h1
ENSDARG00000014761	349.875	-4.14474	0.556227	-7.45153	9.22628e-14	2.61682e-12	mfsd6l
ENSDARG00000014875	409.369	-1.86863	0.516622	-3.61701	0.000298028	0.00113957	abi2b
ENSDARG00000014914	4552.94	-3.72497	0.554147	-6.72199	1.79262e-11	3.45877e-10	lamp2
ENSDARG00000014943	3166.01	-1.6017	0.672074	-2.38322	0.0171621	0.0374361	kif23
ENSDARG00000014963	178.676	-1.33056	0.572646	-2.32352	0.0201512	0.0428512	triap1
ENSDARG00000014966	591.46	-1.98675	0.559531	-3.55074	0.00038415	0.00142567	ccdc82
ENSDARG00000014986	380.527	-1.59236	0.515807	-3.08712	0.00202103	0.00598362	acvr1l
ENSDARG00000014994	1237.26	-2.35897	0.484452	-4.86936	1.11961e-06	7.98466e-06	tbp
ENSDARG00000015003	110.28	-2.07495	0.631939	-3.28346	0.00102541	0.00333904	arhgap4b
ENSDARG00000015070	772.427	-1.84349	0.526335	-3.50249	0.000460924	0.00167122	pola2
ENSDARG00000015088	762.343	-1.51823	0.495298	-3.06528	0.00217465	0.00637975	dnajb11
ENSDARG00000015111	5749.06	-1.60632	0.466348	-3.44447	0.000572174	0.00201344	ddx39ab
ENSDARG00000015126	1114.83	-1.49449	0.483537	-3.09073	0.00199662	0.00592319	gorasp2
ENSDARG00000015153	144.362	-5.14515	0.727408	-7.07326	1.51331e-12	3.43988e-11	wdr91
ENSDARG00000015176	105.268	-2.57012	0.649657	-3.95612	7.61758e-05	0.000343216	ror1
ENSDARG00000015239	1434.42	-1.51463	0.500546	-3.02595	0.00247857	0.00714894	prpf19
ENSDARG00000015252	143.531	-3.12999	0.792298	-3.95052	7.79827e-05	0.000350291	st3gal3b
ENSDARG00000015290	394.284	-1.99909	0.52776	-3.78787	0.000151944	0.000627908	sacm1la
ENSDARG00000015293	155.379	-4.37417	0.888564	-4.92275	8.53378e-07	6.26883e-06	fam110a
ENSDARG00000015343	827.643	-2.08108	0.527093	-3.94821	7.87366e-05	0.000353178	pgd
ENSDARG00000015352	803.378	-1.80521	0.478348	-3.77383	0.000160758	0.000660153	lsg1
ENSDARG00000015422	609.68	-1.17026	0.486899	-2.40349	0.0162395	0.0356653	ppil1
ENSDARG00000015471	379.205	-1.19233	0.504128	-2.36513	0.0180238	0.0389977	chd1l
ENSDARG00000015524	938.029	-1.12163	0.472568	-2.37348	0.0176214	0.0382801	prps1a
ENSDARG00000015543	1004.22	-6.48489	0.561505	-11.5491	7.4586e-31	1.56265e-28	s100a1
ENSDARG00000015546	126.298	-4.44134	0.862688	-5.14826	2.62916e-07	2.18929e-06	alpl
ENSDARG00000015557	314.722	-1.84368	0.69277	-2.66131	0.00778362	0.0190457	zgc:100829
ENSDARG00000015576	430.087	-3.04217	0.744834	-4.08436	4.41979e-05	0.00021338	itprip
ENSDARG00000015628	674.845	-2.11312	0.489145	-4.32002	1.56017e-05	8.46937e-05	psmd10
ENSDARG00000015657	1533.92	-5.65731	0.577141	-9.80231	1.10044e-22	1.03994e-20	zgc:77112
ENSDARG00000015676	611.588	-1.92564	0.501728	-3.83801	0.000124037	0.000526291	nmd3
ENSDARG00000015686	46.1308	-2.60145	0.956336	-2.72023	0.00652366	0.0163981	bmp6
ENSDARG00000015709	863.074	-3.83523	0.656337	-5.84339	5.11482e-09	6.16331e-08	hsd17b12a
ENSDARG00000015759	596.073	-2.1938	0.554524	-3.95619	7.61541e-05	0.000343188	tspan7
ENSDARG00000015823	359.409	-1.34805	0.517901	-2.6029	0.00924378	0.0220619	vps26b
ENSDARG00000015824	542.071	-2.34382	0.676825	-3.46296	0.000534272	0.00189629	lemd3
ENSDARG00000015889	1898.12	-1.60627	0.513925	-3.12549	0.00177509	0.00535614	zc3h15
ENSDARG00000015905	746.702	-2.30502	0.6461	-3.56759	0.000360282	0.0013479	lztr1
ENSDARG00000015907	126.023	-1.96313	0.692174	-2.83619	0.00456558	0.0120878	dcbld1
ENSDARG00000015971	254.54	-2.52386	0.590005	-4.27769	1.88843e-05	0.000100139	rapgef1b
ENSDARG00000015989	177.554	-1.57317	0.564197	-2.78833	0.00529805	0.0137535	zdhhc16b
ENSDARG00000015998	846.338	-1.50275	0.524753	-2.86373	0.00418684	0.0112256	wdhd1
ENSDARG00000016056	183.505	-2.7244	0.640363	-4.25446	2.09553e-05	0.00010981	mhc1laa
ENSDARG00000016080	226.219	-1.88693	0.704859	-2.67702	0.00742792	0.0183064	nob1
ENSDARG00000016084	310.307	-3.2488	0.556897	-5.83376	5.41918e-09	6.49809e-08	spsb4a
ENSDARG00000016117	840.007	-2.76563	0.573642	-4.82117	1.42715e-06	9.92305e-06	exd2
ENSDARG00000016153	705.682	-1.23046	0.490923	-2.50642	0.0121961	0.027877	dag1
ENSDARG00000016154	264.713	-1.69741	0.694232	-2.44502	0.0144846	0.0323452	zfp36l1a
ENSDARG00000016163	1039.7	-1.43797	0.525105	-2.73845	0.00617301	0.0156228	usp33
ENSDARG00000016177	1093.88	-1.81281	0.468197	-3.8719	0.000107991	0.000464961	eif4enif1
ENSDARG00000016181	882.148	-1.35067	0.49152	-2.74794	0.00599715	0.0152472	trim33
ENSDARG00000016212	143.055	-2.48828	0.599989	-4.14722	3.36537e-05	0.000167274	nup214
ENSDARG00000016233	336.364	-1.19522	0.509998	-2.34359	0.0190994	0.0409391	sdr16c5a
ENSDARG00000016260	1250.77	-2.6785	0.514063	-5.21046	1.88375e-07	1.62003e-06	fxr2
ENSDARG00000016318	811.453	-1.5731	0.523547	-3.00469	0.00265848	0.00758375	med7
ENSDARG00000016350	1098.29	-3.58122	0.545437	-6.56578	5.17619e-11	9.17421e-10	cap1
ENSDARG00000016357	266.209	-1.66652	0.667418	-2.49697	0.012526	0.0285135	fmo5
ENSDARG00000016375	465.628	-2.76586	0.749968	-3.68797	0.00022605	0.00089183	asns
ENSDARG00000016399	897.227	-1.11459	0.474285	-2.35003	0.0187717	0.0403331	riok1
ENSDARG00000016447	872.419	-1.73747	0.562711	-3.08767	0.0020173	0.00597415	ythdf1
ENSDARG00000016454	81.3918	-2.7958	0.748355	-3.73593	0.000187022	0.000755575	esr2a
ENSDARG00000016470	585.044	-2.03784	0.765447	-2.66228	0.00776124	0.0190035	anxa5b
ENSDARG00000016474	817.946	-2.96859	0.521904	-5.68801	1.28531e-08	1.41308e-07	galcb
ENSDARG00000016484	1689.07	-1.52986	0.512516	-2.985	0.00283581	0.00802366	dkc1
ENSDARG00000016496	1270.78	-1.80594	0.477904	-3.77887	0.000157545	0.000648037	cdk8
ENSDARG00000016519	480.814	-2.26896	0.502209	-4.51797	6.24358e-06	3.74244e-05	ctdnep1a
ENSDARG00000016528	321.185	-1.4142	0.517893	-2.73068	0.0063203	0.0159592	wdcp
ENSDARG00000016532	611.296	-1.45288	0.57607	-2.52204	0.0116675	0.0268287	suco
ENSDARG00000016538	1715.85	-7.8177	0.624493	-12.5185	5.91704e-36	1.93243e-33	zgc:55888
ENSDARG00000016543	191.265	-1.62553	0.567013	-2.86683	0.00414601	0.0111295	mrm3a
ENSDARG00000016548	1452.86	-2.24844	0.527016	-4.26636	1.98688e-05	0.000104784	eif5b
ENSDARG00000016584	197.16	-2.14205	0.583206	-3.67289	0.000239821	0.000939156	rgs7a
ENSDARG00000016630	2247.68	-1.33767	0.474793	-2.81737	0.00484186	0.0127132	tprb
ENSDARG00000016674	41.669	-2.68441	0.86907	-3.08883	0.00200943	0.00595403	si:ch73-166o21.1
ENSDARG00000016676	123.702	-1.7107	0.75808	-2.25662	0.0240317	0.0498279	gnao1a
ENSDARG00000016691	661.114	-3.36726	0.631671	-5.33071	9.78269e-08	8.95154e-07	cd9b
ENSDARG00000016706	1235.38	-2.76533	0.523148	-5.28593	1.25068e-07	1.11726e-06	atic
ENSDARG00000016724	452.772	-1.65225	0.521525	-3.16811	0.00153432	0.00472924	zgc:162339
ENSDARG00000016743	478.163	-1.39878	0.618711	-2.2608	0.0237719	0.0493758	angel2
ENSDARG00000016745	460.38	-1.58802	0.522512	-3.03921	0.00237199	0.00687704	slc35f6
ENSDARG00000016749	139.417	-1.72996	0.729849	-2.3703	0.0177736	0.0385389	slco1c1
ENSDARG00000016753	887.007	-1.7956	0.486243	-3.69281	0.000221787	0.000877661	ipo9
ENSDARG00000016789	511.332	-3.52205	0.694666	-5.07013	3.97539e-07	3.16209e-06	zgc:152891
ENSDARG00000016811	1507.01	-2.36887	0.473896	-4.9987	5.77168e-07	4.40927e-06	ints3
ENSDARG00000016825	190.316	-3.45245	1.32756	-2.6006	0.0093062	0.0221989	vtg6
ENSDARG00000016830	1651.56	-1.96773	0.480256	-4.09725	4.18084e-05	0.000203035	rimkla
ENSDARG00000016837	716.184	-2.86803	0.561831	-5.10479	3.3116e-07	2.67823e-06	glipr2l
ENSDARG00000016856	208.823	-1.95857	0.565688	-3.46228	0.000535624	0.00190079	pon2
ENSDARG00000016868	109.58	-6.50387	0.952532	-6.82798	8.61182e-12	1.75782e-10	rhobtb4
ENSDARG00000016886	55.3387	-2.38037	0.925545	-2.57186	0.0101154	0.0237868	dnajb9b
ENSDARG00000016903	1303.17	-1.31144	0.478829	-2.73884	0.00616569	0.0156096	wdr5
ENSDARG00000016908	9578.6	-9.76414	0.785439	-12.4314	1.76432e-35	5.59743e-33	zgc:171779
ENSDARG00000016977	156.779	-2.56597	0.774052	-3.31498	0.000916481	0.00303779	snx27b
ENSDARG00000016999	380.924	-5.18635	0.579187	-8.95453	3.41174e-19	2.05333e-17	lin28a
ENSDARG00000017010	142.204	-2.44719	0.702568	-3.4832	0.000495458	0.00177785	scamp2l
ENSDARG00000017037	886.545	-1.34698	0.504536	-2.66975	0.00759082	0.0186512	ikbkg
ENSDARG00000017049	827.682	-1.69604	0.581546	-2.91644	0.00354054	0.0097276	adsl
ENSDARG00000017093	701.814	-1.68149	0.535192	-3.14185	0.00167885	0.00511157	emc8
ENSDARG00000017163	1018.58	-3.04404	0.630183	-4.83042	1.36248e-06	9.51511e-06	sinup
ENSDARG00000017168	26.9505	-2.54873	1.05795	-2.40912	0.0159908	0.0352341	nr2f1b
ENSDARG00000017188	925.559	-6.65299	0.610234	-10.9024	1.12317e-27	1.73217e-25	si:ch211-223m11.2
ENSDARG00000017199	388.116	-2.65576	0.656893	-4.04291	5.27913e-05	0.000248862	elp2
ENSDARG00000017230	1159.13	-1.78588	0.475745	-3.75386	0.000174133	0.000708789	fbxw11b
ENSDARG00000017254	21.563	-4.09372	1.25354	-3.26573	0.00109182	0.00352518	kcnk1b
ENSDARG00000017272	489.918	-1.68237	0.558492	-3.01235	0.00259236	0.00742184	eapp
ENSDARG00000017294	290.25	-3.27445	0.550743	-5.94551	2.75591e-09	3.53164e-08	gnai2b
ENSDARG00000017315	971.245	-1.57878	0.597578	-2.64197	0.00824248	0.0200163	larp7
ENSDARG00000017316	295.973	-2.14382	0.547339	-3.9168	8.97318e-05	0.000396255	bag5
ENSDARG00000017320	837.329	-1.78351	0.522354	-3.41437	0.000639304	0.00221561	f11r.1
ENSDARG00000017365	96.8812	-1.96387	0.753177	-2.60744	0.00912209	0.0218184	slc23a2
ENSDARG00000017386	67.6579	-2.37947	0.741253	-3.21007	0.00132704	0.00416754	sobpb
ENSDARG00000017423	1289.71	-1.8188	0.476295	-3.81863	0.000134192	0.000563461	patl1
ENSDARG00000017431	255.158	-1.52313	0.538016	-2.83101	0.0046401	0.012253	mindy2
ENSDARG00000017500	922.345	-1.09125	0.467576	-2.33384	0.019604	0.0418421	rock2a
ENSDARG00000017595	452.777	-1.14155	0.504267	-2.26377	0.023588	0.0490903	ccdc6b
ENSDARG00000017605	435.459	-1.51625	0.501269	-3.02482	0.00248781	0.00717338	rpp40
ENSDARG00000017606	326.882	-2.23453	0.861565	-2.59358	0.00949838	0.0226064	sys1
ENSDARG00000017617	513.067	-1.98134	0.553719	-3.57823	0.000345925	0.00130125	alg6
ENSDARG00000017657	59.5884	-2.2481	0.754425	-2.97988	0.00288358	0.00814119	zgc:112163
ENSDARG00000017658	929.605	-1.93075	0.586746	-3.2906	0.000999744	0.00327391	gmppb
ENSDARG00000017675	1426.73	-2.03728	0.479902	-4.2452	2.18402e-05	0.000113829	utp4
ENSDARG00000017696	932.855	-2.46915	0.473377	-5.21602	1.82804e-07	1.57904e-06	utp25
ENSDARG00000017708	759.4	-1.7238	0.563931	-3.05675	0.0022375	0.00653734	lrrc40
ENSDARG00000017741	4673.15	-2.34652	0.45519	-5.15503	2.53584e-07	2.11953e-06	g3bp1
ENSDARG00000017781	845.342	-1.52386	0.523382	-2.91156	0.00359629	0.00984911	hsd17b10
ENSDARG00000017809	380.049	-2.3354	0.508499	-4.59274	4.37472e-06	2.7298e-05	stard3
ENSDARG00000017813	310.362	-2.12793	0.568178	-3.74519	0.000180257	0.000731303	pigs
ENSDARG00000017834	386.65	-2.86249	0.592614	-4.83028	1.3634e-06	9.51848e-06	micall2b
ENSDARG00000017835	243.471	-1.53043	0.606593	-2.52299	0.0116361	0.0267731	brf1a
ENSDARG00000017842	1129.64	-1.7061	0.466391	-3.65808	0.00025411	0.000988662	syvn1
ENSDARG00000017844	869.181	-1.0947	0.469682	-2.33072	0.0197683	0.0421521	copz1
ENSDARG00000017886	654.237	-1.27386	0.478251	-2.66358	0.00773146	0.0189473	zbtb11
ENSDARG00000017901	272.658	-3.28732	0.5478	-6.00096	1.96159e-09	2.59304e-08	tln2a
ENSDARG00000017905	497.655	-1.52682	0.542606	-2.81386	0.00489503	0.01283	casp3a
ENSDARG00000017917	125.343	-2.94754	0.704116	-4.18616	2.83715e-05	0.000144017	her7
ENSDARG00000017929	478.762	-1.59084	0.491075	-3.23951	0.00119735	0.00381831	ncoa2
ENSDARG00000017947	32.0673	-3.15123	1.21258	-2.59878	0.00935551	0.0222974	ptk6a
ENSDARG00000017960	213.458	-1.80406	0.628796	-2.86907	0.00411678	0.0110603	sfxn2
ENSDARG00000018000	48.3732	-3.34316	0.880512	-3.79683	0.000146557	0.000608247	ubp1
ENSDARG00000018049	2893.54	-1.52693	0.454623	-3.35867	0.000783182	0.00264491	sf3b2
ENSDARG00000018073	605.091	-2.21995	0.544211	-4.07922	4.51871e-05	0.000217493	mrps22
ENSDARG00000018077	322.059	-5.44002	0.744022	-7.31163	2.63915e-13	6.87914e-12	rbp1
ENSDARG00000018106	669.07	-2.24968	0.48552	-4.63356	3.59434e-06	2.28719e-05	eif2b3
ENSDARG00000018107	83.6039	-2.6986	0.829159	-3.25463	0.00113541	0.00364702	rab3da
ENSDARG00000018110	679.439	-1.71058	0.533317	-3.20743	0.00133925	0.00420086	pak4
ENSDARG00000018145	5718.1	-3.64271	0.515097	-7.07189	1.52842e-12	3.46712e-11	mid1ip1l
ENSDARG00000018162	34.1781	-3.66726	1.20931	-3.03251	0.00242528	0.00701272	ctnnal1
ENSDARG00000018190	1315.52	-1.22139	0.460542	-2.65208	0.00799974	0.0195109	asna1
ENSDARG00000018206	250.717	-2.03351	0.54026	-3.76395	0.00016725	0.000683023	nck2a
ENSDARG00000018296	277.304	-2.33478	0.539902	-4.32446	1.52905e-05	8.32487e-05	rev1
ENSDARG00000018303	223.584	-2.12492	0.735129	-2.89055	0.00384572	0.0104446	etv4
ENSDARG00000018325	405.083	-1.44503	0.528129	-2.73613	0.00621664	0.0157128	taf5
ENSDARG00000018382	265.192	-3.59396	0.612042	-5.87208	4.30372e-09	5.28049e-08	prkcha
ENSDARG00000018461	1580.16	-2.32206	0.469311	-4.94781	7.50549e-07	5.6068e-06	zgc:56095
ENSDARG00000018491	4290.63	-3.79309	0.47829	-7.93053	2.18211e-15	7.91834e-14	pdia4
ENSDARG00000018492	292.742	-3.69914	0.803378	-4.60448	4.13494e-06	2.59697e-05	znf503
ENSDARG00000018494	1081.64	-1.7611	0.487675	-3.61121	0.000304771	0.00116155	smn1
ENSDARG00000018508	176.614	-3.24953	0.639715	-5.07966	3.7812e-07	3.02061e-06	zdhhc8b
ENSDARG00000018542	187.327	-7.0805	1.10158	-6.42761	1.29627e-10	2.16773e-09	hapln4
ENSDARG00000018559	317.193	-1.6753	0.55777	-3.00356	0.0026684	0.00760913	kdm7ab
ENSDARG00000018574	983.574	-2.1356	0.502294	-4.25169	2.12163e-05	0.000110792	sf3b4
ENSDARG00000018627	594.167	-1.18454	0.495495	-2.39062	0.0168197	0.0367542	arl5a
ENSDARG00000018650	624.089	-2.10606	0.485111	-4.3414	1.41577e-05	7.78639e-05	gtpbp3
ENSDARG00000018698	891.954	-1.30479	0.570888	-2.28555	0.0222806	0.0467329	carm1
ENSDARG00000018788	42.8089	-8.61185	1.72696	-4.98672	6.14134e-07	4.6628e-06	st8sia2
ENSDARG00000018797	17.8182	-6.06247	1.76757	-3.42984	0.00060394	0.00210786	crygmxl1
ENSDARG00000018814	384.863	-1.71897	0.638735	-2.69121	0.00711944	0.017652	esrp2
ENSDARG00000018890	1291.12	-2.4214	0.46692	-5.18589	2.14987e-07	1.82439e-06	snrpa
ENSDARG00000018902	1169.13	-2.20131	0.492143	-4.47291	7.7162e-06	4.51426e-05	pes
ENSDARG00000018904	2512.23	-1.54817	0.453687	-3.41242	0.00064389	0.00223046	cstf3
ENSDARG00000018921	72.8912	-1.79649	0.773355	-2.32298	0.0201803	0.0428906	fam84a
ENSDARG00000018968	508.219	-2.38898	0.500704	-4.77125	1.8309e-06	1.2442e-05	acvr1ba
ENSDARG00000018976	655.895	-3.99582	0.545091	-7.33055	2.29212e-13	6.01694e-12	sptlc2a
ENSDARG00000018985	623.746	-1.5003	0.522086	-2.87367	0.00405734	0.0109285	castor2
ENSDARG00000019004	1024.06	-1.75568	0.499018	-3.51827	0.000434373	0.00158687	smarcd1
ENSDARG00000019137	1498.73	-2.8854	0.615696	-4.6864	2.7805e-06	1.81136e-05	tram1
ENSDARG00000019142	246.047	-2.23981	0.551876	-4.05855	4.93789e-05	0.00023497	fam185a
ENSDARG00000019156	743.998	-1.70053	0.697022	-2.43971	0.0146992	0.0327422	haus5
ENSDARG00000019195	1110.61	-2.79664	0.496536	-5.63229	1.77834e-08	1.89872e-07	vps9d1
ENSDARG00000019233	413.588	-2.33384	0.620786	-3.75949	0.000170258	0.000694033	nln
ENSDARG00000019278	56.3779	-2.35411	0.856087	-2.74985	0.00596226	0.0151731	GNB4
ENSDARG00000019300	321.753	-1.73934	0.577162	-3.0136	0.00258166	0.0073969	ints7
ENSDARG00000019311	644.431	-2.66053	0.641423	-4.14785	3.35611e-05	0.000166889	fbxo30b
ENSDARG00000019484	186.007	-1.6123	0.697749	-2.31072	0.0208485	0.0441124	zdhhc7
ENSDARG00000019498	246.015	-1.4881	0.552629	-2.69276	0.00708623	0.0175814	cry5
ENSDARG00000019507	2646.47	-1.75296	0.544605	-3.21878	0.00128739	0.00405652	mcm5
ENSDARG00000019530	645.82	-1.965	0.558412	-3.51891	0.000433331	0.00158384	hdgfl2
ENSDARG00000019556	269.409	-1.37495	0.558022	-2.46397	0.0137406	0.030892	clcn7
ENSDARG00000019581	1275.43	-1.2146	0.485435	-2.50209	0.0123462	0.0281667	uso1
ENSDARG00000019595	65.0959	-3.0523	0.776835	-3.92915	8.52462e-05	0.000378857	senp8
ENSDARG00000019596	1132.6	-1.26497	0.521044	-2.42777	0.0151919	0.0336892	nrd1a
ENSDARG00000019614	736.703	-2.02423	0.480386	-4.21376	2.5115e-05	0.000129364	jade3
ENSDARG00000019636	594.666	-2.07904	0.48501	-4.28659	1.81437e-05	9.66502e-05	yif1a
ENSDARG00000019644	5026.34	-1.47111	0.483287	-3.04396	0.00233485	0.00678518	ldhba
ENSDARG00000019706	3897.46	-8.60458	0.547502	-15.7161	1.17382e-55	2.60682e-52	zar1
ENSDARG00000019707	546.745	-2.52617	0.49194	-5.13511	2.81978e-07	2.32708e-06	spout1
ENSDARG00000019743	915.582	-2.28191	0.546961	-4.17198	3.01961e-05	0.000152062	dctn1a
ENSDARG00000019747	340.395	-6.62544	1.04462	-6.34244	2.26161e-10	3.63691e-09	hsd3b2
ENSDARG00000019763	2412.83	-6.58663	0.50144	-13.1354	2.06364e-39	9.75092e-37	acp5a
ENSDARG00000019774	550.713	-2.16013	0.498762	-4.33099	1.48442e-05	8.11572e-05	zhx3
ENSDARG00000019834	569.661	-1.70227	0.605583	-2.81097	0.00493928	0.0129262	edrf1
ENSDARG00000019838	260.205	-2.02897	0.571108	-3.55269	0.000381315	0.00141728	ugdh
ENSDARG00000019842	463.921	-2.43019	0.518122	-4.69038	2.72693e-06	1.77908e-05	cnot3b
ENSDARG00000019907	697.37	-3.18826	0.498616	-6.39422	1.6137e-10	2.66249e-09	dscc1
ENSDARG00000019998	836.758	-1.63456	0.492022	-3.32213	0.000893322	0.00297167	slc30a7
ENSDARG00000020077	667.602	-2.9456	0.496776	-5.92942	3.03998e-09	3.85342e-08	nol10
ENSDARG00000020079	866.598	-2.66393	0.525056	-5.0736	3.90354e-07	3.10939e-06	neil3
ENSDARG00000020080	197.723	-4.88449	0.74497	-6.55662	5.50399e-11	9.70871e-10	ek1
ENSDARG00000020085	158.918	-3.10054	0.755078	-4.10626	4.02121e-05	0.000195883	slc33a1
ENSDARG00000020123	800.659	-1.78348	0.511435	-3.48721	0.000488081	0.00175479	coq8a
ENSDARG00000020131	920.87	-3.67167	0.598298	-6.13685	8.41735e-10	1.20757e-08	fnbp1l
ENSDARG00000020178	91.9685	-1.57692	0.699183	-2.25538	0.0241095	0.0499369	nova1
ENSDARG00000020217	596.549	-1.54634	0.49924	-3.09739	0.00195232	0.00581116	cpsf4
ENSDARG00000020235	1028.23	-1.4929	0.550764	-2.71059	0.0067163	0.0168157	sept9a
ENSDARG00000020241	371.059	-2.12956	0.539909	-3.9443	8.00344e-05	0.000358059	icmt
ENSDARG00000020278	112.526	-3.66963	0.769639	-4.76798	1.8608e-06	1.26112e-05	si:dkeyp-120h9.1
ENSDARG00000020289	1386.06	-5.20969	0.525465	-9.91444	3.60253e-23	3.66995e-21	pif1
ENSDARG00000020292	61.9584	-2.82606	0.846554	-3.33831	0.000842886	0.00282122	si:ch211-254n4.3
ENSDARG00000020298	1895.19	-3.92227	0.513175	-7.64314	2.11986e-14	6.64005e-13	btg2
ENSDARG00000020301	1002.36	-1.91826	0.475953	-4.03036	5.56912e-05	0.00026109	os9
ENSDARG00000020334	405.684	-1.52734	0.537234	-2.84298	0.00446941	0.0118657	ptpn11a
ENSDARG00000020354	365.277	-3.87284	0.546404	-7.08786	1.36203e-12	3.11194e-11	lmx1a
ENSDARG00000020377	2146.13	-2.8558	0.477192	-5.98459	2.16938e-09	2.84065e-08	eif4g2a
ENSDARG00000020387	414.275	-2.08432	0.61957	-3.36414	0.000767829	0.00259661	nipsnap3a
ENSDARG00000020395	438.481	-1.34036	0.547418	-2.44851	0.014345	0.0320755	mical2b
ENSDARG00000020482	1334.17	-1.27825	0.465601	-2.74538	0.00604408	0.0153508	nono
ENSDARG00000020493	363.107	-1.31683	0.570125	-2.30972	0.0209035	0.044216	lgi1a
ENSDARG00000020494	553.07	-1.35779	0.54162	-2.50691	0.0121792	0.0278583	znf330
ENSDARG00000020527	1260.51	-1.33116	0.46678	-2.85179	0.00434735	0.0115888	nup62l
ENSDARG00000020595	935.445	-1.28988	0.519977	-2.48065	0.0131144	0.0296734	gnl3l
ENSDARG00000020621	653.516	-1.09333	0.47956	-2.27987	0.0226154	0.0473099	ap1b1
ENSDARG00000020642	184.839	-2.19132	0.632335	-3.46544	0.000529367	0.00188189	gtdc1
ENSDARG00000020656	61.8793	-4.52356	0.908726	-4.97792	6.42724e-07	4.86656e-06	prkg1a
ENSDARG00000020711	3025.27	-2.49163	0.722508	-3.44858	0.000563543	0.0019878	rrm2
ENSDARG00000020730	825.911	-1.86441	0.529308	-3.52236	0.000427726	0.00156722	smpd4
ENSDARG00000020749	2708.36	-6.89813	0.614434	-11.2268	3.01152e-29	5.52726e-27	caprin2
ENSDARG00000020764	966.51	-2.13622	0.473488	-4.51165	6.43239e-06	3.84469e-05	slmapb
ENSDARG00000020794	64.7445	-3.98888	0.915582	-4.35666	1.3206e-05	7.31918e-05	neurod6b
ENSDARG00000020798	309.041	-2.17406	0.539394	-4.03057	5.56415e-05	0.000260914	necap1
ENSDARG00000020820	953.687	-1.59964	0.580626	-2.75503	0.00586869	0.0149876	srp68
ENSDARG00000020857	190.702	-2.41938	0.618305	-3.91293	9.11822e-05	0.00040194	ccdc149b
ENSDARG00000020871	224.353	-2.76769	0.630786	-4.38768	1.14565e-05	6.45259e-05	ptprz1b
ENSDARG00000020913	811.302	-1.75818	0.493367	-3.56363	0.000365762	0.00136702	ddx56
ENSDARG00000020948	395.72	-2.62703	0.509152	-5.15961	2.47466e-07	2.07073e-06	gmcl1
ENSDARG00000020953	549.849	-1.70295	0.512055	-3.32573	0.000881888	0.00293716	dnajb6b
ENSDARG00000020960	236.752	-2.04535	0.548548	-3.72866	0.000192502	0.000775315	hgs
ENSDARG00000020976	211.447	-2.03484	0.676786	-3.00662	0.00264167	0.00754161	ubald1b
ENSDARG00000020979	1831.83	-3.94826	0.524511	-7.5275	5.17191e-14	1.54172e-12	ripor3
ENSDARG00000020981	210.347	-1.85307	0.583338	-3.17666	0.0014898	0.00461249	slc35a3b
ENSDARG00000020982	87.2454	-3.84438	0.742995	-5.17416	2.28936e-07	1.93389e-06	prickle2a
ENSDARG00000020986	590.268	-3.64778	0.535083	-6.81721	9.28239e-12	1.88776e-10	ctu1
ENSDARG00000021097	457.635	-1.55612	0.614713	-2.53146	0.0113589	0.0262414	nelfcd
ENSDARG00000021110	554.292	-1.33878	0.53594	-2.498	0.0124897	0.0284484	poc1b
ENSDARG00000021112	455.299	-1.62934	0.501385	-3.24968	0.00115536	0.00370559	c1d
ENSDARG00000021120	993.548	-1.10645	0.484719	-2.28266	0.0224505	0.0470286	ndc1
ENSDARG00000021141	411.978	-2.78715	0.662486	-4.20711	2.58656e-05	0.000132722	plekhf2
ENSDARG00000021220	506.581	-1.65598	0.565919	-2.92617	0.00343165	0.00946945	hmgcl
ENSDARG00000021225	620.554	-1.25532	0.48771	-2.5739	0.0100559	0.0236859	prkci
ENSDARG00000021288	472.39	-3.98065	0.644748	-6.17395	6.66037e-10	9.7504e-09	mier3b
ENSDARG00000021324	304.823	-3.18916	0.567244	-5.62219	1.88548e-08	2.00255e-07	nsun4
ENSDARG00000021372	502.333	-1.28298	0.508431	-2.5234	0.0116225	0.0267446	tob1b
ENSDARG00000021408	306.838	-1.50195	0.59267	-2.5342	0.0112704	0.0260586	kdelc2
ENSDARG00000021433	474.754	-1.58086	0.566966	-2.78828	0.00529891	0.0137539	asmtl
ENSDARG00000021455	201.47	-1.55574	0.548125	-2.83829	0.00453553	0.0120197	strbp
ENSDARG00000021509	619.953	-1.7226	0.490277	-3.51353	0.000442195	0.00161067	tab2
ENSDARG00000021521	270.93	-2.45824	0.763047	-3.22161	0.00127472	0.00402173	rgs14a
ENSDARG00000021556	955.536	-2.07903	0.519761	-3.99998	6.33488e-05	0.000291757	ubl3b
ENSDARG00000021569	437.474	-3.03602	0.567739	-5.34756	8.91473e-08	8.2491e-07	gdap2
ENSDARG00000021584	53.589	-4.42407	0.91793	-4.81962	1.43834e-06	9.99142e-06	cntn5
ENSDARG00000021589	268.708	-1.78814	0.630747	-2.83496	0.00458317	0.0121228	tmem60
ENSDARG00000021787	321.521	-3.10898	0.592453	-5.24763	1.54067e-07	1.35132e-06	abcb5
ENSDARG00000021794	2084.76	-1.90784	0.616868	-3.09278	0.00198291	0.00589116	hmmr
ENSDARG00000021812	1169.37	-1.23767	0.469077	-2.63851	0.00832705	0.0202062	cherp
ENSDARG00000021827	605.032	-2.85646	0.488395	-5.84867	4.95529e-09	5.99059e-08	katna1
ENSDARG00000021849	1847.34	-3.26828	0.553184	-5.90813	3.46015e-09	4.34141e-08	si:dkey-256h2.1
ENSDARG00000021859	1244.18	-2.6306	0.541884	-4.85454	1.20667e-06	8.53429e-06	erap1b
ENSDARG00000021895	66.5489	-2.83956	0.806442	-3.5211	0.000429767	0.00157263	disc1
ENSDARG00000021899	344.241	-2.40769	0.51428	-4.68168	2.84537e-06	1.84766e-05	b4galt7
ENSDARG00000021985	891.386	-1.84336	0.472145	-3.90424	9.45234e-05	0.000414939	ercc2
ENSDARG00000021996	83.7831	-3.08549	0.754809	-4.08778	4.35516e-05	0.000210641	ppp2r2aa
ENSDARG00000022020	521.699	-2.53072	0.504028	-5.02099	5.14047e-07	3.9763e-06	focad
ENSDARG00000022213	569.28	-1.4231	0.492312	-2.89065	0.00384451	0.0104426	uck2b
ENSDARG00000022232	1678.45	-2.24464	0.498047	-4.50687	6.57897e-06	3.91674e-05	ppan
ENSDARG00000022254	246.172	-1.36851	0.539381	-2.53718	0.0111749	0.0258754	prkcbb
ENSDARG00000022280	2272.51	-1.56392	0.509702	-3.06831	0.00215274	0.00632715	brd2a
ENSDARG00000022378	286.033	-2.26025	0.648518	-3.48525	0.000491677	0.00176628	mtmr1b
ENSDARG00000022399	541.489	-2.99041	0.508363	-5.88243	4.04276e-09	4.99619e-08	ntmt1
ENSDARG00000022410	1624.04	-1.51389	0.4596	-3.29393	0.000987971	0.00324185	rrp12
ENSDARG00000022466	768.124	-2.1271	0.479481	-4.43624	9.1543e-06	5.26136e-05	clcn5b
ENSDARG00000022599	1077.65	-1.39622	0.468001	-2.98336	0.00285102	0.00806259	dnpep
ENSDARG00000022690	509.006	-1.2747	0.546378	-2.333	0.0196481	0.041928	chic2
ENSDARG00000022718	295.909	-1.9616	0.728236	-2.69363	0.00706775	0.0175508	casp8ap2
ENSDARG00000022763	119.81	-3.75382	0.766405	-4.89796	9.68389e-07	7.02173e-06	hpcal1
ENSDARG00000022772	65.0948	-1.95612	0.807539	-2.42233	0.0154214	0.0341387	si:ch211-106a19.1
ENSDARG00000022918	802.636	-2.48364	0.480613	-5.16764	2.37066e-07	1.99347e-06	tbcc
ENSDARG00000022944	617.633	-3.70476	0.516408	-7.17409	7.27872e-13	1.75321e-11	ecd
ENSDARG00000022952	632.254	-1.47075	0.483114	-3.04431	0.00233215	0.00677823	zgc:66448
ENSDARG00000022978	341.651	-2.3709	0.894099	-2.65172	0.0080082	0.0195285	tmpob
ENSDARG00000023002	562.904	-2.69227	0.627413	-4.29106	1.77824e-05	9.4999e-05	dtl
ENSDARG00000023028	1386.19	-1.18261	0.501028	-2.36036	0.0182571	0.0394296	cdv3
ENSDARG00000023053	32.9049	-2.39084	1.03756	-2.30429	0.0212065	0.0447377	fam129ab
ENSDARG00000023058	335.117	-3.70288	0.547762	-6.76002	1.37975e-11	2.71163e-10	foxo3a
ENSDARG00000023117	374.719	-3.51614	0.663773	-5.2972	1.17591e-07	1.0577e-06	gopc
ENSDARG00000023152	459.155	-2.53104	0.566479	-4.46802	7.8947e-06	4.60656e-05	wdr73
ENSDARG00000023160	465.987	-1.45102	0.577001	-2.51477	0.011911	0.0273179	snrnp40
ENSDARG00000023190	1555.79	-1.45812	0.471875	-3.09006	0.00200114	0.00593421	kpna4
ENSDARG00000023214	117.019	-3.2125	0.655349	-4.90197	9.48818e-07	6.89056e-06	mob2a
ENSDARG00000023267	357.463	-2.66614	0.638789	-4.17374	2.99641e-05	0.000151031	atad1a
ENSDARG00000023299	1704.25	-1.71895	0.467218	-3.67913	0.000234033	0.000918755	snu13b
ENSDARG00000023309	540.362	-2.26231	0.504503	-4.48423	7.31792e-06	4.31307e-05	spryd4
ENSDARG00000023330	2899.89	-1.31319	0.454452	-2.8896	0.00385728	0.0104709	anp32b
ENSDARG00000023394	1247.85	-1.85549	0.559826	-3.31441	0.000918367	0.00304268	slc37a2
ENSDARG00000023472	3175.56	-1.59034	0.503982	-3.15554	0.00160201	0.00490724	ctnnb2
ENSDARG00000023479	6957.76	-4.73598	0.512851	-9.23462	2.59198e-20	1.87411e-18	lrp13
ENSDARG00000023526	23.9699	-5.72786	1.50827	-3.79763	0.000146088	0.000606757	ggt1a
ENSDARG00000023532	1021.05	-1.70027	0.682682	-2.49058	0.0127534	0.0289844	pinx1
ENSDARG00000023600	171.294	-4.78414	0.757077	-6.31923	2.62876e-10	4.16262e-09	sh3gl2a
ENSDARG00000023627	1145.01	-3.30122	0.570114	-5.79046	7.01927e-09	8.17859e-08	ggps1
ENSDARG00000023648	665.707	-1.21415	0.531477	-2.28448	0.0223435	0.0468427	idh3g
ENSDARG00000023768	609.184	-4.63069	0.518589	-8.92939	4.28346e-19	2.53672e-17	mfsd4aa
ENSDARG00000023878	894.722	-1.87534	0.51722	-3.62582	0.000288047	0.00110521	stk24b
ENSDARG00000023900	1076.97	-3.89495	0.610206	-6.38301	1.73644e-10	2.84178e-09	casd1
ENSDARG00000023933	20.9504	-3.03868	1.18665	-2.56073	0.0104453	0.024428	skila
ENSDARG00000023950	188.846	-2.39875	0.623057	-3.84997	0.000118134	0.000504135	znhit3
ENSDARG00000023999	793.364	-3.34599	0.513989	-6.50985	7.52238e-11	1.29885e-09	heatr5a
ENSDARG00000024116	214.779	-1.9662	0.708662	-2.77453	0.00552824	0.0142195	vamp8
ENSDARG00000024124	556.252	-3.22794	0.789667	-4.08772	4.35642e-05	0.000210641	sde2
ENSDARG00000024184	756.782	-1.94901	0.511269	-3.8121	0.000137791	0.00057661	narf
ENSDARG00000024195	257.845	-1.24213	0.537337	-2.31164	0.0207973	0.0440313	znf395b
ENSDARG00000024209	636.294	-1.66558	0.544045	-3.06147	0.00220252	0.00645212	wasf2
ENSDARG00000024219	202.799	-1.72922	0.694774	-2.48889	0.0128142	0.0291009	cdk5rap2
ENSDARG00000024277	188.299	-2.69246	0.576628	-4.66933	3.02189e-06	1.95485e-05	pigm
ENSDARG00000024314	1378.01	-2.83333	0.484532	-5.84756	4.98825e-09	6.02715e-08	herpud1
ENSDARG00000024317	438.453	-1.84842	0.621196	-2.97558	0.00292436	0.00823643	trap1
ENSDARG00000024416	504.645	-2.13242	0.555793	-3.83673	0.000124686	0.00052844	twistnb
ENSDARG00000024540	1049.87	-3.4066	0.501652	-6.79076	1.11547e-11	2.22774e-10	tspan36
ENSDARG00000024561	1692.28	-1.4669	0.474495	-3.0915	0.0019915	0.00591115	nolc1
ENSDARG00000024602	390.246	-2.44953	0.518616	-4.7232	2.32161e-06	1.53708e-05	zgc:162964
ENSDARG00000024654	236.473	-1.85702	0.569383	-3.26146	0.00110839	0.00356964	pgm3
ENSDARG00000024687	88.3224	-3.5997	0.786284	-4.57812	4.69171e-06	2.90557e-05	polr3g
ENSDARG00000024693	978.059	-1.90118	0.479052	-3.96863	7.22864e-05	0.00032782	lysmd3
ENSDARG00000024744	108.546	-2.01883	0.635104	-3.17874	0.00147915	0.00458273	dpp6b
ENSDARG00000024775	481.228	-2.24444	0.698013	-3.21547	0.0013023	0.00410001	si:ch211-129c21.1
ENSDARG00000024894	10.0564	-6.52151	2.30709	-2.82672	0.00470268	0.0123917	tbx5a
ENSDARG00000024904	622.172	-1.78875	0.773807	-2.31163	0.0207983	0.0440313	stil
ENSDARG00000024933	424.485	-1.44549	0.551581	-2.62063	0.00877685	0.021131	spast
ENSDARG00000024964	394.562	-3.02238	0.616457	-4.90282	9.44701e-07	6.86965e-06	patj
ENSDARG00000024967	616.174	-1.39637	0.489743	-2.85124	0.00435497	0.0116021	fancg
ENSDARG00000025033	942.803	-1.41276	0.479562	-2.94595	0.00321968	0.00896361	stx5a
ENSDARG00000025218	622.323	-1.57896	0.626101	-2.52189	0.0116726	0.0268377	myo5ab
ENSDARG00000025226	184.533	-1.58819	0.579892	-2.73877	0.006167	0.0156112	znf668
ENSDARG00000025233	321.306	-1.17797	0.517996	-2.2741	0.0229603	0.0479411	lipt1
ENSDARG00000025275	204.712	-7.4126	0.909115	-8.15364	3.53124e-16	1.43893e-14	gbgt1l1
ENSDARG00000025285	203.967	-1.41357	0.569531	-2.48199	0.0130652	0.0295862	panx1a
ENSDARG00000025332	663.908	-1.20446	0.506753	-2.37682	0.0174628	0.037995	rbm28
ENSDARG00000025346	648.207	-2.22842	0.500363	-4.45361	8.44376e-06	4.88968e-05	znf277
ENSDARG00000025386	2615.95	-5.36236	0.505043	-10.6176	2.46771e-26	3.30139e-24	lsm14b
ENSDARG00000025420	50.574	-3.14578	1.06015	-2.9673	0.00300424	0.00843467	fzd5
ENSDARG00000025467	524.703	-2.87374	0.537895	-5.34257	9.164e-08	8.46213e-07	aatf
ENSDARG00000025693	636.007	-1.59286	0.501041	-3.1791	0.00147731	0.00457893	tmem9b
ENSDARG00000025699	1178.24	-1.50529	0.473784	-3.17716	0.00148726	0.00460656	mbd1b
ENSDARG00000025766	215.178	-3.27573	0.726309	-4.5101	6.47975e-06	3.86522e-05	zgc:66440
ENSDARG00000025788	302.295	-2.3994	0.523758	-4.58112	4.62491e-06	2.86819e-05	chp2
ENSDARG00000025808	653.029	-3.21335	0.592236	-5.42579	5.76985e-08	5.53268e-07	taf5l
ENSDARG00000025820	785.895	-1.56151	0.502805	-3.10559	0.00189898	0.00566988	chek2
ENSDARG00000025854	578.859	-1.10793	0.485599	-2.28158	0.022514	0.0471378	ddx51
ENSDARG00000025859	836.205	-2.06499	0.565899	-3.64904	0.000263226	0.00102002	lmf2b
ENSDARG00000025904	385.182	-1.7724	0.608043	-2.91493	0.00355773	0.00976881	tecrb
ENSDARG00000025953	204.387	-3.84368	0.816306	-4.70862	2.49401e-06	1.63867e-05	rhoq
ENSDARG00000025974	21.6594	-4.7378	1.3656	-3.4694	0.000521632	0.00185826	magi3b
ENSDARG00000026028	37.1731	-3.2322	0.928707	-3.48033	0.000500798	0.00179441	ankrd44
ENSDARG00000026048	956.686	-2.01086	0.520291	-3.86486	0.000111151	0.000477178	tsc1a
ENSDARG00000026070	489.634	-1.64158	0.588414	-2.78984	0.00527335	0.0136971	cd82b
ENSDARG00000026072	814.694	-2.07863	0.477975	-4.34883	1.36863e-05	7.55521e-05	pdcd5
ENSDARG00000026109	425.97	-2.0855	0.503998	-4.13791	3.50483e-05	0.000173121	slc48a1b
ENSDARG00000026149	299.449	-3.64956	0.670838	-5.4403	5.31906e-08	5.1292e-07	slc46a1
ENSDARG00000026166	137.718	-2.62782	0.909718	-2.88861	0.00386948	0.0104963	emilin1b
ENSDARG00000026178	387.49	-1.67878	0.54015	-3.10799	0.00188367	0.00563172	ube3d
ENSDARG00000026185	532.328	-1.88688	0.515154	-3.66275	0.000249524	0.000972863	yju2
ENSDARG00000026448	292.344	-1.24603	0.525163	-2.37265	0.0176609	0.0383428	med29
ENSDARG00000026453	704.858	-1.99888	0.490024	-4.07915	4.52006e-05	0.000217511	zgc:66474
ENSDARG00000026484	253.213	-5.36408	0.680688	-7.88038	3.26381e-15	1.15418e-13	rab15
ENSDARG00000026540	746.099	-1.65294	0.51807	-3.19056	0.00141995	0.00442338	ppp4r2a
ENSDARG00000026630	349.563	-1.74819	0.591	-2.95802	0.0030962	0.00865783	mark3b
ENSDARG00000026654	770.354	-1.3705	0.521929	-2.62584	0.00864347	0.0208669	gosr1
ENSDARG00000026736	44.6415	-2.79856	0.973303	-2.87532	0.00403621	0.0108808	il11ra
ENSDARG00000026759	199.943	-1.46857	0.600558	-2.44534	0.0144715	0.0323355	ldlrb
ENSDARG00000026767	972.253	-2.2665	0.566123	-4.00355	6.23996e-05	0.000287922	nol11
ENSDARG00000026787	53.6629	-3.92477	1.17183	-3.34926	0.000810268	0.00272313	aqp7
ENSDARG00000026862	658.251	-1.71292	0.485422	-3.52873	0.000417558	0.00153478	aktip
ENSDARG00000026871	2737.6	-3.86954	0.516694	-7.48904	6.93783e-14	2.02731e-12	uchl1
ENSDARG00000026908	1485.59	-1.26242	0.495021	-2.55024	0.0107648	0.0250619	tmed2
ENSDARG00000026972	394.466	-5.55112	0.594287	-9.3408	9.56094e-21	7.22208e-19	si:ch211-119o8.6
ENSDARG00000027046	974.875	-1.42323	0.468248	-3.03947	0.00236997	0.00687284	scyl3
ENSDARG00000027140	963.738	-2.38624	0.706752	-3.37635	0.000734545	0.00250196	nup160
ENSDARG00000027159	46.8895	-2.00897	0.813836	-2.46852	0.0135674	0.0305583	fbxo28
ENSDARG00000027169	6510.5	-9.55358	0.818684	-11.6694	1.82643e-31	4.13891e-29	kpna7
ENSDARG00000027345	407.214	-1.98051	0.556048	-3.56176	0.00036837	0.00137538	mpzl2b
ENSDARG00000027353	1164.35	-1.83797	0.494355	-3.71791	0.000200877	0.000804239	zmym2
ENSDARG00000027491	848.069	-1.52431	0.600485	-2.53847	0.0111338	0.0257928	uros
ENSDARG00000027495	130.92	-4.48564	0.761826	-5.88801	3.90883e-09	4.84686e-08	elovl4b
ENSDARG00000027500	434.034	-1.80367	0.502631	-3.58845	0.000332644	0.00125593	oxsr1b
ENSDARG00000027552	113.42	-2.5143	0.7942	-3.16583	0.0015464	0.00475987	mapk1
ENSDARG00000027639	5722.21	-11.1475	0.704294	-15.828	1.99524e-56	5.03443e-53	zgc:165539
ENSDARG00000027689	2666.73	-2.61242	0.525268	-4.9735	6.57543e-07	4.97367e-06	pold1
ENSDARG00000027699	21.917	-3.30585	1.15006	-2.8745	0.00404664	0.010905	zgc:103510
ENSDARG00000027749	1790.63	-1.35456	0.536014	-2.5271	0.0115008	0.0265224	hirip3
ENSDARG00000027813	674.021	-1.23257	0.504665	-2.44235	0.014592	0.0325285	nus1
ENSDARG00000027966	400.32	-1.55066	0.620721	-2.49816	0.0124839	0.0284409	ap1s3b
ENSDARG00000027992	71.9649	-2.26598	0.826742	-2.74085	0.00612797	0.0155283	hao2
ENSDARG00000028053	198.928	-2.65201	0.586534	-4.52149	6.14055e-06	3.69164e-05	bmp1b
ENSDARG00000028088	209.824	-1.27199	0.559843	-2.27204	0.0230841	0.0481589	galk1
ENSDARG00000028131	280.298	-1.58144	0.578056	-2.7358	0.00622292	0.0157258	hccsa.1
ENSDARG00000028159	580.784	-1.99049	0.749531	-2.65565	0.00791549	0.0193343	tead1a
ENSDARG00000028201	368.256	-1.1876	0.51961	-2.28557	0.0222797	0.0467329	commd8
ENSDARG00000028228	231.982	-1.61356	0.552886	-2.91842	0.00351807	0.00967186	zbtb18
ENSDARG00000028259	358.661	-1.68913	0.538197	-3.1385	0.00169816	0.00515834	aldh3a2a
ENSDARG00000028295	2771.84	-2.14595	0.587098	-3.65519	0.000256993	0.000998828	mkrn4
ENSDARG00000028321	606.223	-2.22854	0.497636	-4.47826	7.52549e-06	4.4225e-05	synj2bp
ENSDARG00000028379	669.748	-1.88826	0.516767	-3.65398	0.000258202	0.00100265	trub2
ENSDARG00000028401	817.611	-1.54127	0.476815	-3.23243	0.00122742	0.00389685	rhogc
ENSDARG00000028431	740.429	-1.8022	0.570275	-3.16023	0.00157647	0.00483767	adnp2b
ENSDARG00000028688	924.676	-1.44354	0.486399	-2.96781	0.00299931	0.0084219	exosc2
ENSDARG00000028784	1028.9	-5.33371	0.720043	-7.40749	1.28716e-13	3.55097e-12	si:dkey-24p1.6
ENSDARG00000028800	20.6721	-3.21112	1.16988	-2.74481	0.00605452	0.015372	CYTH2
ENSDARG00000028815	2092.42	-5.16759	0.513311	-10.0672	7.7168e-24	8.31916e-22	zgc:162945
ENSDARG00000028848	700.196	-1.11837	0.493533	-2.26604	0.0234488	0.0488356	lsm12a
ENSDARG00000028850	462.381	-2.56971	0.595066	-4.31836	1.57193e-05	8.52279e-05	btr16
ENSDARG00000028894	809.684	-1.74349	0.547505	-3.18442	0.00145046	0.00450388	mrgbp
ENSDARG00000028937	315.305	-2.03538	0.559999	-3.63461	0.000278404	0.00107117	taf1b
ENSDARG00000028976	1219	-3.75436	0.495242	-7.58085	3.43305e-14	1.05305e-12	pus3
ENSDARG00000028982	421.881	-1.24482	0.524528	-2.37322	0.0176337	0.0382917	pcca
ENSDARG00000029003	1005.4	-2.50051	0.472844	-5.28824	1.23501e-07	1.10593e-06	eif1axa
ENSDARG00000029036	547.72	-2.34407	0.59944	-3.91044	9.21297e-05	0.000405634	rab32a
ENSDARG00000029045	196.988	-2.00731	0.629909	-3.18666	0.00143924	0.00447469	peli2
ENSDARG00000029058	1963.16	-1.46893	0.563659	-2.60606	0.00915893	0.0218947	rbbp4
ENSDARG00000029071	584.362	-1.94691	0.52325	-3.7208	0.000198593	0.000796812	creld2
ENSDARG00000029133	616.076	-1.59883	0.494757	-3.23154	0.00123126	0.00390569	tubgcp3
ENSDARG00000029252	705.702	-1.82911	0.477054	-3.83417	0.00012599	0.000533358	ssb
ENSDARG00000029291	534.074	-2.88436	0.49551	-5.821	5.84974e-09	6.95455e-08	ipmkb
ENSDARG00000029305	372.758	-3.34242	0.538059	-6.21201	5.23124e-10	7.80225e-09	baiap2l1a
ENSDARG00000029307	299.167	-3.12412	0.660475	-4.73012	2.24392e-06	1.49135e-05	rmc1
ENSDARG00000029356	166.496	-1.74582	0.568666	-3.07002	0.00214045	0.00629522	mboat1
ENSDARG00000029406	744.602	-2.53247	0.609069	-4.15794	3.21134e-05	0.000160516	h2afx
ENSDARG00000029432	459.213	-7.73861	0.840912	-9.20263	3.49282e-20	2.42402e-18	tph1a
ENSDARG00000029439	460.876	-3.22347	0.537336	-5.99899	1.98552e-09	2.6231e-08	atp2a2a
ENSDARG00000029445	2448.3	-2.5923	0.460628	-5.62775	1.8258e-08	1.94565e-07	zgc:56676
ENSDARG00000029511	153.521	-6.90371	0.986692	-6.99682	2.61833e-12	5.74584e-11	kcns3b
ENSDARG00000029569	381.346	-3.71567	0.551372	-6.73895	1.59535e-11	3.10242e-10	snapc1a
ENSDARG00000029600	534.516	-1.99356	0.489866	-4.06961	4.70911e-05	0.000225436	wdr32
ENSDARG00000029639	568.472	-2.70567	0.741464	-3.6491	0.000263161	0.00101994	tomm70a
ENSDARG00000029688	73.5147	-2.46942	0.752339	-3.28232	0.00102956	0.00334962	hsp70.1
ENSDARG00000029692	204.872	-1.69912	0.623068	-2.72702	0.00639095	0.0161156	rufy3
ENSDARG00000029695	427.203	-2.60504	0.516544	-5.04322	4.57772e-07	3.59103e-06	pgp
ENSDARG00000029724	589.631	-1.34942	0.510469	-2.64349	0.00820562	0.0199355	pqbp1
ENSDARG00000029729	361.228	-2.25632	0.566774	-3.981	6.86273e-05	0.000313402	clybl
ENSDARG00000029761	66.6826	-4.28787	0.904959	-4.73819	2.15637e-06	1.43983e-05	mpp6b
ENSDARG00000029768	1219.85	-1.36552	0.544132	-2.50954	0.0120888	0.0276687	waplb
ENSDARG00000029881	22.032	-2.54511	1.09164	-2.33145	0.0197294	0.0420733	kcnh2a
ENSDARG00000029931	1088.78	-1.85395	0.476216	-3.89309	9.8976e-05	0.000431499	atp13a1
ENSDARG00000030020	361.909	-1.40976	0.544898	-2.58719	0.00967611	0.0229678	agfg1a
ENSDARG00000030064	517.432	-1.22626	0.487942	-2.51313	0.0119667	0.0274258	plekha1a
ENSDARG00000030092	925.477	-2.65026	0.57349	-4.62128	3.81376e-06	2.41712e-05	tram2
ENSDARG00000030106	204.427	-1.83487	0.596604	-3.07552	0.00210133	0.0061908	stmn4
ENSDARG00000030133	350.83	-1.77271	0.539773	-3.28417	0.00102282	0.00333304	fkbp6
ENSDARG00000030155	411.649	-1.71278	0.531051	-3.22527	0.00125853	0.00397519	ssbp3b
ENSDARG00000030237	1180.5	-1.1176	0.482364	-2.31691	0.0205084	0.0435047	pgrmc2
ENSDARG00000030241	935.932	-1.28548	0.470559	-2.73182	0.00629851	0.015906	vbp1
ENSDARG00000030250	783.365	-3.7685	0.622414	-6.05465	1.40722e-09	1.92318e-08	dennd2db
ENSDARG00000030251	52.4683	-2.82758	0.803991	-3.51693	0.000436563	0.00159363	klhl36
ENSDARG00000030335	297.186	-1.9475	0.55023	-3.53943	0.000400987	0.00147975	zc3h10
ENSDARG00000030357	657.339	-2.40833	0.629085	-3.82831	0.000129027	0.000544656	zgc:66313
ENSDARG00000030368	1966.53	-2.15849	0.457824	-4.71467	2.42097e-06	1.59304e-05	naa15b
ENSDARG00000030465	417.447	-1.91007	0.527697	-3.61964	0.000295015	0.00112916	tmem263
ENSDARG00000030532	715.044	-1.28263	0.523444	-2.45037	0.0142711	0.0319328	arhgef12a
ENSDARG00000030591	601.331	-2.01834	0.50195	-4.021	5.79525e-05	0.000270607	lrrc42
ENSDARG00000030630	389.846	-3.88259	0.753448	-5.1531	2.5622e-07	2.13915e-06	mfsd2aa
ENSDARG00000030633	171.896	-1.9167	0.631906	-3.0332	0.00241978	0.00699903	plekhm3
ENSDARG00000030636	286.941	-2.40972	0.617956	-3.89951	9.63893e-05	0.000421463	tex30
ENSDARG00000030641	85.627	-3.32693	0.884787	-3.76014	0.000169817	0.000692488	letmd1
ENSDARG00000030665	533.952	-2.25438	0.695029	-3.24358	0.00118038	0.00377617	CU929230.1
ENSDARG00000030753	504.824	-1.48918	0.537641	-2.76984	0.00560843	0.0144041	prrg4
ENSDARG00000030756	6164.44	-3.33953	0.460658	-7.24947	4.18411e-13	1.0464e-11	dnmt1
ENSDARG00000030805	479.275	-2.44618	0.514369	-4.7557	1.97758e-06	1.33489e-05	znhit2
ENSDARG00000030830	542.846	-1.20168	0.490344	-2.45069	0.0142584	0.0319139	cmtr1
ENSDARG00000030881	232.13	-1.48842	0.553411	-2.68953	0.00715517	0.0177287	baxb
ENSDARG00000030905	166.304	-2.95717	0.739341	-3.99973	6.34144e-05	0.000291998	cited2
ENSDARG00000030913	1435.13	-2.3891	0.520502	-4.58999	4.4327e-06	2.7621e-05	cluha
ENSDARG00000030945	758.881	-1.51614	0.482044	-3.14524	0.00165952	0.00506384	si:ch211-259g3.4
ENSDARG00000030949	748.684	-2.19325	0.499048	-4.39486	1.10844e-05	6.25731e-05	srprb
ENSDARG00000030957	631.662	-2.09933	0.554449	-3.78634	0.000152886	0.000631445	yipf4
ENSDARG00000030964	478.901	-2.55418	0.565594	-4.51593	6.30396e-06	3.77267e-05	pde12
ENSDARG00000030972	210.389	-1.80288	0.588012	-3.06606	0.00216897	0.00636676	dnaja1
ENSDARG00000031044	1136.55	-4.9313	0.501238	-9.83824	7.70471e-23	7.63867e-21	lipg
ENSDARG00000031098	769.453	-1.75264	0.47601	-3.68195	0.000231457	0.000910574	timm50
ENSDARG00000031119	486.563	-4.34719	0.582214	-7.46665	8.22614e-14	2.37001e-12	baiap2l1b
ENSDARG00000031150	162.433	-3.84334	0.639155	-6.01317	1.81932e-09	2.42227e-08	gba3
ENSDARG00000031202	539.108	-2.37561	0.562427	-4.22386	2.40153e-05	0.000124146	alg11
ENSDARG00000031214	971.791	-1.31832	0.467581	-2.81945	0.00481055	0.0126384	arcn1b
ENSDARG00000031243	88.6378	-4.95039	0.852799	-5.80487	6.44154e-09	7.58503e-08	snai3
ENSDARG00000031325	414.929	-2.3951	0.714609	-3.35162	0.000803396	0.00270413	tmed1a
ENSDARG00000031346	638.66	-1.54071	0.53226	-2.89465	0.0037958	0.010328	rbm17
ENSDARG00000031434	797.963	-2.52152	0.496549	-5.07808	3.8127e-07	3.04249e-06	rcor1
ENSDARG00000031533	349.505	-2.68808	0.55163	-4.87298	1.09929e-06	7.86661e-06	ap5m1
ENSDARG00000031664	140.984	-4.81128	0.82611	-5.82402	5.74494e-09	6.83728e-08	sox21a
ENSDARG00000031681	272.713	-1.4244	0.52621	-2.7069	0.00679156	0.0169659	atp6v0b
ENSDARG00000031761	3652.33	-2.4992	0.490925	-5.09079	3.56566e-07	2.85974e-06	dab2
ENSDARG00000031770	673.896	-1.35668	0.545427	-2.48738	0.0128689	0.0292072	kat7b
ENSDARG00000031814	336.886	-2.00067	0.546621	-3.66008	0.000252141	0.000981514	dhrs13b
ENSDARG00000031885	9.39903	-6.42568	2.39014	-2.68841	0.00717929	0.0177845	psmb12
ENSDARG00000031894	148.426	-1.8132	0.620359	-2.92283	0.00346866	0.00955731	lef1
ENSDARG00000031915	594.772	-1.22044	0.519106	-2.35105	0.0187204	0.0402462	hif1an
ENSDARG00000031929	565.437	-2.06823	0.589215	-3.51014	0.000447867	0.00162919	stard14
ENSDARG00000031956	388.964	-1.41187	0.521391	-2.70789	0.00677121	0.0169246	tmem63a
ENSDARG00000031971	348.392	-2.03897	0.593393	-3.43613	0.000590098	0.00206571	kdelc1
ENSDARG00000031985	477.715	-1.4189	0.511222	-2.77552	0.00551139	0.0141795	ptpa
ENSDARG00000032155	187.206	-1.67017	0.615069	-2.71541	0.00661931	0.0166047	ppm1aa
ENSDARG00000032156	3598.19	-10.7589	0.831694	-12.9361	2.81402e-38	1.17913e-35	zgc:171776
ENSDARG00000032264	492.277	-1.94675	0.567407	-3.43095	0.000601461	0.00210152	mybl2b
ENSDARG00000032277	337.608	-1.86077	0.670206	-2.77642	0.0054961	0.014145	rars2
ENSDARG00000032285	160.318	-3.25435	0.73751	-4.41262	1.02129e-05	5.81558e-05	zgc:113294
ENSDARG00000032324	671.275	-1.84376	0.553214	-3.33281	0.000859739	0.00287071	epb41l5
ENSDARG00000032353	645.543	-2.01298	0.520557	-3.86697	0.000110195	0.000473624	tiprl
ENSDARG00000032369	166.003	-2.28958	0.617656	-3.70688	0.000209825	0.000836138	btbd6b
ENSDARG00000032373	923.692	-1.98171	0.489458	-4.04879	5.1484e-05	0.000243526	rnf145b
ENSDARG00000032426	150.426	-2.93439	0.635142	-4.62006	3.83636e-06	2.43006e-05	COQ8A (1 of many)
ENSDARG00000032601	173.082	-1.43319	0.577354	-2.48235	0.013052	0.0295594	macrod2
ENSDARG00000032704	410.054	-2.2176	0.508813	-4.35837	1.31033e-05	7.27131e-05	qrsl1
ENSDARG00000032708	120.601	-1.60482	0.709508	-2.26188	0.0237048	0.0492641	arl4cb
ENSDARG00000032859	274.143	-2.5651	0.590479	-4.34411	1.39844e-05	7.70443e-05	fam84b
ENSDARG00000032876	383.112	-2.25414	0.657302	-3.42938	0.00060496	0.00211042	trit1
ENSDARG00000032951	47.9923	-2.86367	0.968029	-2.95824	0.00309398	0.00865378	nrbp2a
ENSDARG00000032985	332.431	-2.09379	0.516656	-4.05257	5.06573e-05	0.000240179	mrpl27
ENSDARG00000032990	33.3319	-3.01504	1.03781	-2.90519	0.00367028	0.0100307	plxnb3
ENSDARG00000032997	758.665	-1.14705	0.505386	-2.26966	0.0232285	0.0484329	rnf185
ENSDARG00000033126	656.091	-2.22718	0.532586	-4.18181	2.89192e-05	0.000146362	prkrip1
ENSDARG00000033171	270.323	-2.15031	0.540365	-3.97938	6.90961e-05	0.000315349	trappc6bl
ENSDARG00000033231	2800.68	-5.55771	0.49552	-11.2159	3.40627e-29	6.15011e-27	mcm6l
ENSDARG00000033259	181.591	-1.89668	0.647748	-2.92812	0.00341021	0.00942082	dis3l2
ENSDARG00000033285	805.444	-2.49624	0.722804	-3.45355	0.000553253	0.00195429	gsto2
ENSDARG00000033320	121.585	-1.9165	0.678462	-2.82478	0.00473135	0.0124613	sar1ab
ENSDARG00000033361	275.218	-1.76532	0.556635	-3.17142	0.00151698	0.00468425	asl
ENSDARG00000033376	581.107	-1.99315	0.502686	-3.965	7.33961e-05	0.000332446	chchd4a
ENSDARG00000033437	333.017	-1.6917	0.52344	-3.23188	0.00122977	0.00390274	rps6ka1
ENSDARG00000033447	60.504	-3.16484	0.838027	-3.77654	0.000159021	0.000653264	nxph1
ENSDARG00000033451	321.981	-2.74838	0.535443	-5.13292	2.85286e-07	2.35176e-06	fam173b
ENSDARG00000033489	279.806	-2.05838	0.536325	-3.83793	0.000124075	0.000526354	ube2j1
ENSDARG00000033516	47.4661	-3.50936	0.916929	-3.82729	0.000129559	0.000546384	efr3ba
ENSDARG00000033539	622.41	-1.54074	0.514729	-2.99331	0.00275971	0.00783631	paics
ENSDARG00000033567	62.3644	-2.72684	0.816201	-3.34089	0.00083509	0.00279808	fkbp1ab
ENSDARG00000033662	110.461	-3.19804	0.869006	-3.68011	0.000233129	0.000916017	scd
ENSDARG00000033666	241.767	-2.24532	0.612282	-3.66714	0.000245274	0.000958313	pi4k2a
ENSDARG00000033707	755.435	-1.49899	0.482639	-3.10582	0.0018975	0.00566852	jade1
ENSDARG00000033768	781.858	-1.27117	0.486559	-2.61256	0.00898657	0.0215429	trappc13
ENSDARG00000033771	261.134	-1.88563	0.56915	-3.31306	0.000922796	0.00305553	hspbap1
ENSDARG00000033804	157.434	-2.11488	0.59241	-3.56996	0.000357032	0.00133777	snx27a
ENSDARG00000033852	911.794	-1.74998	0.517142	-3.38394	0.000714526	0.00244576	mad1l1
ENSDARG00000033861	727.101	-3.48556	0.563454	-6.18606	6.16853e-10	9.09029e-09	sepsecs
ENSDARG00000033889	1279.74	-1.80925	0.464477	-3.89523	9.81038e-05	0.000428033	spty2d1
ENSDARG00000033901	150.391	-2.05153	0.730124	-2.80984	0.00495668	0.0129702	msi2a
ENSDARG00000033949	112.736	-1.68259	0.735596	-2.28739	0.0221733	0.0465563	fbxo16
ENSDARG00000033965	1121.89	-1.75573	0.495514	-3.54325	0.000395222	0.0014609	nup58
ENSDARG00000033967	238.903	-1.58628	0.537459	-2.95144	0.00316293	0.00882552	trmt2b
ENSDARG00000033973	371.805	-1.2749	0.511004	-2.4949	0.0125994	0.0286718	mrps23
ENSDARG00000034013	444.304	-2.42242	0.507772	-4.77068	1.83605e-06	1.24732e-05	rgmd
ENSDARG00000034060	972.804	-1.40163	0.476464	-2.94173	0.00326388	0.00907527	elac2
ENSDARG00000034080	815.857	-2.32682	0.516326	-4.5065	6.59054e-06	3.92078e-05	plcd1b
ENSDARG00000034117	170.379	-1.92326	0.570388	-3.37185	0.000746658	0.00253389	rarga
ENSDARG00000034138	117.753	-3.44701	0.759846	-4.53646	5.72062e-06	3.46829e-05	shisa2a
ENSDARG00000034207	350.124	-6.87312	0.706299	-9.73118	2.22008e-22	1.99609e-20	cx44.2
ENSDARG00000034256	167.361	-2.04931	0.704575	-2.90857	0.00363085	0.00993518	cdk10
ENSDARG00000034326	941.612	-1.22635	0.488391	-2.51099	0.0120392	0.0275663	ing3
ENSDARG00000034396	1017.75	-1.53201	0.492005	-3.11381	0.00184689	0.00554491	mars
ENSDARG00000034409	814.27	-2.3791	0.568376	-4.18579	2.84181e-05	0.000144221	pik3r3b
ENSDARG00000034453	95.9239	-2.98984	0.729101	-4.10072	4.11864e-05	0.00020019	unc119a
ENSDARG00000034497	1141.73	-1.53566	0.475758	-3.22783	0.00124735	0.00394604	fbxl14a
ENSDARG00000034518	325.393	-1.5578	0.530592	-2.93596	0.00332513	0.0092225	trdmt1
ENSDARG00000034600	591.365	-1.24469	0.483204	-2.5759	0.00999785	0.0235703	tmem165
ENSDARG00000034685	523.746	-2.67079	0.502823	-5.31159	1.08672e-07	9.85e-07	tmem198b
ENSDARG00000034734	632.748	-1.26881	0.533984	-2.37612	0.0174958	0.0380592	med6
ENSDARG00000034823	1169.32	-1.73214	0.466272	-3.71488	0.000203304	0.000812777	copg2
ENSDARG00000034871	112.962	-2.18372	0.950063	-2.2985	0.0215333	0.0453454	mid2
ENSDARG00000034885	230.281	-2.46206	0.657338	-3.74551	0.00018003	0.000730514	bet1
ENSDARG00000034893	984.914	-3.87007	0.501603	-7.7154	1.206e-14	3.89285e-13	rarab
ENSDARG00000034956	758.725	-1.80965	0.634105	-2.85386	0.00431909	0.0115217	myclb
ENSDARG00000034989	9493.95	-10.9323	0.759323	-14.3974	5.37087e-47	4.79138e-44	retsatl
ENSDARG00000035009	177.254	-4.7284	0.813173	-5.81476	6.07222e-09	7.18061e-08	trim35-27
ENSDARG00000035018	1916.44	-6.05385	0.959629	-6.30853	2.81692e-10	4.4242e-09	thy1
ENSDARG00000035028	725.566	-3.11988	0.51366	-6.07381	1.24909e-09	1.72618e-08	lpcat4
ENSDARG00000035074	329.876	-2.23299	0.54241	-4.11679	3.84188e-05	0.000188138	rtel1
ENSDARG00000035095	393.494	-3.83506	0.606188	-6.32651	2.50766e-10	4.00073e-09	tdgf1
ENSDARG00000035120	1332.36	-2.66049	0.487466	-5.45779	4.82087e-08	4.70602e-07	gldc
ENSDARG00000035131	138.186	-2.81721	0.6176	-4.56155	5.07771e-06	3.11852e-05	surf4l
ENSDARG00000035149	255.043	-1.42676	0.548048	-2.60334	0.00923194	0.0220431	pex12
ENSDARG00000035167	423.862	-1.89453	0.505452	-3.74819	0.000178116	0.000723408	mrpl48
ENSDARG00000035171	2107.5	-8.65737	0.718689	-12.0461	2.03425e-33	5.44296e-31	btg4
ENSDARG00000035391	211.946	-2.06803	0.623604	-3.31626	0.000912296	0.00302709	ptcd2
ENSDARG00000035427	17.8562	-3.80423	1.31279	-2.89781	0.00375779	0.0102396	surf6
ENSDARG00000035468	86.5406	-2.83614	0.76808	-3.69251	0.000222054	0.000878563	slc25a25b
ENSDARG00000035470	529.118	-2.25682	0.596985	-3.78036	0.0001566	0.000644989	sh3glb2b
ENSDARG00000035471	69.9934	-2.05899	0.843517	-2.44096	0.0146481	0.0326449	si:dkey-220k22.1
ENSDARG00000035507	658.266	-2.78269	0.501019	-5.55407	2.79097e-08	2.86159e-07	ddx31
ENSDARG00000035515	547.569	-2.31466	0.575807	-4.01985	5.82341e-05	0.000271865	tm2d2
ENSDARG00000035532	34.2891	-2.36874	1.02266	-2.31626	0.020544	0.0435552	zgc:110329
ENSDARG00000035535	585.624	-1.92459	0.504738	-3.81304	0.00013727	0.000574754	rasa1a
ENSDARG00000035549	565.757	-2.12354	0.577572	-3.67667	0.000236299	0.000927162	uprt
ENSDARG00000035556	743.446	-1.601	0.552219	-2.89921	0.003741	0.0101964	rps6ka3a
ENSDARG00000035558	1063.56	-1.68312	0.589143	-2.8569	0.00427801	0.01143	gps2
ENSDARG00000035565	718.505	-1.12002	0.482859	-2.31956	0.0203649	0.0432458	atp6v0a2b
ENSDARG00000035570	612.321	-2.77068	0.498836	-5.55429	2.78749e-08	2.85934e-07	zgc:101016
ENSDARG00000035571	419.221	-2.82374	0.539217	-5.23675	1.63429e-07	1.42554e-06	abhd17b
ENSDARG00000035595	437.223	-2.60267	0.791723	-3.28735	0.00101133	0.00330387	ficd
ENSDARG00000035618	125.173	-1.74756	0.606074	-2.88341	0.003934	0.0106492	coq5
ENSDARG00000035622	2885.63	-1.63152	0.535721	-3.04547	0.0023232	0.00675487	xbp1
ENSDARG00000035631	407.978	-1.98413	0.507544	-3.90928	9.25725e-05	0.000407422	sdf2l1
ENSDARG00000035650	725.556	-2.32475	0.538078	-4.32048	1.55692e-05	8.45382e-05	evla
ENSDARG00000035663	51.8515	-2.05447	0.89976	-2.28335	0.0224099	0.0469597	zgc:103438
ENSDARG00000035665	28.905	-3.12914	1.11184	-2.81438	0.00488719	0.012814	si:dkey-267n13.1
ENSDARG00000035680	1050.4	-9.92507	0.97804	-10.1479	3.38526e-24	3.759e-22	zgc:113424
ENSDARG00000035697	270.837	-1.45696	0.551264	-2.64295	0.00821884	0.0199632	spinb
ENSDARG00000035719	346.666	-1.28834	0.555597	-2.31884	0.0204036	0.0433197	arl5c
ENSDARG00000035732	49.188	-3.06901	1.06723	-2.87566	0.00403183	0.0108717	arntl1b
ENSDARG00000035771	1453.69	-1.80347	0.537398	-3.35593	0.00079098	0.00266759	MEPCE
ENSDARG00000035821	1823.43	-1.14275	0.498657	-2.29166	0.0219254	0.0460922	si:ch211-173p18.3
ENSDARG00000035823	1306.96	-2.80358	0.468378	-5.98571	2.15444e-09	2.82521e-08	zmym4
ENSDARG00000035868	360.432	-2.08859	0.554178	-3.7688	0.000164035	0.00067212	spire1a
ENSDARG00000035870	372.05	-2.0308	0.510762	-3.97603	7.00767e-05	0.000319168	laptm4b
ENSDARG00000035872	502.065	-2.24894	0.520656	-4.31943	1.56431e-05	8.48772e-05	hsd17b12b
ENSDARG00000035873	276.159	-4.55451	0.685173	-6.64724	2.98648e-11	5.52698e-10	fjx1
ENSDARG00000035905	342.32	-1.92351	0.566966	-3.39263	0.000692241	0.00238087	slc25a44b
ENSDARG00000035909	760.719	-3.82727	0.509546	-7.51115	5.86096e-14	1.73085e-12	mfsd2ab
ENSDARG00000035910	456.71	-2.24491	0.519117	-4.32447	1.52897e-05	8.32487e-05	znf281b
ENSDARG00000035918	196.114	-1.309	0.562137	-2.32861	0.0198798	0.0423655	bzw2
ENSDARG00000035924	988.587	-1.12314	0.475888	-2.3601	0.0182702	0.0394502	dync1li2
ENSDARG00000035954	631.054	-3.1712	0.631899	-5.01852	5.20722e-07	4.02513e-06	tdp2b
ENSDARG00000035957	5458.12	-3.76461	0.455772	-8.25984	1.45865e-16	6.32689e-15	gmnn
ENSDARG00000035978	738.913	-1.20045	0.4768	-2.51772	0.0118116	0.0271235	ube3c
ENSDARG00000035985	283.12	-1.56105	0.590539	-2.64344	0.00820691	0.0199364	fam210aa
ENSDARG00000035987	630.934	-1.63567	0.521867	-3.13426	0.00172289	0.00522205	psmg2
ENSDARG00000036008	23.2983	-3.87467	1.34636	-2.87789	0.00400346	0.0108096	caly
ENSDARG00000036038	290.578	-2.02394	0.583662	-3.46766	0.000525003	0.00186817	harbi1
ENSDARG00000036043	157.555	-1.60691	0.609341	-2.63713	0.00836111	0.0202733	znf408
ENSDARG00000036055	411.491	-2.27221	0.543305	-4.1822	2.88698e-05	0.000146145	thap11
ENSDARG00000036056	362.025	-1.27427	0.547374	-2.32797	0.0199135	0.0424169	vrk3
ENSDARG00000036057	385.669	-2.1241	0.514431	-4.12902	3.64306e-05	0.000179311	tradd
ENSDARG00000036060	1132.5	-2.44604	0.524436	-4.66414	3.09918e-06	1.99961e-05	exosc6
ENSDARG00000036064	620.779	-2.07834	0.497706	-4.17585	2.96878e-05	0.000149876	cnep1r1
ENSDARG00000036070	65.0092	-2.74094	0.944362	-2.90243	0.0037028	0.0101047	znrd1
ENSDARG00000036076	1095.27	-2.19403	0.492009	-4.45934	8.2214e-06	4.78371e-05	heatr3
ENSDARG00000036090	221.513	-1.90871	0.541418	-3.5254	0.000422847	0.00155139	pard6gb
ENSDARG00000036136	848.349	-1.70005	0.658415	-2.58204	0.00982189	0.0232342	tipin
ENSDARG00000036144	962.189	-1.66706	0.49843	-3.34462	0.000823961	0.00276413	tssc4
ENSDARG00000036155	166.882	-2.13338	0.653268	-3.2657	0.00109194	0.00352518	gla
ENSDARG00000036158	573.936	-2.90262	0.515287	-5.63301	1.77089e-08	1.8935e-07	nudcd1
ENSDARG00000036164	391.382	-1.18725	0.501815	-2.36592	0.0179855	0.0389301	cars
ENSDARG00000036180	4382.21	-4.43874	0.565982	-7.84254	4.41534e-15	1.52024e-13	ccnb2
ENSDARG00000036235	161.025	-2.17058	0.694046	-3.12744	0.00176337	0.00532489	zbtb3
ENSDARG00000036247	882.106	-4.95025	0.551748	-8.97194	2.91341e-19	1.79227e-17	tmem144b
ENSDARG00000036281	91.1273	-2.93051	1.04694	-2.79911	0.00512445	0.013351	CC2D1A
ENSDARG00000036293	78.4971	-3.30914	0.811414	-4.07824	4.53781e-05	0.000218129	gnb1l
ENSDARG00000036386	383.067	-1.41857	0.603142	-2.35197	0.0186743	0.0401976	rbm4.1
ENSDARG00000036442	174.528	-2.5633	0.601144	-4.26403	2.00769e-05	0.000105731	atp11c
ENSDARG00000036482	1576.39	-1.20118	0.488972	-2.45655	0.014028	0.0314617	hexim1
ENSDARG00000036493	507.783	-2.13338	0.491569	-4.33994	1.42521e-05	7.83208e-05	si:ch73-174h16.4
ENSDARG00000036494	303.126	-2.11124	0.563525	-3.74648	0.000179334	0.00072809	gstcd
ENSDARG00000036500	797.455	-2.09393	0.559811	-3.74043	0.000183705	0.000744066	fam122b
ENSDARG00000036510	1593.25	-1.08142	0.476749	-2.26833	0.0233091	0.0485873	ccnt2b
ENSDARG00000036567	36.3172	-2.16072	0.881795	-2.45037	0.0142711	0.0319328	aanat1
ENSDARG00000036569	34.9732	-3.44793	0.988482	-3.48811	0.000486454	0.00174972	bach2a
ENSDARG00000036592	2405.65	-3.67462	0.466326	-7.87993	3.27559e-15	1.15651e-13	setd4
ENSDARG00000036675	4264.61	-1.6183	0.59762	-2.7079	0.00677098	0.0169246	hnrnpa1b
ENSDARG00000036687	928.435	-2.42279	0.478075	-5.06781	4.02429e-07	3.19526e-06	bcl9
ENSDARG00000036704	377.143	-1.80258	0.548236	-3.28797	0.00100914	0.00329815	tmem18
ENSDARG00000036755	406.749	-3.12494	0.536007	-5.83004	5.54153e-09	6.61647e-08	prmt9
ENSDARG00000036772	701.729	-2.11809	0.483558	-4.38022	1.1856e-05	6.65568e-05	pygo2
ENSDARG00000036811	616.889	-1.7274	0.501642	-3.44348	0.000574274	0.00201987	ifrd2
ENSDARG00000036844	187.146	-1.70239	0.563451	-3.02136	0.00251642	0.00724364	tsen54
ENSDARG00000036852	31.7631	-2.39192	1.02076	-2.34327	0.0191154	0.0409565	DXO
ENSDARG00000036894	123.116	-2.37311	0.798272	-2.97281	0.00295088	0.00829849	zgc:101853
ENSDARG00000036897	174.774	-6.06766	0.829634	-7.31366	2.59962e-13	6.78406e-12	sgms2b
ENSDARG00000036956	1359.78	-2.12335	0.49428	-4.29585	1.74022e-05	9.31698e-05	asxl1
ENSDARG00000036990	346.693	-2.44582	0.523969	-4.66786	3.04348e-06	1.96653e-05	dctd
ENSDARG00000036994	458.087	-3.24957	0.510564	-6.36467	1.95711e-10	3.17252e-09	tbc1d16
ENSDARG00000037002	654.517	-4.31029	0.607662	-7.09324	1.31012e-12	3.0057e-11	zgc:152968
ENSDARG00000037017	1778.12	-1.27719	0.47381	-2.69557	0.00702677	0.0174749	ube4b
ENSDARG00000037018	407.748	-1.44806	0.563791	-2.56843	0.0102161	0.0239799	gab1
ENSDARG00000037064	206.617	-1.55653	0.545148	-2.85525	0.00430027	0.011477	galca
ENSDARG00000037091	475.528	-2.42227	0.574187	-4.21862	2.45806e-05	0.000126832	asah1a
ENSDARG00000037099	193.249	-1.94068	0.625764	-3.1013	0.00192673	0.00574734	irs2a
ENSDARG00000037101	248.9	-3.16835	0.556816	-5.69013	1.26942e-08	1.39699e-07	mtmr7a
ENSDARG00000037109	1329.63	-2.53054	0.514593	-4.91756	8.76294e-07	6.42057e-06	pwp2h
ENSDARG00000037122	119.925	-2.25461	0.649949	-3.46891	0.000522576	0.00186043	TENM2
ENSDARG00000037140	467.496	-2.12091	0.743956	-2.85086	0.00436018	0.0116132	pfkfb1
ENSDARG00000037153	245.487	-1.41802	0.570469	-2.48571	0.0129294	0.0293235	atp6ap1b
ENSDARG00000037154	247.686	-2.20154	0.760808	-2.89368	0.0038075	0.0103548	hivep3b
ENSDARG00000037158	2649.85	-3.76605	0.482779	-7.80078	6.15259e-15	2.06784e-13	rcc1
ENSDARG00000037172	144.662	-2.35546	0.604924	-3.8938	9.86843e-05	0.000430481	ddrgk1
ENSDARG00000037177	1158.05	-1.73012	0.467669	-3.69946	0.000216057	0.000857801	zc3h13
ENSDARG00000037238	1124.94	-1.57295	0.489871	-3.21094	0.00132303	0.00415704	smad5
ENSDARG00000037245	328.555	-3.5803	0.598146	-5.98567	2.15503e-09	2.82521e-08	trmo
ENSDARG00000037283	634.408	-1.96456	0.624333	-3.14665	0.00165151	0.00504286	plrg1
ENSDARG00000037309	148.977	-2.02016	0.605827	-3.33455	0.000854374	0.00285524	gatb
ENSDARG00000037320	32.1289	-2.40399	0.952618	-2.52356	0.0116173	0.0267383	fam131c
ENSDARG00000037362	126.345	-1.75754	0.729236	-2.41012	0.0159474	0.0351488	scube2
ENSDARG00000037378	316.106	-1.22225	0.531935	-2.29775	0.0215763	0.0454185	qdprb1
ENSDARG00000037393	738.712	-3.09288	0.496698	-6.22689	4.75777e-10	7.17803e-09	slc43a1a
ENSDARG00000037432	716.291	-1.54927	0.571348	-2.7116	0.0066959	0.0167779	haus7
ENSDARG00000037433	748.429	-1.45506	0.583575	-2.49335	0.0126545	0.0287882	fmr1
ENSDARG00000037476	471.661	-1.92212	0.783233	-2.45408	0.0141245	0.0316525	sorbs3
ENSDARG00000037484	549.628	-2.37926	0.570411	-4.17114	3.03084e-05	0.00015249	tmem192
ENSDARG00000037491	1076.66	-6.36913	0.547839	-11.6259	3.04354e-31	6.56223e-29	bmp15
ENSDARG00000037506	368.276	-1.71464	0.528472	-3.24452	0.00117648	0.00376474	prps1b
ENSDARG00000037507	30.1254	-2.41784	0.963995	-2.50815	0.0121365	0.0277635	kctd12b
ENSDARG00000037514	482.469	-1.12153	0.488468	-2.29602	0.0216749	0.0456038	hdac3
ENSDARG00000037532	3101.47	-6.91511	0.613528	-11.2711	1.82343e-29	3.37455e-27	mcm3l
ENSDARG00000037545	94.9943	-6.75144	1.07469	-6.28224	3.3373e-10	5.18286e-09	mtnr1aa
ENSDARG00000037556	810.092	-3.12036	0.682078	-4.57478	4.76714e-06	2.94591e-05	st3gal5
ENSDARG00000037570	385.555	-2.14635	0.535272	-4.00983	6.07628e-05	0.000281599	polr1d
ENSDARG00000037640	2625.67	-2.05209	0.458695	-4.47375	7.68586e-06	4.50126e-05	aurkb
ENSDARG00000037654	170.504	-1.86177	0.587496	-3.169	0.00152967	0.00471818	pmm2
ENSDARG00000037706	195.716	-3.6863	0.592731	-6.21918	4.99754e-10	7.48889e-09	gss
ENSDARG00000037708	1120.9	-2.2247	0.558631	-3.98242	6.82162e-05	0.000311781	exosc10
ENSDARG00000037739	2150.68	-3.12339	0.50668	-6.16443	7.07366e-10	1.02674e-08	zgc:112980
ENSDARG00000037760	138.13	-3.74824	0.661583	-5.66556	1.46541e-08	1.59139e-07	uncx4.1
ENSDARG00000037773	484.226	-2.05959	0.509249	-4.04437	5.24639e-05	0.000247434	rybpa
ENSDARG00000037852	663.857	-3.20198	0.782989	-4.08943	4.32428e-05	0.000209452	zgc:101663
ENSDARG00000037871	806.893	-2.23525	0.4795	-4.66164	3.13704e-06	2.02169e-05	wipi2
ENSDARG00000037909	531.122	-1.6533	0.506715	-3.26279	0.00110323	0.00355491	timm29
ENSDARG00000037930	320.581	-1.44926	0.520772	-2.78291	0.00538731	0.013923	rnf113a
ENSDARG00000037935	480.888	-1.55751	0.495306	-3.14455	0.00166344	0.00507369	aldh16a1
ENSDARG00000037943	100.391	-4.54626	0.869549	-5.2283	1.71075e-07	1.48698e-06	cpt1cb
ENSDARG00000037965	1702.08	-1.34607	0.469854	-2.86486	0.00417188	0.0111936	srrm2
ENSDARG00000037966	472.753	-2.26654	0.528626	-4.28761	1.80605e-05	9.62923e-05	thoc6
ENSDARG00000037967	984.324	-1.81355	0.537637	-3.37318	0.000743042	0.00252316	si:dkey-16l2.16
ENSDARG00000037995	2829.77	-5.34491	0.524591	-10.1887	2.22698e-24	2.53624e-22	gdf3
ENSDARG00000038000	339.245	-2.59254	0.526742	-4.92185	8.5729e-07	6.29379e-06	crls1
ENSDARG00000038005	478.096	-1.91486	0.523953	-3.65463	0.000257551	0.00100053	med25
ENSDARG00000038012	235.511	-1.63873	0.545076	-3.00642	0.00264346	0.00754576	fam83fa
ENSDARG00000038027	852.312	-2.32924	0.546775	-4.25996	2.04466e-05	0.000107576	nol12
ENSDARG00000038066	4328.52	-2.44596	0.565577	-4.32471	1.52733e-05	8.31958e-05	kpna2
ENSDARG00000038067	178.908	-1.39452	0.566001	-2.46382	0.0137465	0.0309022	smurf2
ENSDARG00000038069	113.084	-4.65313	0.798706	-5.82584	5.68268e-09	6.77044e-08	mgat3a
ENSDARG00000038072	86.3027	-3.22967	0.779667	-4.14236	3.43744e-05	0.000170323	ptx4
ENSDARG00000038205	117.402	-3.0572	0.654307	-4.67242	2.97667e-06	1.92785e-05	her2
ENSDARG00000038213	680.752	-1.84102	0.551309	-3.33935	0.000839733	0.00281194	slc35b1
ENSDARG00000038222	339.377	-2.69987	0.559318	-4.82709	1.38545e-06	9.65426e-06	tyw3
ENSDARG00000038239	990.498	-1.16428	0.482399	-2.41351	0.0157995	0.0348644	tnpo2
ENSDARG00000038271	210.124	-2.82698	0.793865	-3.56104	0.000369389	0.00137872	zgc:113293
ENSDARG00000038290	1168.05	-1.68311	0.468457	-3.59287	0.000327055	0.00123608	thoc5
ENSDARG00000038293	63.9077	-3.34495	1.26906	-2.63577	0.00839472	0.0203397	zgc:103559
ENSDARG00000038300	537.321	-1.31203	0.539552	-2.43171	0.0150278	0.0333905	rnf34a
ENSDARG00000038305	31.2976	-5.21606	1.34934	-3.86565	0.000110795	0.000475832	vgll3
ENSDARG00000038306	747.191	-1.42871	0.543195	-2.63019	0.00853365	0.0206399	tsc22d1
ENSDARG00000038308	512.713	-2.71385	0.531862	-5.10254	3.35133e-07	2.70839e-06	ykt6
ENSDARG00000038309	138.23	-3.2356	0.623683	-5.18789	2.12691e-07	1.80698e-06	dnajc15
ENSDARG00000038312	914.96	-1.97582	0.546383	-3.61618	0.000298979	0.00114245	rcl1
ENSDARG00000038360	338.652	-2.2913	0.52513	-4.36331	1.28108e-05	7.13754e-05	thg1l
ENSDARG00000038363	36.5463	-2.85073	0.952186	-2.99388	0.00275452	0.00782355	drd4a
ENSDARG00000038397	505.262	-2.27347	0.56049	-4.05622	4.98742e-05	0.000237175	rpap2
ENSDARG00000038414	195.097	-2.67883	0.566772	-4.72647	2.28454e-06	1.51565e-05	b3galt6
ENSDARG00000038422	683.262	-2.64009	0.656107	-4.02388	5.72482e-05	0.000267769	entpd4
ENSDARG00000038429	156.841	-2.80035	0.916984	-3.05387	0.00225912	0.00658838	csrnp1b
ENSDARG00000038442	1083.74	-1.49578	0.465614	-3.21249	0.00131588	0.00413633	plcg1
ENSDARG00000038476	411.221	-2.50425	0.591795	-4.23161	2.32021e-05	0.00012025	si:dkeyp-68b7.7
ENSDARG00000038543	437.987	-2.10788	0.648014	-3.25283	0.00114263	0.00366857	wdr48b
ENSDARG00000038556	490.565	-2.58462	0.592729	-4.36054	1.29744e-05	7.21422e-05	zgc:112185
ENSDARG00000038563	611.124	-1.57064	0.49733	-3.15814	0.00158778	0.00486699	pitrm1
ENSDARG00000038566	450.3	-1.65316	0.582547	-2.8378	0.00454249	0.0120338	gnptg
ENSDARG00000038615	210.67	-1.786	0.683402	-2.6134	0.00896467	0.0214951	pip4p1a
ENSDARG00000038639	370.899	-5.40145	0.784409	-6.88601	5.73774e-12	1.20098e-10	elovl6l
ENSDARG00000038672	20.2413	-3.2269	1.30419	-2.47426	0.0133511	0.0301384	tcf7
ENSDARG00000038686	229.227	-1.79112	0.597697	-2.9967	0.0027292	0.00776256	si:ch211-134m17.9
ENSDARG00000038694	944.445	-1.15954	0.495401	-2.34061	0.0192522	0.041206	zgc:101744
ENSDARG00000038700	331.909	-3.31781	0.564975	-5.8725	4.29284e-09	5.27006e-08	gpr160
ENSDARG00000038720	5940.36	-9.57887	0.617953	-15.501	3.41693e-54	5.83717e-51	si:ch211-14a17.7
ENSDARG00000038754	1376.48	-2.18345	0.692966	-3.15087	0.00162785	0.00497679	plk3
ENSDARG00000038768	1234.51	-1.36418	0.495496	-2.75316	0.0059023	0.0150543	mrpl12
ENSDARG00000038785	1669.15	-1.20366	0.487741	-2.46782	0.0135938	0.0306115	abcf2a
ENSDARG00000038787	707.084	-2.21035	0.517757	-4.26908	1.96279e-05	0.000103686	tmub1
ENSDARG00000038789	342.729	-2.5823	0.517774	-4.98732	6.12231e-07	4.65032e-06	tmem53
ENSDARG00000038847	778.453	-1.08574	0.47271	-2.29685	0.0216274	0.0455175	gins3
ENSDARG00000038866	229.898	-2.03381	0.547	-3.71811	0.00020072	0.000803961	trappc8
ENSDARG00000038869	38.4268	-4.07922	1.03394	-3.9453	7.96995e-05	0.000356704	htr5aa
ENSDARG00000038870	682.177	-1.62312	0.50388	-3.22125	0.00127633	0.00402566	slu7
ENSDARG00000038882	3485.94	-2.10171	0.484754	-4.33562	1.45348e-05	7.96423e-05	smc4
ENSDARG00000038898	220.697	-2.42805	0.683968	-3.54994	0.000385314	0.00142832	zgc:113691
ENSDARG00000038900	3627.17	-1.90207	0.524034	-3.62967	0.000283786	0.00109055	acadm
ENSDARG00000038901	609.582	-1.69387	0.517457	-3.27344	0.00106245	0.0034425	tmem256
ENSDARG00000038910	654.505	-1.38664	0.514462	-2.69532	0.00703211	0.0174823	pccb
ENSDARG00000038954	376.41	-1.87879	0.579531	-3.24191	0.0011873	0.00379388	ctnnbip1
ENSDARG00000038964	151.246	-1.5019	0.64086	-2.34358	0.0190999	0.0409391	traf4b
ENSDARG00000038976	666.535	-2.07722	0.597979	-3.47374	0.000513258	0.00183258	pdcd7
ENSDARG00000038985	245.068	-2.21038	0.640824	-3.44928	0.000562076	0.00198325	cdyl
ENSDARG00000038991	359.482	-1.45804	0.511108	-2.8527	0.00433494	0.0115609	nsfb
ENSDARG00000039007	10358.4	-1.53266	0.612381	-2.50278	0.0123221	0.0281243	eno3
ENSDARG00000039020	2105.71	-2.86872	0.47279	-6.06764	1.29802e-09	1.78713e-08	fbxo5
ENSDARG00000039123	191.395	-3.1753	0.592815	-5.35632	8.49353e-08	7.8912e-07	trim9
ENSDARG00000039130	443.914	-1.71386	0.501636	-3.41655	0.000634209	0.00219967	cdkn3
ENSDARG00000039181	22.7987	-2.87077	1.09703	-2.61685	0.00887445	0.0213271	trpm3
ENSDARG00000039208	10102	-3.56741	0.451224	-7.90607	2.65641e-15	9.5459e-14	nasp
ENSDARG00000039213	684.382	-1.21826	0.479012	-2.54328	0.0109816	0.0254827	prpf38a
ENSDARG00000039217	937.277	-3.32823	0.60697	-5.48335	4.17349e-08	4.12116e-07	orc1
ENSDARG00000039240	29.7603	-3.99155	1.16423	-3.42847	0.000606984	0.00211615	cacng5b
ENSDARG00000039279	1127.43	-1.56882	0.536659	-2.9233	0.00346341	0.00954522	golga5
ENSDARG00000039299	285.42	-2.46064	0.541687	-4.54255	5.55774e-06	3.37599e-05	rdh14a
ENSDARG00000039335	256.838	-3.31085	0.551621	-6.00204	1.94854e-09	2.58039e-08	st6gal2a
ENSDARG00000039340	658.165	-1.27929	0.483694	-2.64484	0.00817297	0.0198656	tmem209
ENSDARG00000039345	1061.08	-1.78598	0.467203	-3.82271	0.000131992	0.000555376	drg1
ENSDARG00000039356	43.8774	-2.77915	0.864676	-3.2141	0.00130856	0.00411738	zgc:194209
ENSDARG00000039373	16.1328	-3.33695	1.34504	-2.48093	0.0131042	0.0296533	epha3
ENSDARG00000039374	410.347	-1.80823	0.50579	-3.57506	0.000350152	0.00131488	apool
ENSDARG00000039424	1058.55	-1.79083	0.508226	-3.52368	0.000425596	0.00155993	snrpb2
ENSDARG00000039436	230.018	-4.23423	0.734657	-5.76355	8.23633e-09	9.46262e-08	il13ra2
ENSDARG00000039453	17.4785	-5.54558	2.15438	-2.5741	0.0100501	0.0236759	dhrs7ca
ENSDARG00000039459	435.585	-2.50379	0.599308	-4.1778	2.94339e-05	0.000148696	qsox1
ENSDARG00000039490	1247.46	-1.44291	0.541436	-2.66496	0.00769975	0.0188779	pitpnaa
ENSDARG00000039521	1206.54	-1.67397	0.684861	-2.44424	0.0145157	0.0324018	ssx2ipa
ENSDARG00000039543	367.454	-2.22016	0.529672	-4.19158	2.77021e-05	0.000140909	mrps6
ENSDARG00000039613	670.539	-2.00286	0.493188	-4.06104	4.88541e-05	0.000232623	poll
ENSDARG00000039650	929.443	-2.44524	0.542157	-4.51021	6.47645e-06	3.86429e-05	itm2cb
ENSDARG00000039729	444.802	-2.26243	0.505257	-4.47778	7.5423e-06	4.4312e-05	asap1b
ENSDARG00000039754	592.674	-1.33996	0.539495	-2.48374	0.0130011	0.0294652	xpc
ENSDARG00000039757	991.536	-3.1397	0.477766	-6.57163	4.97689e-11	8.84921e-10	mcfd2
ENSDARG00000039828	9627.38	-6.94213	0.570524	-12.168	4.60295e-34	1.34503e-31	zp3b
ENSDARG00000039878	549.078	-1.44679	0.484369	-2.98695	0.00281778	0.00797977	ambra1b
ENSDARG00000039887	1491.4	-1.75676	0.514023	-3.41766	0.000631629	0.00219347	c1qbp
ENSDARG00000039892	353.485	-1.3047	0.538797	-2.4215	0.0154566	0.0342028	gnpnat1
ENSDARG00000039913	870.247	-1.21117	0.471174	-2.57053	0.0101542	0.0238654	tmem147
ENSDARG00000039915	516.507	-2.266	0.815697	-2.77799	0.00546958	0.0140964	bola1
ENSDARG00000039934	199.971	-2.56808	0.652379	-3.93649	8.2682e-05	0.000368937	hlcs
ENSDARG00000039958	694.206	-1.93243	0.487904	-3.96067	7.47387e-05	0.000337907	utp11l
ENSDARG00000039979	67.3923	-6.44697	1.21096	-5.32384	1.01601e-07	9.24735e-07	tecrl2b
ENSDARG00000039980	637.555	-1.19889	0.496427	-2.41504	0.0157335	0.0347365	ppt1
ENSDARG00000039997	795.019	-2.65042	0.57601	-4.60134	4.19773e-06	2.63119e-05	ptp4a3
ENSDARG00000040005	45.7298	-2.28068	0.836839	-2.72535	0.00642333	0.0161853	scfd2
ENSDARG00000040008	56.0577	-4.40267	0.952168	-4.62383	3.76711e-06	2.3896e-05	neurod6a
ENSDARG00000040009	1381.75	-2.73949	0.557296	-4.91569	8.84717e-07	6.47161e-06	palld
ENSDARG00000040024	159.912	-2.74905	0.667308	-4.1196	3.79524e-05	0.0001861	gpd1l
ENSDARG00000040033	543.332	-2.01897	0.487436	-4.14202	3.44267e-05	0.000170544	trmt11
ENSDARG00000040036	161.048	-3.87571	0.638427	-6.07072	1.27337e-09	1.75537e-08	tcf19l
ENSDARG00000040039	603.614	-2.07825	0.643385	-3.23018	0.00123712	0.00392038	pttg1ipb
ENSDARG00000040070	664.317	-1.36286	0.505375	-2.69673	0.0070025	0.0174301	coil
ENSDARG00000040072	1772.47	-1.13634	0.4692	-2.42187	0.015441	0.0341786	scpep1
ENSDARG00000040081	1088.7	-5.71777	0.582367	-9.81815	9.40498e-23	9.08112e-21	zp3d.1
ENSDARG00000040131	248.978	-1.68536	0.55694	-3.0261	0.00247731	0.00714682	zfyve26
ENSDARG00000040156	52.2358	-3.41681	0.877725	-3.8928	9.90939e-05	0.000431844	grm4
ENSDARG00000040179	211.075	-3.6759	0.591682	-6.21263	5.2105e-10	7.77653e-09	zgc:101562
ENSDARG00000040180	205.186	-2.77155	0.689533	-4.01946	5.83311e-05	0.000272261	slc35a1
ENSDARG00000040186	110.763	-1.51907	0.641582	-2.36769	0.0178997	0.0387745	fam210ab
ENSDARG00000040224	885.841	-2.18453	0.50784	-4.30162	1.69557e-05	9.11307e-05	krcp
ENSDARG00000040245	3380.35	-2.37806	0.488793	-4.86516	1.14365e-06	8.13269e-06	kpnb3
ENSDARG00000040249	188.152	-2.34295	0.655381	-3.57494	0.000350314	0.00131526	tlr18
ENSDARG00000040257	275.779	-3.58534	0.576259	-6.22174	4.91672e-10	7.37275e-09	slc38a11
ENSDARG00000040266	403.967	-1.97904	0.549506	-3.6015	0.000316388	0.00119965	sox19b
ENSDARG00000040277	770.789	-4.62414	0.646376	-7.15395	8.43165e-13	2.00482e-11	fbxo32
ENSDARG00000040280	634.192	-1.59939	0.673793	-2.37372	0.0176099	0.0382626	zgc:110182
ENSDARG00000040290	398.928	-2.18532	0.764747	-2.85757	0.00426892	0.0114084	pon3.2
ENSDARG00000040300	288.472	-1.73763	0.562419	-3.08956	0.00200454	0.00594191	gtpbp10
ENSDARG00000040303	658.62	-1.95181	0.515454	-3.78658	0.000152733	0.000630934	nbn
ENSDARG00000040334	402.818	-2.21555	0.675465	-3.28004	0.00103793	0.00337437	mat2aa
ENSDARG00000040338	223.779	-2.4134	0.554212	-4.35465	1.33278e-05	7.38114e-05	hvcn1
ENSDARG00000040350	512.622	-2.4946	0.53759	-4.64035	3.47828e-06	2.22098e-05	rpp38
ENSDARG00000040407	206.224	-2.36791	0.597009	-3.96629	7.29996e-05	0.000330785	usp22
ENSDARG00000040452	359.228	-1.78859	0.528532	-3.38407	0.000714206	0.00244569	fam214a
ENSDARG00000040453	185.261	-2.14365	0.584996	-3.66438	0.000247939	0.000967362	wdfy2
ENSDARG00000040455	241.306	-1.53474	0.579263	-2.64947	0.00806173	0.019631	unc50
ENSDARG00000040463	398.874	-1.67453	0.507907	-3.29693	0.000977481	0.0032117	slc25a51b
ENSDARG00000040490	9.84868	-4.47482	1.89796	-2.3577	0.0183888	0.0396685	dusp19a
ENSDARG00000040492	1307.65	-2.22608	0.504443	-4.41295	1.01972e-05	5.80961e-05	mthfd1b
ENSDARG00000040505	321.323	-2.0222	0.518312	-3.9015	9.55966e-05	0.000418492	yif1b
ENSDARG00000040510	2102.62	-11.4767	0.995835	-11.5247	9.90072e-31	2.03036e-28	ca15b
ENSDARG00000040534	729.502	-4.72143	0.656893	-7.18752	6.59796e-13	1.59964e-11	epcam
ENSDARG00000040538	546.15	-1.57746	0.576254	-2.73744	0.00619192	0.0156635	spsb4b
ENSDARG00000040555	416.552	-1.75975	0.49984	-3.52063	0.000430515	0.00157499	bckdha
ENSDARG00000040557	514.172	-1.79171	0.565584	-3.1679	0.00153543	0.00473136	exosc5
ENSDARG00000040584	400.231	-2.0951	0.580066	-3.61183	0.000304043	0.00115943	eef1akmt1
ENSDARG00000040614	1047.93	-2.17013	0.478938	-4.53114	5.86676e-06	3.55011e-05	sestd1
ENSDARG00000040635	233.569	-3.84947	0.578946	-6.6491	2.94896e-11	5.46339e-10	rnf11b
ENSDARG00000040649	98.9042	-3.2704	0.8322	-3.92983	8.50065e-05	0.000377943	prickle1a
ENSDARG00000040650	1634.02	-1.23505	0.481298	-2.56607	0.0102857	0.0241133	gps1
ENSDARG00000040666	1502.08	-2.14728	0.554725	-3.8709	0.000108436	0.000466777	nifk
ENSDARG00000040695	219.913	-2.7396	0.672743	-4.07229	4.65538e-05	0.000223249	fkbp14
ENSDARG00000040707	185.465	-2.44418	0.669775	-3.64925	0.000263009	0.00101953	chchd4b
ENSDARG00000040717	452.203	-3.11798	0.627831	-4.96627	6.82538e-07	5.14172e-06	macc1
ENSDARG00000040730	1494.71	-2.40955	0.464298	-5.18967	2.10667e-07	1.79252e-06	wdr75
ENSDARG00000040803	543.206	-2.45973	0.506572	-4.85563	1.20003e-06	8.49548e-06	lactb
ENSDARG00000040861	701.923	-1.94668	0.507728	-3.83411	0.000126022	0.000533388	tcf25
ENSDARG00000040890	668.24	-1.59657	0.509036	-3.13646	0.00171002	0.00518942	fdps
ENSDARG00000040910	361.457	-1.65085	0.589835	-2.79883	0.00512881	0.0133592	ildr1b
ENSDARG00000040966	324.195	-1.44114	0.512681	-2.81099	0.00493892	0.0129262	zgc:113149
ENSDARG00000040982	78.5885	-2.82713	0.940789	-3.00506	0.00265525	0.00757552	fgf14
ENSDARG00000040984	205.341	-2.9471	0.745456	-3.95342	7.70422e-05	0.000346684	hspa13
ENSDARG00000040990	1895.55	-1.9745	0.487006	-4.05437	5.02688e-05	0.000238643	usp37
ENSDARG00000041011	647.982	-2.44828	0.489954	-4.99696	5.82401e-07	4.44466e-06	gemin7
ENSDARG00000041022	1085	-1.21819	0.482338	-2.5256	0.0115502	0.0266142	pdcd4b
ENSDARG00000041040	287.861	-2.05207	0.559817	-3.66561	0.000246752	0.00096324	piga
ENSDARG00000041072	638.755	-1.66913	0.520128	-3.20907	0.00133163	0.00417873	mier1a
ENSDARG00000041081	1366	-1.86405	0.485951	-3.83588	0.000125116	0.000530161	kmt5b
ENSDARG00000041110	938.15	-2.13577	0.576288	-3.70609	0.000210485	0.000838316	dnajc3a
ENSDARG00000041113	686.148	-2.41964	0.513593	-4.7112	2.46259e-06	1.61898e-05	wdr18
ENSDARG00000041137	206.292	-2.50425	0.559291	-4.47755	7.55032e-06	4.43474e-05	dhrs13a.3
ENSDARG00000041140	731.509	-1.24909	0.48777	-2.56082	0.0104426	0.0244244	ddb2
ENSDARG00000041145	78.4562	-2.08116	0.816415	-2.54915	0.0107986	0.0251221	paqr5a
ENSDARG00000041199	298.365	-1.3297	0.517944	-2.56727	0.0102502	0.0240437	alg12
ENSDARG00000041217	1340.24	-1.93239	0.498911	-3.87321	0.000107412	0.000462735	xpo6
ENSDARG00000041226	1093.95	-2.12479	0.54971	-3.8653	0.000110952	0.000476414	cdc40
ENSDARG00000041243	1591.51	-1.87542	0.4677	-4.00987	6.07524e-05	0.000281599	setdb1a
ENSDARG00000041248	4605.4	-10.376	0.794694	-13.0566	5.8277e-39	2.64126e-36	si:dkey-241l7.6
ENSDARG00000041252	680.539	-2.98663	0.529244	-5.6432	1.66919e-08	1.79426e-07	gemin4
ENSDARG00000041332	775.49	-1.15977	0.479288	-2.41978	0.0155298	0.0343443	tmem33
ENSDARG00000041376	488.847	-1.57255	0.494368	-3.18092	0.00146806	0.00455393	rmi1
ENSDARG00000041378	97.4059	-2.21177	0.66132	-3.34448	0.000824369	0.00276508	sh2d4a
ENSDARG00000041381	460.726	-2.74916	0.589475	-4.66375	3.10502e-06	2.0028e-05	arntl2
ENSDARG00000041397	678.172	-1.54398	0.587941	-2.62608	0.00863741	0.0208568	eif2b2
ENSDARG00000041428	317.157	-1.75858	0.543881	-3.23338	0.00122334	0.00388669	yrdc
ENSDARG00000041503	344.78	-1.40608	0.579527	-2.42626	0.0152554	0.0338081	med4
ENSDARG00000041533	937.322	-2.18947	0.484834	-4.51592	6.30421e-06	3.77267e-05	ccdc130
ENSDARG00000041538	596.031	-1.41184	0.594861	-2.37339	0.0176258	0.0382819	mrps28
ENSDARG00000041575	192.843	-2.42511	0.56809	-4.26888	1.96453e-05	0.000103753	trmt10c
ENSDARG00000041623	1990.49	-4.00336	0.579404	-6.90944	4.86564e-12	1.03502e-10	mt2
ENSDARG00000041703	2162.21	-4.17862	0.555588	-7.52108	5.43263e-14	1.6151e-12	rrbp1b
ENSDARG00000041708	435.952	-1.65475	0.505672	-3.27238	0.00106646	0.00345399	kat14
ENSDARG00000041724	56.0176	-2.15059	0.826109	-2.60328	0.00923375	0.0220451	glipr2
ENSDARG00000041728	428.891	-2.06969	0.507027	-4.082	4.46491e-05	0.000215371	man1a2
ENSDARG00000041887	2079.77	-2.24576	0.499238	-4.49838	6.84744e-06	4.06382e-05	sf3a1
ENSDARG00000041895	2527.51	-3.11553	0.464717	-6.70414	2.02601e-11	3.86876e-10	cad
ENSDARG00000041896	465.713	-1.71117	0.502702	-3.40394	0.000664221	0.00229338	dnajc5ga
ENSDARG00000041991	1054.32	-2.43609	0.472041	-5.16076	2.45947e-07	2.06035e-06	rrp9
ENSDARG00000042005	445.958	-1.22464	0.505707	-2.42165	0.0154503	0.0341938	elp3
ENSDARG00000042025	372.035	-3.02765	0.565463	-5.35428	8.58958e-08	7.96482e-07	si:dkeyp-118h3.6
ENSDARG00000042031	272.614	-1.58977	0.528185	-3.00988	0.00261355	0.00747381	gorab
ENSDARG00000042032	23.4174	-3.05663	1.22928	-2.48652	0.0129	0.0292659	pou3f3a
ENSDARG00000042045	615.839	-1.19798	0.528742	-2.26572	0.0234688	0.0488606	hmg20b
ENSDARG00000042057	127.738	-1.47017	0.634152	-2.31832	0.020432	0.0433634	trmt1l
ENSDARG00000042063	1326.09	-7.95199	0.631452	-12.5932	2.30215e-36	7.98846e-34	si:ch211-145c1.1
ENSDARG00000042072	44.1564	-2.98773	0.86256	-3.4638	0.000532602	0.00189188	fbxl17
ENSDARG00000042116	526.473	-1.6427	0.512533	-3.20506	0.00135036	0.00423212	trim35-40
ENSDARG00000042126	83.2335	-3.50375	0.750479	-4.66868	3.03139e-06	1.95986e-05	elmo3
ENSDARG00000042129	7769.81	-10.4955	0.697923	-15.0382	4.1231e-51	4.57829e-48	zp3a.1
ENSDARG00000042130	6079.06	-9.52679	0.613763	-15.5219	2.4646e-54	4.56116e-51	zp3a.2
ENSDARG00000042213	192.47	-6.42489	0.880473	-7.29709	2.9405e-13	7.61102e-12	si:ch211-233h19.2
ENSDARG00000042214	237.585	-4.52539	0.625898	-7.23023	4.82162e-13	1.19241e-11	tmem243a
ENSDARG00000042232	108.05	-3.83428	0.727662	-5.26932	1.36929e-07	1.21346e-06	specc1lb
ENSDARG00000042329	138.731	-2.40856	0.73661	-3.2698	0.00107624	0.00348211	si:dkey-91m11.5
ENSDARG00000042336	81.2415	-2.4106	0.780994	-3.08658	0.00202473	0.00599296	impdh1a
ENSDARG00000042338	303.95	-1.38409	0.561873	-2.46335	0.0137644	0.0309392	lpar2a
ENSDARG00000042341	454.643	-1.99643	0.494216	-4.03958	5.35466e-05	0.000251941	tmem251
ENSDARG00000042344	339.45	-4.2595	0.575344	-7.4034	1.3274e-13	3.64908e-12	trmt6
ENSDARG00000042401	724.6	-1.53773	0.538071	-2.85785	0.00426522	0.0113999	derl2
ENSDARG00000042484	654.131	-2.20041	0.54319	-4.05091	5.10188e-05	0.000241685	tle2a
ENSDARG00000042508	720.502	-1.94442	0.480301	-4.04833	5.15849e-05	0.000243796	ubr3
ENSDARG00000042510	98.5715	-2.07171	0.652847	-3.17334	0.00150696	0.00465979	acot20
ENSDARG00000042520	1152.56	-1.4451	0.481488	-3.00132	0.00268812	0.00766136	UTP14C
ENSDARG00000042522	872.705	-1.56154	0.475315	-3.28528	0.00101883	0.00332282	katnbl1
ENSDARG00000042551	474.709	-1.56253	0.509653	-3.06587	0.00217039	0.00636977	mboat2b
ENSDARG00000042561	667.104	-2.17155	0.482139	-4.50399	6.66889e-06	3.96421e-05	lpar2b
ENSDARG00000042577	156.582	-2.0042	0.603481	-3.32107	0.000896718	0.00297985	batf3
ENSDARG00000042590	317.571	-1.88102	0.554599	-3.39168	0.000694647	0.00238693	rbm19
ENSDARG00000042608	107.278	-4.36461	1.03442	-4.21939	2.44966e-05	0.000126428	ica1
ENSDARG00000042630	289.479	-1.49612	0.545734	-2.74148	0.00611629	0.015504	hebp2
ENSDARG00000042671	390.594	-1.98563	0.508123	-3.90777	9.31524e-05	0.000409487	odr4
ENSDARG00000042688	550.238	-3.22848	0.786218	-4.10634	4.01982e-05	0.000195858	bora
ENSDARG00000042717	433.557	-1.82654	0.516313	-3.53765	0.0004037	0.00148951	adipor1b
ENSDARG00000042728	861.685	-1.65358	0.574682	-2.87739	0.00400981	0.0108228	plaa
ENSDARG00000042747	295.862	-1.6651	0.51859	-3.21082	0.00132356	0.0041575	coasy
ENSDARG00000042791	82.1456	-1.63913	0.693326	-2.36416	0.018071	0.0390885	git2b
ENSDARG00000042793	773.141	-2.42768	0.497912	-4.87572	1.08413e-06	7.7766e-06	tpp1
ENSDARG00000042821	683.356	-3.23129	0.682617	-4.73369	2.20475e-06	1.4686e-05	agps
ENSDARG00000042823	201.824	-2.01662	0.766984	-2.62928	0.00855664	0.0206887	spcs2
ENSDARG00000042837	1246.61	-2.24868	0.506982	-4.43543	9.18894e-06	5.2758e-05	atp1b3b
ENSDARG00000042859	124.952	-3.9688	0.728857	-5.44524	5.17361e-08	5.00416e-07	slc5a6a
ENSDARG00000042864	1709.11	-1.6645	0.46424	-3.58542	0.00033653	0.00126887	rpl7l1
ENSDARG00000042877	165.447	-1.72254	0.571354	-3.01484	0.00257116	0.00737159	heca
ENSDARG00000042900	532.459	-1.81083	0.582353	-3.1095	0.00187402	0.00561045	gtpbp1l
ENSDARG00000042902	184.996	-2.43125	0.718609	-3.38327	0.000716282	0.0024499	afg1lb
ENSDARG00000042995	362.138	-1.41204	0.525597	-2.68654	0.00721956	0.0178743	sptlc1
ENSDARG00000043012	49.5686	-2.45251	0.801912	-3.05833	0.00222574	0.00650642	napgb
ENSDARG00000043021	193.592	-1.42478	0.555509	-2.56482	0.0103228	0.0241874	slc26a11
ENSDARG00000043031	247.296	-1.59063	0.598233	-2.65888	0.00784003	0.0191731	ints10
ENSDARG00000043084	92.3482	-2.02118	0.705679	-2.86416	0.00418114	0.0112157	abhd17ab
ENSDARG00000043094	384.609	-2.76176	0.522228	-5.28841	1.23385e-07	1.10534e-06	gnas
ENSDARG00000043105	806.518	-2.96472	0.502113	-5.90449	3.53746e-09	4.42591e-08	qtrt1
ENSDARG00000043137	1658.4	-1.90961	0.672138	-2.84109	0.00449589	0.011926	cdca8
ENSDARG00000043179	759.598	-2.54556	0.522155	-4.87511	1.0875e-06	7.79827e-06	bag4
ENSDARG00000043185	565.362	-1.70042	0.533732	-3.1859	0.00144303	0.00448397	mllt1a
ENSDARG00000043209	707.763	-1.64512	0.542616	-3.03183	0.00243074	0.00702616	nsun5
ENSDARG00000043236	4317.13	-4.64359	0.786761	-5.90216	3.5878e-09	4.48636e-08	ccna1
ENSDARG00000043257	7994.71	-3.03859	0.612265	-4.96287	6.94606e-07	5.22024e-06	ckbb
ENSDARG00000043260	176.68	-3.01008	0.617323	-4.87601	1.0825e-06	7.76745e-06	xylb
ENSDARG00000043287	358.39	-1.81132	0.509669	-3.55392	0.000379533	0.00141089	atg101
ENSDARG00000043301	295.046	-2.47132	0.54235	-4.5567	5.19646e-06	3.18353e-05	gtf3c6
ENSDARG00000043304	750.314	-1.12893	0.493615	-2.28706	0.0221925	0.0465877	nop2
ENSDARG00000043307	302.212	-2.0362	0.531974	-3.82764	0.000129379	0.000545936	srd5a3
ENSDARG00000043339	789.722	-2.38361	0.534274	-4.4614	8.14247e-06	4.74241e-05	abraxas1
ENSDARG00000043357	1504.61	-2.00925	0.461892	-4.35004	1.36112e-05	7.52122e-05	tbl2
ENSDARG00000043359	980.364	-1.47428	0.482594	-3.0549	0.00225133	0.00656825	rmnd5b
ENSDARG00000043360	154.59	-2.50849	0.596425	-4.20587	2.60079e-05	0.00013333	dph3
ENSDARG00000043361	187.851	-1.86956	0.71058	-2.63103	0.00851263	0.0205958	nck2b
ENSDARG00000043404	615.372	-2.23462	0.485906	-4.59887	4.24794e-06	2.65592e-05	rpp21
ENSDARG00000043406	58.4698	-3.97115	1.1011	-3.60653	0.000310317	0.00117985	slc8a1b
ENSDARG00000043446	224.019	-1.9514	0.654047	-2.98358	0.00284897	0.0080578	efhd1
ENSDARG00000043492	75.3078	-5.52015	1.03427	-5.33726	9.43595e-08	8.67717e-07	irf1a
ENSDARG00000043510	348.955	-1.76686	0.520836	-3.39235	0.000692959	0.00238297	vamp4
ENSDARG00000043527	46.3533	-3.47109	0.908072	-3.82248	0.000132114	0.000555572	plpp6
ENSDARG00000043536	319.563	-2.01552	0.537162	-3.75216	0.000175317	0.000713082	si:dkey-86e18.1
ENSDARG00000043553	37.5638	-3.55766	0.962032	-3.69806	0.00021725	0.000861859	ches1
ENSDARG00000043559	734.187	-2.1643	0.486369	-4.44992	8.59019e-06	4.96541e-05	gle1
ENSDARG00000043562	262.969	-1.4747	0.52564	-2.80553	0.00502334	0.0131168	zgc:65997
ENSDARG00000043663	1118.33	-1.75566	0.50025	-3.50957	0.000448833	0.00163191	faub
ENSDARG00000043666	454.037	-2.7052	0.547703	-4.93917	7.84554e-07	5.82722e-06	abt1
ENSDARG00000043684	257.272	-1.74668	0.565011	-3.09141	0.00199209	0.00591131	bpnt1
ENSDARG00000043687	357.118	-3.17828	0.562794	-5.64732	1.62966e-08	1.75431e-07	si:ch211-59d15.9
ENSDARG00000043720	1407.69	-1.66754	0.598751	-2.78503	0.0053522	0.0138533	cdc45
ENSDARG00000043740	312.616	-2.06262	0.645731	-3.19424	0.00140201	0.00437364	efcab11
ENSDARG00000043746	98.3911	-2.37859	0.706355	-3.36741	0.000758774	0.0025699	nrxn3a
ENSDARG00000043797	2159.14	-2.48553	0.511913	-4.85538	1.20154e-06	8.50072e-06	cdc5l
ENSDARG00000043816	409.715	-5.1345	0.607877	-8.44661	2.99886e-17	1.42002e-15	st6galnac1.2
ENSDARG00000043865	947.408	-2.33306	0.578494	-4.03299	5.50707e-05	0.00025851	timm9
ENSDARG00000043877	364.121	-1.8599	0.602145	-3.08879	0.00200975	0.00595419	mmachc
ENSDARG00000043898	356.428	-2.73694	0.524941	-5.2138	1.85012e-07	1.59563e-06	timm10b
ENSDARG00000043905	268.119	-1.45223	0.522675	-2.77846	0.00546169	0.0140809	rnf14
ENSDARG00000043934	27.4361	-2.74153	1.20884	-2.2679	0.0233352	0.0486279	il17a/f2
ENSDARG00000043960	875.53	-2.10221	0.534281	-3.93465	8.33189e-05	0.000371183	rpf2
ENSDARG00000043963	1602	-6.20588	0.53851	-11.5242	9.96528e-31	2.03036e-28	si:ch211-241j12.3
ENSDARG00000043973	839.165	-1.66075	0.491399	-3.37964	0.00072582	0.00247415	znf292b
ENSDARG00000043976	3239.56	-1.30316	0.472373	-2.75875	0.00580225	0.0148364	etf1b
ENSDARG00000044002	319.566	-5.43652	0.681065	-7.98238	1.43543e-15	5.39965e-14	cyp2x7
ENSDARG00000044011	297.822	-2.69625	0.555114	-4.85711	1.19112e-06	8.44585e-06	xkrx
ENSDARG00000044038	625.274	-3.39678	0.695187	-4.88614	1.02832e-06	7.41401e-06	zbtb2a
ENSDARG00000044039	467.5	-2.54083	0.505792	-5.02347	5.07469e-07	3.92952e-06	stx11a
ENSDARG00000044062	300.94	-2.12665	0.629003	-3.38098	0.000722278	0.00246585	ctbp2a
ENSDARG00000044102	653.631	-1.19442	0.477586	-2.50094	0.0123863	0.0282446	znf593
ENSDARG00000044143	1018.47	-1.73701	0.466893	-3.72036	0.000198936	0.000797627	nol8
ENSDARG00000044161	23.0974	-2.87045	1.16092	-2.47256	0.013415	0.0302733	grid1b
ENSDARG00000044203	512.254	-2.02253	0.711106	-2.8442	0.0044523	0.0118288	sumf1
ENSDARG00000044225	531.305	-1.92234	0.558604	-3.44133	0.000578865	0.00203345	si:dkey-27b3.2
ENSDARG00000044265	330.924	-3.70318	0.544199	-6.80483	1.01169e-11	2.04623e-10	cdc37l1
ENSDARG00000044298	1451.65	-1.65701	0.544782	-3.0416	0.00235326	0.00683065	phax
ENSDARG00000044299	1188.4	-1.91644	0.471364	-4.06573	4.78815e-05	0.00022853	lmnb1
ENSDARG00000044301	914.895	-1.70794	0.546121	-3.12741	0.00176353	0.00532489	atf1
ENSDARG00000044304	796.793	-1.83418	0.479827	-3.82258	0.000132065	0.000555474	prrc1
ENSDARG00000044339	388.981	-1.67272	0.512398	-3.26448	0.00109664	0.00353728	rp2
ENSDARG00000044362	569.1	-2.51066	0.626408	-4.00803	6.1227e-05	0.00028329	unc119b
ENSDARG00000044381	282.86	-4.08025	0.616482	-6.6186	3.62616e-11	6.61947e-10	siah2l
ENSDARG00000044402	588.766	-1.21529	0.480209	-2.53075	0.0113818	0.0262833	nop16
ENSDARG00000044404	402.492	-1.95525	0.565781	-3.45585	0.000548569	0.00194022	pars2
ENSDARG00000044405	261.144	-2.14071	0.593866	-3.6047	0.00031251	0.00118718	ttc4
ENSDARG00000044484	467.722	-1.47733	0.572632	-2.5799	0.00988291	0.0233489	cdc23
ENSDARG00000044491	1068.89	-1.35798	0.602125	-2.25532	0.0241135	0.0499406	kif20a
ENSDARG00000044492	352.455	-1.92744	0.511995	-3.76457	0.000166837	0.00068184	ublcp1
ENSDARG00000044511	843.115	-4.23275	0.711176	-5.95177	2.65257e-09	3.40905e-08	etv5b
ENSDARG00000044513	457.817	-1.65546	0.555103	-2.98226	0.00286126	0.00808432	tpst1l
ENSDARG00000044514	223.173	-3.72502	0.658124	-5.66005	1.51325e-08	1.63773e-07	st6gal1
ENSDARG00000044556	268.034	-2.87659	0.549744	-5.2326	1.67146e-07	1.45454e-06	pacs1a
ENSDARG00000044567	469.54	-1.477	0.547311	-2.69864	0.00696232	0.0173379	ttc1
ENSDARG00000044584	444.589	-1.52634	0.498757	-3.0603	0.00221119	0.00647325	tex261
ENSDARG00000044596	276.962	-3.80156	0.563641	-6.74466	1.53389e-11	2.99338e-10	pgap2
ENSDARG00000044597	1434.06	-1.26765	0.528682	-2.39775	0.0164962	0.0361468	ncbp3
ENSDARG00000044627	216.518	-1.45252	0.538917	-2.69526	0.00703347	0.0174837	alg8
ENSDARG00000044642	123.097	-1.92469	0.638492	-3.01443	0.00257462	0.0073796	sc5d
ENSDARG00000044688	103.463	-5.53597	0.851849	-6.49877	8.09809e-11	1.39089e-09	dusp4
ENSDARG00000044691	574.652	-3.96603	0.515751	-7.68981	1.47354e-14	4.70855e-13	ppp1r3b
ENSDARG00000044752	322.315	-1.92959	0.63634	-3.03233	0.00242674	0.0070155	p2rx4a
ENSDARG00000044774	325.232	-6.12511	0.668871	-9.15739	5.31655e-20	3.65541e-18	pou5f3
ENSDARG00000044781	258.041	-3.69908	0.796131	-4.64631	3.37917e-06	2.16507e-05	bace2
ENSDARG00000044809	551.242	-1.30133	0.569258	-2.28601	0.0222537	0.0466984	fpgs
ENSDARG00000044811	955.659	-1.74524	0.612908	-2.84747	0.00440681	0.0117205	cdk9
ENSDARG00000044812	334.596	-1.67587	0.544372	-3.07853	0.00208022	0.00613758	ttc17
ENSDARG00000044820	949.587	-1.84457	0.549992	-3.35381	0.000797069	0.00268527	cstf1
ENSDARG00000044925	188.817	-1.50104	0.575452	-2.60845	0.00909529	0.0217636	cdk5rap1
ENSDARG00000044938	234.079	-2.68709	0.569112	-4.72155	2.34056e-06	1.547e-05	cbx2
ENSDARG00000044956	1749.28	-3.7315	0.504912	-7.3904	1.46388e-13	3.98405e-12	zgc:114123
ENSDARG00000044968	82.9885	-2.14099	0.702622	-3.04714	0.00231032	0.00672004	vcla
ENSDARG00000045027	322.246	-1.83964	0.540429	-3.40404	0.000663964	0.00229285	rab9a
ENSDARG00000045051	1215.98	-5.08499	0.559075	-9.09537	9.42629e-20	6.19346e-18	slc16a3
ENSDARG00000045074	563.475	-1.78325	0.521891	-3.4169	0.000633387	0.0021982	arl4d
ENSDARG00000045091	422.679	-1.9634	0.513324	-3.82487	0.000130841	0.000550989	mrpl10
ENSDARG00000045095	1171.39	-2.82784	0.579113	-4.88305	1.04456e-06	7.52439e-06	elac1
ENSDARG00000045129	276.168	-2.32486	0.660184	-3.52154	0.000429052	0.00157079	fkbp10b
ENSDARG00000045130	108.051	-2.63451	0.868294	-3.03412	0.00241235	0.00698118	klhl11
ENSDARG00000045139	862.035	-2.20167	0.509273	-4.32317	1.53803e-05	8.36145e-05	ca7
ENSDARG00000045140	375.527	-1.28673	0.533332	-2.41263	0.015838	0.0349354	lcmt1
ENSDARG00000045146	542.587	-1.58258	0.544796	-2.90491	0.00367364	0.0100387	tomm22
ENSDARG00000045147	697.487	-1.39806	0.515124	-2.71402	0.00664722	0.0166672	tmem184ba
ENSDARG00000045159	429.691	-1.70369	0.501876	-3.39463	0.000687204	0.00236611	zdhhc4
ENSDARG00000045172	248.987	-2.46844	0.541856	-4.55553	5.22529e-06	3.19943e-05	minpp1b
ENSDARG00000045199	357.677	-1.63581	0.546678	-2.99226	0.00276919	0.00785717	zgc:55262
ENSDARG00000045254	639.601	-2.62378	0.503613	-5.20992	1.88924e-07	1.6237e-06	zmp:0000000624
ENSDARG00000045262	244.497	-3.13316	0.586792	-5.33948	9.32153e-08	8.58617e-07	gsnb
ENSDARG00000045269	28.757	-2.53049	0.979397	-2.58372	0.00977415	0.023138	pts
ENSDARG00000045289	162.815	-3.4123	0.769755	-4.43297	9.29423e-06	5.32936e-05	gpr137c
ENSDARG00000045294	285.708	-2.01077	0.53706	-3.74403	0.000181092	0.000734421	sh3glb1a
ENSDARG00000045308	1468.15	-1.64102	0.478932	-3.42641	0.00061161	0.00213061	pola1
ENSDARG00000045331	436.202	-1.28999	0.503068	-2.56425	0.0103399	0.0242149	pkp4
ENSDARG00000045342	264.215	-1.47941	0.555479	-2.66331	0.00773772	0.0189584	si:ch211-140b10.6
ENSDARG00000045351	460.037	-3.29354	0.517538	-6.36387	1.9673e-10	3.18671e-09	ccdc58
ENSDARG00000045378	25.0105	-6.29524	1.67019	-3.76919	0.000163781	0.000671327	pi15a
ENSDARG00000045416	298.591	-1.46336	0.529343	-2.76448	0.0057013	0.0146139	mppe1
ENSDARG00000045417	209.743	-1.47103	0.571784	-2.5727	0.0100908	0.0237416	fam49bb
ENSDARG00000045422	294.672	-2.25041	0.522005	-4.31109	1.62455e-05	8.77382e-05	otulina
ENSDARG00000045423	9484.02	-12.0059	0.729269	-16.4629	6.77658e-61	3.76236e-57	si:ch211-146l10.8
ENSDARG00000045424	8575.92	-11.5922	0.819731	-14.1414	2.10959e-45	1.73518e-42	zgc:173856
ENSDARG00000045428	316.709	-1.78636	0.580846	-3.07545	0.00210187	0.00619159	mcee
ENSDARG00000045482	431.309	-4.17888	0.630692	-6.62587	3.45201e-11	6.32005e-10	stk38l
ENSDARG00000045493	131.403	-2.57621	0.776876	-3.31612	0.000912773	0.00302776	slc35e3
ENSDARG00000045514	2557.27	-1.19918	0.523431	-2.29099	0.0219637	0.0461641	atp5f1c
ENSDARG00000045518	251.758	-2.69299	0.689029	-3.90838	9.29174e-05	0.000408616	tmem110l
ENSDARG00000045542	342.467	-1.34669	0.508137	-2.65024	0.00804336	0.0195927	lamtor4
ENSDARG00000045562	828.383	-2.67608	0.480474	-5.56966	2.55233e-08	2.64129e-07	pus1
ENSDARG00000045565	527.79	-1.66541	0.492779	-3.37963	0.000725824	0.00247415	noc4l
ENSDARG00000045567	464.244	-1.69579	0.517032	-3.27985	0.00103864	0.00337618	phpt1
ENSDARG00000045596	42.6108	-3.1145	0.923151	-3.37377	0.000741475	0.00251982	rassf8a
ENSDARG00000045601	1239.03	-3.92376	0.785997	-4.99209	5.97308e-07	4.54593e-06	cax1
ENSDARG00000045620	1442.2	-2.09021	0.564529	-3.70257	0.000213424	0.000848651	nansa
ENSDARG00000045641	553.345	-2.34996	0.491286	-4.78328	1.72458e-06	1.17881e-05	usp3
ENSDARG00000045680	1673.85	-1.3253	0.508622	-2.60566	0.00916973	0.0219181	tnpo3
ENSDARG00000045681	616.736	-2.65926	0.487791	-5.45165	4.99054e-08	4.85032e-07	irf5
ENSDARG00000045687	46.1078	-4.31301	1.15749	-3.72618	0.000194401	0.000781968	pdzrn4
ENSDARG00000045747	55.2377	-2.18195	0.853806	-2.55556	0.0106017	0.0247495	cped1
ENSDARG00000045749	806.232	-1.94216	0.678465	-2.86259	0.00420197	0.0112566	ppfibp1a
ENSDARG00000045758	13.8609	-5.69823	1.79877	-3.16785	0.00153572	0.00473158	cracr2ab
ENSDARG00000045773	380.533	-1.95052	0.534581	-3.64868	0.000263587	0.00102113	PYURF
ENSDARG00000045789	294.43	-5.11595	0.615404	-8.31316	9.31831e-17	4.13056e-15	srgap1b
ENSDARG00000045814	536.789	-1.34766	0.487578	-2.76399	0.00571001	0.0146305	samm50
ENSDARG00000045815	880.28	-2.34054	0.508036	-4.60703	4.08453e-06	2.57039e-05	mcm10
ENSDARG00000045857	1253.93	-2.48511	0.579083	-4.29146	1.775e-05	9.48487e-05	cebpz
ENSDARG00000045858	127.274	-1.49701	0.636969	-2.35021	0.0187629	0.040318	tigarb
ENSDARG00000045885	884.565	-1.34292	0.490705	-2.73672	0.00620557	0.0156945	scaf11
ENSDARG00000045888	670.43	-1.57774	0.507497	-3.10887	0.00187803	0.00561789	acat1
ENSDARG00000045927	142.35	-3.26272	0.641898	-5.08293	3.71664e-07	2.97224e-06	slc25a44a
ENSDARG00000046053	414.713	-2.14518	0.728981	-2.94272	0.00325347	0.00904859	slc27a6
ENSDARG00000046074	1416.24	-1.12551	0.459282	-2.4506	0.014262	0.0319188	stk11
ENSDARG00000046087	131.411	-2.07141	0.609693	-3.39746	0.000680149	0.002344	brd2b
ENSDARG00000046124	166.578	-4.19543	0.670372	-6.25837	3.89022e-10	5.95001e-09	rab11fip1a
ENSDARG00000046133	363.813	-1.40269	0.506686	-2.76836	0.00563389	0.0144625	b3galnt2
ENSDARG00000051748	246.639	-3.8033	0.861799	-4.41321	1.01848e-05	5.80702e-05	ccnd2a
ENSDARG00000051760	9.54865	-6.44704	2.24538	-2.87124	0.00408866	0.0109982	igl4v10
ENSDARG00000051785	150.872	-2.811	0.697803	-4.02835	5.61694e-05	0.000263222	dhx33
ENSDARG00000051809	61.4535	-3.49873	0.831519	-4.20764	2.58055e-05	0.000132476	btr12
ENSDARG00000051816	74.6176	-1.91861	0.747007	-2.5684	0.010217	0.0239799	aass
ENSDARG00000051851	473.401	-2.77932	0.55728	-4.9873	6.12281e-07	4.65032e-06	ctu2
ENSDARG00000051854	1766.93	-3.81941	0.639976	-5.96806	2.40095e-09	3.11814e-08	cdt1
ENSDARG00000051874	290.686	-1.23664	0.523125	-2.36394	0.0180816	0.0391075	stra6
ENSDARG00000051886	173.698	-1.81272	0.687318	-2.63738	0.0083548	0.0202603	ankrd11
ENSDARG00000051889	448.333	-2.11754	0.585214	-3.6184	0.00029643	0.00113375	dhodh
ENSDARG00000051902	788.109	-2.96752	0.480815	-6.17185	6.74962e-10	9.86804e-09	prmt7
ENSDARG00000051915	46.4661	-2.79124	1.03127	-2.70661	0.00679744	0.0169768	pde5ab
ENSDARG00000051916	916.517	-2.45511	0.483785	-5.0748	3.87895e-07	3.09091e-06	cdk7
ENSDARG00000051923	5323.61	-3.13813	0.544328	-5.76515	8.15829e-09	9.39239e-08	ccnb1
ENSDARG00000051934	202.475	-2.15426	0.643529	-3.34757	0.000815242	0.00273736	kxd1
ENSDARG00000052025	329.052	-1.67722	0.527178	-3.18151	0.00146511	0.00454558	pomgnt1
ENSDARG00000052073	1199.77	-1.24798	0.468436	-2.66413	0.00771871	0.0189202	blcap
ENSDARG00000052089	40.4119	-2.17815	0.848626	-2.56668	0.0102678	0.0240777	CCKAR
ENSDARG00000052103	758.175	-1.80008	0.502439	-3.58269	0.000340076	0.00128137	dtymk
ENSDARG00000052109	685.621	-2.36311	0.739249	-3.19664	0.00139039	0.00434286	zgc:114041
ENSDARG00000052124	536.956	-2.78581	0.531522	-5.2412	1.59538e-07	1.39599e-06	accs
ENSDARG00000052131	35.3678	-2.87056	1.10764	-2.5916	0.0095531	0.0227196	gli3
ENSDARG00000052164	204.404	-1.95599	0.58079	-3.36781	0.000757681	0.00256738	znf507
ENSDARG00000052190	604.247	-2.35022	0.627017	-3.74825	0.000178074	0.000723369	fdx2
ENSDARG00000052247	708.997	-1.66457	0.581654	-2.86178	0.00421272	0.0112772	alkbh4
ENSDARG00000052290	204.624	-1.72364	0.650034	-2.65161	0.00801085	0.0195311	rab33ba
ENSDARG00000052330	149.436	-4.19304	0.688745	-6.08795	1.14369e-09	1.59742e-08	slc4a2b
ENSDARG00000052334	1456.21	-3.14755	0.490057	-6.42283	1.33765e-10	2.23525e-09	ociad1
ENSDARG00000052344	644.806	-1.8743	0.48988	-3.82603	0.000130225	0.000548668	tbl3
ENSDARG00000052375	417.212	-3.43054	0.556849	-6.16063	7.24573e-10	1.04898e-08	zgc:66455
ENSDARG00000052379	962.255	-1.69158	0.56516	-2.99309	0.00276168	0.00783989	ccdc22
ENSDARG00000052386	26.0127	-2.8876	1.0556	-2.73551	0.00622839	0.0157379	cldnd1b
ENSDARG00000052427	491.582	-1.74449	0.602331	-2.89623	0.00377675	0.010285	bicdl2
ENSDARG00000052455	181.401	-1.82465	0.58291	-3.13024	0.00174664	0.00528394	porcnl
ENSDARG00000052471	425.062	-2.14967	0.504757	-4.25883	2.055e-05	0.000108018	taf1a
ENSDARG00000052480	1176.47	-1.77487	0.473358	-3.74953	0.000177163	0.000719801	pdcd11
ENSDARG00000052520	36.739	-2.82462	0.981569	-2.87765	0.00400646	0.0108151	sgms2a
ENSDARG00000052527	53.1622	-2.01868	0.846993	-2.38335	0.0171557	0.0374257	mul1b
ENSDARG00000052536	1664.24	-1.84418	0.482707	-3.8205	0.000133183	0.000559725	tia1
ENSDARG00000052553	475.29	-1.20518	0.507264	-2.37584	0.017509	0.0380842	lig3
ENSDARG00000052606	561.763	-1.23304	0.482991	-2.55292	0.0106825	0.024904	dpp9
ENSDARG00000052638	267.484	-1.93353	0.736574	-2.62503	0.00866419	0.0209089	fam210b
ENSDARG00000052644	462.111	-2.12334	0.846559	-2.5082	0.0121346	0.027762	ca10a
ENSDARG00000052658	28.779	-2.91051	1.14035	-2.5523	0.0107015	0.0249379	pptc7b
ENSDARG00000052721	735.954	-1.75474	0.537782	-3.26293	0.00110268	0.00355419	prim2
ENSDARG00000052747	697.505	-1.53492	0.534774	-2.87021	0.00410195	0.0110273	gpatch3
ENSDARG00000052816	1608.08	-1.84803	0.498951	-3.70383	0.000212369	0.000844912	shmt1
ENSDARG00000052818	231.56	-5.28313	0.711782	-7.42239	1.15025e-13	3.19708e-12	smcr8a
ENSDARG00000052866	472.642	-1.47576	0.502931	-2.93431	0.00334285	0.00926484	htt
ENSDARG00000052894	131.36	-2.18727	0.750193	-2.91561	0.00354991	0.00974888	znf532
ENSDARG00000052903	404.201	-3.25507	0.533796	-6.09797	1.07426e-09	1.50804e-08	rtkn2b
ENSDARG00000052917	57.2201	-2.68814	1.1515	-2.33448	0.0195707	0.041787	si:ch211-202f3.3
ENSDARG00000052923	210.967	-2.55064	0.594128	-4.29308	1.76211e-05	9.4228e-05	zgc:113162
ENSDARG00000052942	120.081	-1.57322	0.653227	-2.40838	0.0160234	0.0352911	aspg
ENSDARG00000053082	503.48	-2.22904	0.551817	-4.03946	5.35733e-05	0.000251992	thada
ENSDARG00000053087	219.012	-1.89457	0.564555	-3.35587	0.000791166	0.00266781	mthfr
ENSDARG00000053127	230.709	-1.60389	0.632209	-2.53696	0.0111819	0.0258864	helb
ENSDARG00000053129	582.182	-1.8331	0.673937	-2.71999	0.00652833	0.0164062	carhsp1
ENSDARG00000053138	841.857	-2.70232	0.537555	-5.02705	4.98076e-07	3.86218e-06	lrrc47
ENSDARG00000053155	389.804	-2.19434	0.607136	-3.61425	0.000301218	0.00114979	alg3
ENSDARG00000053201	99.6653	-3.59658	1.30792	-2.74984	0.00596251	0.0151731	zgc:172323
ENSDARG00000053204	32.086	-2.18463	0.92077	-2.37261	0.017663	0.0383428	snx22
ENSDARG00000053246	988.903	-6.32197	0.566725	-11.1553	6.74982e-29	1.15308e-26	depdc7b
ENSDARG00000053263	423.748	-1.85363	0.631916	-2.93335	0.00335321	0.00928877	zgc:113372
ENSDARG00000053269	685.36	-4.7596	0.547433	-8.6944	3.48675e-18	1.88403e-16	slc2a15b
ENSDARG00000053326	149.069	-2.26726	0.922742	-2.45709	0.0140067	0.0314172	gna11b
ENSDARG00000053344	36.4169	-5.53689	1.23782	-4.47309	7.70966e-06	4.51281e-05	adgrd1
ENSDARG00000053448	200.867	-3.28808	1.2248	-2.68458	0.00726208	0.0179595	si:ch211-251f6.6
ENSDARG00000053483	825.227	-4.03137	0.506141	-7.96493	1.65324e-15	6.06861e-14	zgc:113054
ENSDARG00000053485	714.303	-1.27168	0.509125	-2.49777	0.0124977	0.0284636	aldh6a1
ENSDARG00000053496	766.207	-2.47524	0.485882	-5.09433	3.49985e-07	2.81369e-06	gemin8
ENSDARG00000053505	452.197	-1.45199	0.541451	-2.68166	0.00732578	0.0180928	fbxo22
ENSDARG00000053527	120.863	-2.02567	0.640905	-3.16064	0.00157422	0.00483212	snx24
ENSDARG00000053535	1070.68	-4.87955	0.529914	-9.20818	3.31696e-20	2.33084e-18	lmo7b
ENSDARG00000053685	692.424	-1.76982	0.541965	-3.26556	0.00109249	0.00352647	gtf2a2
ENSDARG00000053691	740.631	-1.47872	0.514328	-2.87505	0.00403967	0.0108885	maea
ENSDARG00000053695	436.489	-2.47813	0.508454	-4.87387	1.09436e-06	7.83982e-06	zgc:162948
ENSDARG00000053713	480.477	-2.3183	0.528437	-4.3871	1.14872e-05	6.46826e-05	ccdc88c
ENSDARG00000053716	396.45	-1.88801	0.501019	-3.76834	0.000164339	0.000673243	zgc:153990
ENSDARG00000053792	317.22	-2.1287	0.758955	-2.80478	0.00503506	0.0131443	si:rp71-1g18.1
ENSDARG00000053805	246.421	-1.34362	0.586087	-2.29253	0.0218751	0.0459952	trub1
ENSDARG00000053810	1242.96	-2.48197	0.491355	-5.05127	4.38874e-07	3.45132e-06	hnrnpc
ENSDARG00000053840	47.8536	-3.07598	0.859719	-3.57789	0.000346378	0.00130246	ei24
ENSDARG00000053877	1120.45	-3.73584	0.48763	-7.66122	1.84168e-14	5.81885e-13	cpdb
ENSDARG00000053890	94.9184	-3.30583	0.733822	-4.50495	6.6389e-06	3.94743e-05	tmem62
ENSDARG00000053912	1910.48	-1.30231	0.48821	-2.66752	0.00764128	0.0187553	fbl
ENSDARG00000053918	52.13	-1.79679	0.783929	-2.29204	0.0219036	0.0460508	srfa
ENSDARG00000053939	76.6864	-4.57359	0.884318	-5.17189	2.3174e-07	1.9552e-06	tgfa
ENSDARG00000053959	234.385	-4.61766	0.619329	-7.45591	8.92513e-14	2.54441e-12	cdc42ep2
ENSDARG00000053963	2918.16	-4.07946	0.490398	-8.31866	8.89605e-17	3.95919e-15	npm2b
ENSDARG00000053995	229.836	-1.38335	0.538408	-2.56934	0.0101893	0.0239328	gpank1
ENSDARG00000054032	270.294	-2.03955	0.642774	-3.17304	0.00150853	0.00466333	rab24
ENSDARG00000054122	550.526	-3.1911	0.544608	-5.85944	4.64423e-09	5.65455e-08	tmem30b
ENSDARG00000054128	296.495	-1.52252	0.563231	-2.7032	0.00686759	0.0171366	im:7136021
ENSDARG00000054164	522.18	-1.79882	0.51321	-3.50503	0.00045655	0.00165671	mrps17
ENSDARG00000054196	64.3631	-2.23093	0.753998	-2.95879	0.00308845	0.00864377	slc38a8b
ENSDARG00000054208	308.581	-1.72132	0.524109	-3.28427	0.00102248	0.00333243	phkg2
ENSDARG00000054211	558.9	-3.27861	0.501076	-6.54313	6.02429e-11	1.05677e-09	st8sia7.1
ENSDARG00000054224	446.941	-2.14182	0.50746	-4.22066	2.43587e-05	0.000125746	ipo11
ENSDARG00000054250	174.627	-1.58127	0.562391	-2.8117	0.00492805	0.0129013	crbn
ENSDARG00000054251	33.9833	-3.13274	1.06066	-2.95357	0.00314116	0.0087681	pqlc3
ENSDARG00000054301	250.676	-2.05694	0.655017	-3.14029	0.00168782	0.00513536	kti12
ENSDARG00000054302	173.383	-2.46862	0.823632	-2.99724	0.0027244	0.00774991	ehd4
ENSDARG00000054304	435.994	-3.78713	0.563155	-6.72484	1.75786e-11	3.39466e-10	homeza
ENSDARG00000054307	440.533	-3.5675	0.593103	-6.01498	1.79914e-09	2.39971e-08	zgc:77151
ENSDARG00000054312	449.919	-1.93258	0.551264	-3.50572	0.000455377	0.00165299	slc38a6
ENSDARG00000054313	916.653	-6.03384	0.653895	-9.22754	2.76918e-20	1.97743e-18	si:ch211-14a17.6
ENSDARG00000054320	1852.66	-1.14306	0.473032	-2.41646	0.0156721	0.0346177	ap2a1
ENSDARG00000054334	1510.02	-2.0044	0.459594	-4.36124	1.29327e-05	7.19641e-05	dctpp1
ENSDARG00000054337	695.915	-2.16012	0.483101	-4.47137	7.77204e-06	4.54214e-05	ap1g2
ENSDARG00000054374	905.298	-1.98332	0.536267	-3.69837	0.000216985	0.000860964	alg13
ENSDARG00000054446	266.777	-1.82839	0.672533	-2.71866	0.00655479	0.0164633	ccdc43
ENSDARG00000054473	567.526	-2.08953	0.555073	-3.76442	0.000166937	0.000682122	tinf2
ENSDARG00000054583	348.157	-2.46771	0.592881	-4.16224	3.15141e-05	0.000157841	mfsd6b
ENSDARG00000054606	617.139	-2.51888	0.515299	-4.8882	1.01765e-06	7.34001e-06	mrpl1
ENSDARG00000054746	525.543	-1.78564	0.626009	-2.85242	0.00433879	0.0115687	uggt1
ENSDARG00000054748	142.605	-1.83367	0.683568	-2.6825	0.00730748	0.0180539	cuedc1b
ENSDARG00000054749	266.214	-3.07464	0.548958	-5.60086	2.13289e-08	2.24489e-07	lmo4b
ENSDARG00000054778	459.938	-1.93942	0.537837	-3.60596	0.000310999	0.00118184	pogza
ENSDARG00000054786	1962.18	-4.06118	0.691152	-5.87595	4.20414e-09	5.17547e-08	faah2b
ENSDARG00000054814	193.6	-1.94162	0.632784	-3.06839	0.00215219	0.00632639	si:ch211-251p5.5
ENSDARG00000054903	935.83	-1.55301	0.492531	-3.15313	0.00161531	0.00494319	mta3
ENSDARG00000054934	290.453	-3.34937	0.547791	-6.11432	9.69692e-10	1.37078e-08	zgc:101765
ENSDARG00000054963	1231.1	-4.29814	0.508923	-8.44556	3.02583e-17	1.42974e-15	alg1
ENSDARG00000054984	143.155	-1.90128	0.629928	-3.01824	0.00254246	0.00730346	zbtb41
ENSDARG00000055066	73.6378	-2.07204	0.726082	-2.85373	0.00432086	0.0115251	zdhhc20a
ENSDARG00000055075	1601.58	-2.74956	0.638596	-4.30563	1.66509e-05	8.96881e-05	svila
ENSDARG00000055086	1576.99	-1.32878	0.478239	-2.77848	0.00546135	0.0140809	ggnbp2
ENSDARG00000055113	1177.76	-2.43923	0.526807	-4.63021	3.65297e-06	2.31919e-05	pom121
ENSDARG00000055151	729.102	-1.60426	0.624893	-2.56726	0.0102506	0.0240437	smyd2a
ENSDARG00000055163	129.547	-2.4369	0.76061	-3.20387	0.00135594	0.00424751	epoa
ENSDARG00000055232	310.907	-1.65502	0.555867	-2.97738	0.00290728	0.00820078	fancc
ENSDARG00000055250	3247.06	-6.29672	0.482914	-13.039	7.34e-39	3.19621e-36	si:ch211-132b12.8
ENSDARG00000055300	972.169	-3.16804	0.633667	-4.99954	5.74683e-07	4.39633e-06	atxn7l2a
ENSDARG00000055314	1076.1	-1.6116	0.4871	-3.30855	0.00093779	0.00310056	mcmbp
ENSDARG00000055395	54.2543	-4.27791	1.08115	-3.95681	7.59579e-05	0.000342443	foxq1b
ENSDARG00000055415	6476.84	-9.41806	0.923226	-10.2012	1.95745e-24	2.25238e-22	zp2l1
ENSDARG00000055426	594.751	-2.65458	0.500242	-5.3066	1.11688e-07	1.00951e-06	rwdd2b
ENSDARG00000055433	53.6226	-2.37567	0.790062	-3.00694	0.00263889	0.00753562	vps26bl
ENSDARG00000055443	233.172	-1.76222	0.55025	-3.20257	0.00136206	0.00426497	zcchc7
ENSDARG00000055445	102.072	-1.96408	0.642871	-3.05517	0.00224937	0.00656511	slc22a15
ENSDARG00000055463	137.135	-2.43371	0.689852	-3.52787	0.000418916	0.001539	lrit3a
ENSDARG00000055470	1125.89	-2.63677	0.480125	-5.49183	3.97783e-08	3.95256e-07	cdc16
ENSDARG00000055477	746.758	-1.58277	0.525753	-3.01048	0.00260831	0.00745981	pelo
ENSDARG00000055481	697.757	-1.87788	0.597837	-3.14113	0.00168298	0.00512204	atf7b
ENSDARG00000055490	63.8541	-3.06235	0.795529	-3.84945	0.000118385	0.000504914	galnt12
ENSDARG00000055510	672.252	-2.54	0.524906	-4.83897	1.30516e-06	9.1667e-06	ypel3
ENSDARG00000055561	372.324	-2.42822	0.556395	-4.36421	1.27581e-05	7.11175e-05	c1galt1b
ENSDARG00000055563	1311.52	-1.97142	0.490132	-4.02222	5.76512e-05	0.000269318	drosha
ENSDARG00000055566	627.865	-1.49949	0.651683	-2.30095	0.0213946	0.0450918	mastl
ENSDARG00000055620	338.386	-2.20311	0.523612	-4.20751	2.58194e-05	0.000132516	acad9
ENSDARG00000055629	371.204	-3.7509	0.626481	-5.98726	2.13405e-09	2.80431e-08	dia1b
ENSDARG00000055630	384.422	-7.08893	0.708429	-10.0066	1.42638e-23	1.50843e-21	foxh1
ENSDARG00000055642	91.794	-4.44181	0.879288	-5.0516	4.38123e-07	3.44663e-06	si:ch211-217a12.1
ENSDARG00000055655	1229.16	-9.33441	0.821158	-11.3674	6.07865e-30	1.1538e-27	birc5b
ENSDARG00000055659	192.349	-4.04836	0.631077	-6.415	1.40819e-10	2.34255e-09	gpr161
ENSDARG00000055676	421.492	-1.94501	0.676071	-2.87693	0.00401567	0.0108333	armt1
ENSDARG00000055708	619.939	-1.94229	0.499771	-3.88637	0.000101753	0.000441959	timm8b
ENSDARG00000055719	510.717	-2.14879	0.500479	-4.29347	1.75905e-05	9.40873e-05	ino80c
ENSDARG00000055722	189.796	-2.05102	0.882673	-2.32365	0.0201445	0.0428433	bco2a
ENSDARG00000055730	831.041	-7.35251	0.698002	-10.5337	6.0437e-26	7.8952e-24	trim35-29
ENSDARG00000055753	447.746	-1.34821	0.49209	-2.73977	0.00614827	0.0155708	suv39h1b
ENSDARG00000055760	450.786	-2.34599	0.542281	-4.32615	1.51738e-05	8.2738e-05	srm
ENSDARG00000055763	764.587	-1.25191	0.490483	-2.55239	0.0106986	0.0249339	tmem115
ENSDARG00000055797	308.074	-2.90352	0.55712	-5.21165	1.87168e-07	1.61172e-06	cnpy4
ENSDARG00000055809	402.172	-7.5001	1.52097	-4.93113	8.17574e-07	6.04166e-06	vtg2
ENSDARG00000055833	1161.39	-9.79042	0.924073	-10.5948	3.14855e-26	4.16209e-24	si:dkey-216e24.3
ENSDARG00000055837	1172	-1.43101	0.540896	-2.64562	0.00815405	0.0198276	arhgef1b
ENSDARG00000055838	430.099	-1.81952	0.501281	-3.62974	0.00028371	0.00109045	mettl16
ENSDARG00000055885	999.14	-2.28294	0.47112	-4.84579	1.26112e-06	8.88263e-06	tex10
ENSDARG00000055934	281.831	-1.29495	0.547243	-2.36632	0.017966	0.0388992	si:ch1073-416j23.1
ENSDARG00000055969	886.502	-1.75895	0.492374	-3.57239	0.000353736	0.00132699	rfc3
ENSDARG00000055970	234.237	-1.61042	0.630869	-2.5527	0.0106892	0.0249144	zgc:136971
ENSDARG00000055973	3751.8	-5.65942	0.588064	-9.62381	6.3435e-22	5.46033e-20	zar1l
ENSDARG00000055991	99.0635	-1.59306	0.638021	-2.49688	0.0125293	0.0285181	hmbsb
ENSDARG00000056008	2878.26	-1.48483	0.48194	-3.08096	0.00206338	0.00609355	atp5mc1
ENSDARG00000056078	304.68	-2.45536	0.792501	-3.09824	0.00194672	0.00579606	rftn2
ENSDARG00000056079	492.915	-1.19378	0.493162	-2.42066	0.0154923	0.0342716	l3mbtl2
ENSDARG00000056080	41.6274	-4.55229	1.20427	-3.78014	0.000156743	0.000645455	si:dkey-191g9.5
ENSDARG00000056128	182.356	-2.03053	0.562623	-3.60904	0.000307332	0.00117031	fastkd1
ENSDARG00000056130	22.7156	-2.90078	1.14148	-2.54123	0.0110462	0.0256095	neurog1
ENSDARG00000056160	2648.93	-1.99859	0.486339	-4.10946	3.96583e-05	0.000193482	hspd1
ENSDARG00000056162	310.302	-2.20075	0.519842	-4.2335	2.3008e-05	0.0001193	nr2c2ap
ENSDARG00000056165	416.617	-4.99239	0.608647	-8.20243	2.35574e-16	9.85241e-15	si:ch211-215a10.4
ENSDARG00000056184	351.975	-2.21141	0.535997	-4.1258	3.69454e-05	0.000181643	dvl2
ENSDARG00000056210	71.3105	-2.55344	0.738338	-3.45836	0.000543469	0.00192402	si:ch211-199o1.2
ENSDARG00000056218	278.583	-2.72072	0.613613	-4.43393	9.25327e-06	5.30862e-05	tnika
ENSDARG00000056245	24.1821	-3.07738	1.14691	-2.6832	0.00729212	0.0180258	zgc:162952
ENSDARG00000056258	2018.87	-2.01492	0.496325	-4.05967	4.91423e-05	0.000233945	cdc27
ENSDARG00000056268	776.072	-2.46315	0.491132	-5.01524	5.29664e-07	4.08856e-06	atxn7l2b
ENSDARG00000056270	379.257	-2.07141	0.531544	-3.89697	9.74029e-05	0.000425309	atpaf2
ENSDARG00000056328	119.41	-2.23118	0.849482	-2.62652	0.0086262	0.0208319	rhot2
ENSDARG00000056347	189.881	-1.26756	0.552073	-2.29601	0.0216754	0.0456038	rab3aa
ENSDARG00000056367	234.74	-1.2525	0.540354	-2.31793	0.0204533	0.043392	mpv17l2
ENSDARG00000056369	491.382	-1.13996	0.49762	-2.29083	0.0219732	0.0461797	ufsp2
ENSDARG00000056376	37.5719	-2.55839	0.919269	-2.78308	0.00538462	0.0139215	ankrd37
ENSDARG00000056410	869.693	-1.46018	0.563994	-2.58899	0.00962571	0.0228629	fdx1
ENSDARG00000056462	4424.12	-9.74187	0.615539	-15.8266	2.04025e-56	5.03443e-53	crp2
ENSDARG00000056479	702.784	-1.40654	0.492271	-2.85725	0.00427334	0.0114189	rab1bb
ENSDARG00000056509	625.222	-2.12989	0.488154	-4.36316	1.28197e-05	7.13778e-05	pdik1l
ENSDARG00000056515	817.356	-3.53852	0.570828	-6.19892	5.68505e-10	8.42814e-09	spsb1
ENSDARG00000056517	928.394	-2.48981	0.540456	-4.60687	4.08781e-06	2.57173e-05	thoc3
ENSDARG00000056549	584.678	-1.4056	0.491463	-2.86004	0.00423594	0.0113285	vps26a
ENSDARG00000056557	1391.37	-1.72782	0.482156	-3.58352	0.000338994	0.00127773	copb1
ENSDARG00000056559	466.246	-2.00604	0.501647	-3.99891	6.36342e-05	0.000292707	ccz1
ENSDARG00000056623	449.873	-1.97664	0.591668	-3.3408	0.000835378	0.00279862	ptenb
ENSDARG00000056665	893.021	-1.34327	0.501962	-2.67604	0.00744974	0.01835	nsun2
ENSDARG00000056666	52.2502	-3.37614	1.01178	-3.33682	0.000847413	0.00283496	sp8b
ENSDARG00000056683	116.799	-2.74463	0.635955	-4.31576	1.59058e-05	8.61552e-05	cdk5
ENSDARG00000056691	756.462	-3.76606	0.496307	-7.58816	3.24482e-14	9.96693e-13	cpeb4a
ENSDARG00000056695	1215.84	-2.57705	0.476255	-5.41107	6.2648e-08	5.97889e-07	phc2a
ENSDARG00000056717	363.661	-1.74319	0.539028	-3.23395	0.0012209	0.00388282	vars2
ENSDARG00000056720	924.056	-2.08755	0.483701	-4.31579	1.59034e-05	8.61552e-05	utp3
ENSDARG00000056741	832.178	-2.77646	0.480693	-5.77596	7.65166e-09	8.848e-08	senp3b
ENSDARG00000056801	865.411	-1.46678	0.481984	-3.04322	0.00234065	0.00679937	sufu
ENSDARG00000056829	293.191	-2.5046	0.702562	-3.56495	0.00036393	0.00136063	zmp:0000000662
ENSDARG00000056842	67.7098	-2.16935	0.887589	-2.44409	0.0145216	0.0324116	usp30
ENSDARG00000056923	984.875	-2.11053	0.471563	-4.47561	7.6192e-06	4.46929e-05	dbr1
ENSDARG00000056985	431.834	-1.54409	0.530674	-2.90967	0.00361805	0.00990382	tpte
ENSDARG00000056995	256.546	-2.31544	0.720138	-3.21527	0.00130323	0.00410236	snai1a
ENSDARG00000057004	34.237	-2.91071	0.978892	-2.97347	0.00294449	0.00828522	si:ch211-287a12.9
ENSDARG00000057042	227.95	-1.78294	0.551016	-3.23574	0.00121329	0.0038614	tm2d1
ENSDARG00000057062	22.9124	-3.29998	1.18748	-2.77898	0.00545306	0.014062	si:dkey-157g16.6
ENSDARG00000057101	370.463	-2.56867	0.588722	-4.36314	1.28209e-05	7.13778e-05	rnf180
ENSDARG00000057105	205.069	-1.32473	0.55082	-2.40502	0.0161715	0.035537	nle1
ENSDARG00000057110	593.029	-2.28399	0.519281	-4.39837	1.09068e-05	6.17271e-05	slc25a1a
ENSDARG00000057121	1341.94	-3.69968	0.908966	-4.07021	4.69714e-05	0.000224912	c7b
ENSDARG00000057138	224.814	-3.62732	0.585874	-6.1913	5.96719e-10	8.81112e-09	zgc:174164
ENSDARG00000057166	30.7051	-3.57007	1.02776	-3.47363	0.000513467	0.001833	lrmda
ENSDARG00000057184	823.777	-2.15087	0.497936	-4.31958	1.56329e-05	8.48424e-05	zgc:55781
ENSDARG00000057238	394.596	-2.13491	0.568009	-3.75858	0.000170879	0.000696309	si:dkey-30k6.5
ENSDARG00000057255	804.295	-1.74241	0.50999	-3.41656	0.000634178	0.00219967	emc1
ENSDARG00000057286	321.974	-1.87453	0.631332	-2.96917	0.00298605	0.00838889	swap70b
ENSDARG00000057322	316.103	-1.36698	0.579027	-2.36081	0.0182349	0.0393931	tmem47
ENSDARG00000057328	1295.44	-8.02401	0.733028	-10.9464	6.9151e-28	1.08148e-25	cth1
ENSDARG00000057374	65.2808	-2.52854	0.989873	-2.55441	0.0106368	0.0248132	sfxn3
ENSDARG00000057394	106.29	-2.33949	0.695544	-3.36355	0.000769482	0.00260062	rab33a
ENSDARG00000057426	498.745	-1.75815	0.506163	-3.47349	0.000513732	0.00183327	oard1
ENSDARG00000057468	188.934	-6.57212	0.800669	-8.20829	2.24366e-16	9.45489e-15	kcnc2
ENSDARG00000057562	655.538	-2.93976	0.518968	-5.66463	1.47341e-08	1.5985e-07	polr3c
ENSDARG00000057633	56.9526	-2.88965	0.82974	-3.4826	0.00049657	0.00178098	cxcr4a
ENSDARG00000057648	1506.74	-1.93481	0.478718	-4.04164	5.30785e-05	0.00025011	dnttip2
ENSDARG00000057649	93.2732	-3.19939	0.694204	-4.60871	4.05169e-06	2.55117e-05	satb1a
ENSDARG00000057672	493.969	-2.97891	0.506481	-5.88158	4.06368e-09	5.01925e-08	plpp5
ENSDARG00000057676	663.784	-1.38764	0.49575	-2.79906	0.00512513	0.0133512	golga7
ENSDARG00000057681	630.24	-1.92234	0.487432	-3.9438	8.0199e-05	0.000358651	si:ch211-266o15.1
ENSDARG00000057688	309.371	-2.39847	0.564679	-4.24749	2.16183e-05	0.000112752	ical1
ENSDARG00000057707	611.251	-4.12722	0.575501	-7.17152	7.41676e-13	1.78452e-11	zgc:66443
ENSDARG00000057719	888.818	-1.99407	0.473081	-4.21508	2.49687e-05	0.000128685	atl2
ENSDARG00000057738	2238.69	-1.66154	0.534054	-3.11119	0.00186335	0.00558452	hells
ENSDARG00000057743	98.0559	-2.03302	0.765388	-2.65619	0.0079029	0.0193056	si:dkey-10f21.4
ENSDARG00000057751	111.416	-1.95242	0.634203	-3.07854	0.00208016	0.00613758	zbtb47a
ENSDARG00000057767	138.768	-3.339	0.776731	-4.29879	1.71737e-05	9.21017e-05	nudt4a
ENSDARG00000057772	459.618	-1.74082	0.544035	-3.19983	0.0013751	0.00430055	2019-03-07
ENSDARG00000057830	510.782	-1.62087	0.516014	-3.14114	0.00168291	0.00512204	dnmt3bb.2
ENSDARG00000057907	475.624	-2.24583	0.544884	-4.12167	3.76131e-05	0.00018464	si:ch73-181d5.4
ENSDARG00000057910	397.868	-1.74753	0.696066	-2.51058	0.0120534	0.0275932	mrps34
ENSDARG00000057912	2035.75	-1.36663	0.488927	-2.79517	0.00518731	0.0135084	eif1axb
ENSDARG00000057929	472.78	-2.65526	0.552192	-4.80859	1.51999e-06	1.05093e-05	naf1
ENSDARG00000057939	425.648	-1.82245	0.513501	-3.54907	0.000386589	0.00143224	ythdf3
ENSDARG00000057973	448.387	-3.10503	0.560703	-5.53775	3.06378e-08	3.11541e-07	dph1
ENSDARG00000057983	286.053	-3.44788	0.577871	-5.96652	2.42363e-09	3.14576e-08	svopl
ENSDARG00000057987	1067.62	-1.41824	0.499246	-2.84077	0.00450054	0.0119369	uba3
ENSDARG00000057995	59.2226	-2.64701	0.811024	-3.26379	0.00109933	0.00354494	arl15b
ENSDARG00000058015	102.309	-3.0191	0.674647	-4.47508	7.6381e-06	4.47801e-05	ano3
ENSDARG00000058030	993.536	-1.39997	0.467925	-2.99188	0.00277269	0.0078651	hspa14
ENSDARG00000058050	190.602	-2.81268	0.724703	-3.88114	0.000103966	0.000450161	smyd3
ENSDARG00000058068	203.557	-3.07861	0.669376	-4.59922	4.2408e-06	2.6537e-05	tnfsf10l4
ENSDARG00000058088	1358.66	-1.23578	0.479894	-2.57512	0.0100206	0.0236189	aifm1
ENSDARG00000058102	372.01	-3.22641	0.53241	-6.06001	1.3611e-09	1.86703e-08	sardh
ENSDARG00000058114	287.326	-2.69842	0.656516	-4.11021	3.95297e-05	0.000193109	impad1
ENSDARG00000058127	115.618	-2.12044	0.713064	-2.9737	0.00294229	0.00828166	hcfc2
ENSDARG00000058154	7.57004	-6.11266	2.3506	-2.60047	0.0093096	0.0222047	znf385c
ENSDARG00000058202	141.916	-1.77352	0.625749	-2.83423	0.00459364	0.0121491	pex16
ENSDARG00000058203	1091.6	-1.5575	0.488014	-3.1915	0.00141537	0.00441095	smc1al
ENSDARG00000058208	179.454	-1.51681	0.563236	-2.69302	0.00708077	0.0175698	slc25a26
ENSDARG00000058229	83.0785	-2.09318	0.789875	-2.65002	0.00804876	0.0196037	acot11a
ENSDARG00000058237	136.082	-4.33683	0.692316	-6.26424	3.74651e-10	5.7381e-09	ssbp3a
ENSDARG00000058267	262.017	-1.28832	0.532345	-2.42008	0.0155171	0.0343196	glmna
ENSDARG00000058297	719.899	-1.22726	0.486246	-2.52395	0.0116043	0.0267213	timm13
ENSDARG00000058323	73.7585	-2.96872	0.739991	-4.01183	6.02501e-05	0.000279855	tmbim1a
ENSDARG00000058346	1134.26	-2.31135	0.553237	-4.17786	2.94261e-05	0.00014869	sass6
ENSDARG00000058367	142.643	-1.43741	0.582414	-2.46803	0.013586	0.030597	abhd14a
ENSDARG00000058394	874.873	-2.13005	0.493845	-4.3132	1.60911e-05	8.70317e-05	tagln3b
ENSDARG00000058425	1398.5	-2.6527	0.548804	-4.8336	1.34087e-06	9.3848e-06	rab35b
ENSDARG00000058452	606.797	-1.89508	0.48621	-3.89766	9.71286e-05	0.000424529	abhd17c
ENSDARG00000058461	656.196	-1.51317	0.498478	-3.03559	0.00240067	0.0069528	ice1
ENSDARG00000058471	5435.41	-2.50186	0.678096	-3.68954	0.000224658	0.000887602	plk1
ENSDARG00000058494	701.468	-3.65554	0.518358	-7.05215	1.76175e-12	3.96805e-11	dnaja3a
ENSDARG00000058522	444.124	-1.78708	0.574417	-3.11111	0.00186383	0.00558519	shq1
ENSDARG00000058560	1833.14	-1.28083	0.459449	-2.78775	0.00530748	0.0137649	adrm1
ENSDARG00000058561	339.594	-4.17713	0.6769	-6.17097	6.78722e-10	9.90346e-09	fbxo30a
ENSDARG00000058562	150.297	-1.75146	0.613973	-2.85267	0.00433533	0.0115609	znf991
ENSDARG00000058571	471.468	-3.2421	0.548132	-5.91482	3.32237e-09	4.18747e-08	pdp2
ENSDARG00000058578	357.668	-2.59962	0.539437	-4.81913	1.44185e-06	1.00127e-05	ccdc106b
ENSDARG00000058605	538.889	-2.99223	0.512954	-5.83334	5.43303e-09	6.50791e-08	vsig10
ENSDARG00000058608	59.8261	-3.14591	0.839344	-3.74806	0.000178209	0.000723655	wsb2
ENSDARG00000058679	277.702	-2.14921	0.577786	-3.71974	0.00019943	0.000799302	zgc:114104
ENSDARG00000058692	156.707	-1.80007	0.726896	-2.47638	0.0132722	0.0299969	fzd3b
ENSDARG00000058728	287.056	-1.80114	0.547534	-3.28955	0.00100347	0.00328301	nudt2
ENSDARG00000058780	74.1844	-5.04203	0.886414	-5.68812	1.28444e-08	1.41281e-07	slc9a2
ENSDARG00000058801	934.34	-1.81077	0.475695	-3.80657	0.000140905	0.000587367	rev3l
ENSDARG00000058806	420.375	-1.26257	0.514903	-2.45205	0.0142047	0.0318162	naxe
ENSDARG00000058818	427.424	-2.66266	0.587816	-4.52974	5.9055e-06	3.56772e-05	rbm38
ENSDARG00000058820	407.516	-2.42577	0.584066	-4.15325	3.27789e-05	0.000163438	bin1b
ENSDARG00000058821	91.4302	-3.2152	0.810783	-3.96555	7.32266e-05	0.000331746	sema5a
ENSDARG00000058829	10.3876	-4.54621	1.83336	-2.47971	0.0131488	0.0297421	zgc:171424
ENSDARG00000058868	769.092	-1.27676	0.522238	-2.44478	0.014494	0.0323629	apc
ENSDARG00000058893	248.838	-1.33316	0.543903	-2.4511	0.014242	0.0318817	nhej1
ENSDARG00000058939	390.392	-1.73027	0.511406	-3.38335	0.000716065	0.00244987	b4galnt3b
ENSDARG00000058946	1179.53	-1.054	0.466433	-2.25971	0.0238395	0.0494889	CU856539.2
ENSDARG00000058958	383.658	-2.63281	0.627809	-4.19364	2.74512e-05	0.000139793	trim35-7
ENSDARG00000058961	13.4003	-4.44206	1.68369	-2.63828	0.00833272	0.0202177	ngfa
ENSDARG00000059020	141.332	-2.80664	0.644408	-4.35537	1.32839e-05	7.35869e-05	thap1
ENSDARG00000059044	52.7431	-2.63699	0.816215	-3.23076	0.00123463	0.00391359	epm2a
ENSDARG00000059048	34.8027	-3.3734	1.32053	-2.55459	0.0106314	0.0248084	mpzl1l
ENSDARG00000059209	53.2863	-2.28405	0.984197	-2.32072	0.0203017	0.0431363	abhd13
ENSDARG00000059212	562.086	-1.58235	0.543351	-2.91221	0.00358878	0.00983218	ciao1
ENSDARG00000059226	355.993	-4.74272	0.594851	-7.97295	1.54927e-15	5.74395e-14	zbtb8a
ENSDARG00000059234	289.837	-1.64266	0.523359	-3.13868	0.00169713	0.00515594	mrps27
ENSDARG00000059247	261.777	-1.34217	0.577338	-2.32476	0.0200846	0.0427403	tmem54a
ENSDARG00000059252	6327.39	-10.6921	0.837227	-12.7708	2.3866e-37	9.13822e-35	zpcx
ENSDARG00000059279	32.3577	-2.42293	1.01776	-2.38065	0.0172822	0.0376573	tfap2a
ENSDARG00000059308	814.774	-2.10578	0.510972	-4.12112	3.77036e-05	0.000185002	golt1bb
ENSDARG00000059322	1074.08	-1.63972	0.505868	-3.2414	0.00118943	0.0037979	topbp1
ENSDARG00000059349	44.2525	-3.47344	0.923907	-3.75951	0.000170245	0.000694033	homer2
ENSDARG00000059400	280.32	-1.79798	0.567913	-3.16595	0.00154579	0.00475866	tmem167b
ENSDARG00000059406	311.359	-2.05156	0.724017	-2.83358	0.00460291	0.0121692	raf1b
ENSDARG00000059437	124.247	-2.29387	0.63896	-3.59001	0.000330669	0.00124932	fktn
ENSDARG00000059461	1661.42	-1.31187	0.55961	-2.34426	0.019065	0.0408722	mepce
ENSDARG00000059475	212.22	-2.79789	0.575911	-4.85819	1.18462e-06	8.4051e-06	camsap3
ENSDARG00000059503	171.703	-2.05775	0.568669	-3.61854	0.000296274	0.00113344	ACSF3
ENSDARG00000059529	46.1811	-2.45089	1.02348	-2.39466	0.0166358	0.0364275	KIAA0895L
ENSDARG00000059549	84.3796	-2.4475	0.697361	-3.50966	0.000448676	0.0016316	akap10
ENSDARG00000059574	27.8102	-4.76565	1.38054	-3.45202	0.000556404	0.00196449	fscn2a
ENSDARG00000059581	58.3685	-3.82863	0.839373	-4.56129	5.08392e-06	3.12148e-05	mbd5
ENSDARG00000059629	141.027	-2.51889	0.880245	-2.86158	0.00421533	0.0112829	asphd2
ENSDARG00000059630	72.3866	-1.79048	0.696571	-2.57042	0.0101575	0.023867	mlec
ENSDARG00000059658	336.736	-1.67595	0.625502	-2.67937	0.00737612	0.0181949	mrm1
ENSDARG00000059680	835.398	-3.05724	0.809486	-3.77676	0.000158879	0.00065292	fscn1a
ENSDARG00000059711	1354.8	-2.72349	0.53794	-5.06281	4.13131e-07	3.27088e-06	nol6
ENSDARG00000059712	44.302	-4.48011	1.12027	-3.99912	6.3578e-05	0.000292509	slc19a2
ENSDARG00000059798	60.8586	-2.39249	0.940406	-2.5441	0.0109559	0.02544	kcnq1
ENSDARG00000059806	377.243	-3.7931	0.639953	-5.92715	3.08242e-09	3.90276e-08	sacm1lb
ENSDARG00000059812	738.558	-1.50847	0.528065	-2.8566	0.00428204	0.0114394	sin3ab
ENSDARG00000059817	105.128	-2.26871	0.724011	-3.13353	0.00172715	0.00523283	mtmr12
ENSDARG00000059846	43.6891	-1.95514	0.863816	-2.26337	0.0236128	0.0491281	epg5
ENSDARG00000059857	233.467	-2.23949	0.57763	-3.87703	0.000105739	0.000456857	blvra
ENSDARG00000059870	1077.42	-1.50234	0.465431	-3.22784	0.0012473	0.00394604	clk2b
ENSDARG00000059887	94.7362	-2.19934	0.700491	-3.13971	0.00169115	0.00514128	eral1
ENSDARG00000059917	189.805	-3.99039	0.668604	-5.96824	2.39831e-09	3.11739e-08	ccnj
ENSDARG00000059925	357.573	-1.51063	0.589621	-2.56203	0.0104061	0.0243467	usp24
ENSDARG00000059961	277.92	-2.72712	0.545167	-5.00237	5.66308e-07	4.34124e-06	chpf2
ENSDARG00000059983	514.337	-1.63131	0.518345	-3.14715	0.00164868	0.00503559	zufsp
ENSDARG00000060001	250.346	-1.9297	0.690022	-2.79657	0.00516475	0.0134513	mettl9
ENSDARG00000060006	227.025	-2.19636	0.608103	-3.61182	0.000304059	0.00115943	nedd4l
ENSDARG00000060068	247.042	-1.80405	0.630134	-2.86297	0.00419695	0.0112472	fam98b
ENSDARG00000060089	2167.87	-2.57358	0.459173	-5.60481	2.08482e-08	2.19638e-07	btaf1
ENSDARG00000060096	34.4883	-3.18841	1.29474	-2.46259	0.0137936	0.0309955	tbc1d10ab
ENSDARG00000060112	1634.68	-3.98213	0.552079	-7.21298	5.47421e-13	1.34185e-11	sybu
ENSDARG00000060113	820.446	-3.25021	0.493224	-6.58973	4.40625e-11	7.917e-10	znf395a
ENSDARG00000060197	485.367	-2.84315	0.574765	-4.94662	7.55126e-07	5.63125e-06	atp2c1
[truncated: 8,728 more rows]
